# Supplementary material for: Dimethylnonacethrene – en route to a magnetic switch
Source: Royal Society of Chemistry journal article supplement (doi:10.1039/d3cc01301d), 2023-01-01
Supplement: d3cc01301d1.pdf [file d3cc01301d1.pdf]

## Supplementary Information

### Dimethylnonacethrene – *en route* to a magnetic switch

Daniel Čavlović,<sup>†</sup> Olivier Blacque,<sup>†</sup> Ivo Krummenacher,<sup>#</sup> Holger Braunschweig,<sup>#</sup> Prince Ravat,<sup>\*,†,§</sup> and Michal Juríček<sup>\*,†,§</sup>

<sup>†</sup>Department of Chemistry, University of Zurich, Winterthurerstrasse 190, 8057 Zurich, Switzerland

<sup>#</sup>Institute of Inorganic Chemistry, Julius Maximilian University of Würzburg, Am Hubland, 97074 Würzburg, Germany

<sup>#</sup>Institute of Organic Chemistry, Julius Maximilian University of Würzburg, Am Hubland, 97074 Würzburg, Germany

<sup>§</sup>Department of Chemistry, University of Basel, St. Johannis-Ring 19, CH-4056 Basel, Switzerland

#### Table of Contents

|                               |     |
|-------------------------------|-----|
| Supporting Figures            | S1  |
| Synthesis                     | S2  |
| NMR Assignments               | S7  |
| Copies of NMR Spectra         | S9  |
| HR-MS Data                    | S25 |
| EPR Spectroscopy              | S37 |
| UV–vis–NIR Spectroscopy       | S39 |
| X-Ray Crystallography         | S40 |
| Quantum Chemical Calculations | S46 |
| Cartesian Coordinates         | S53 |
| References                    | S64 |

## Supporting Figures

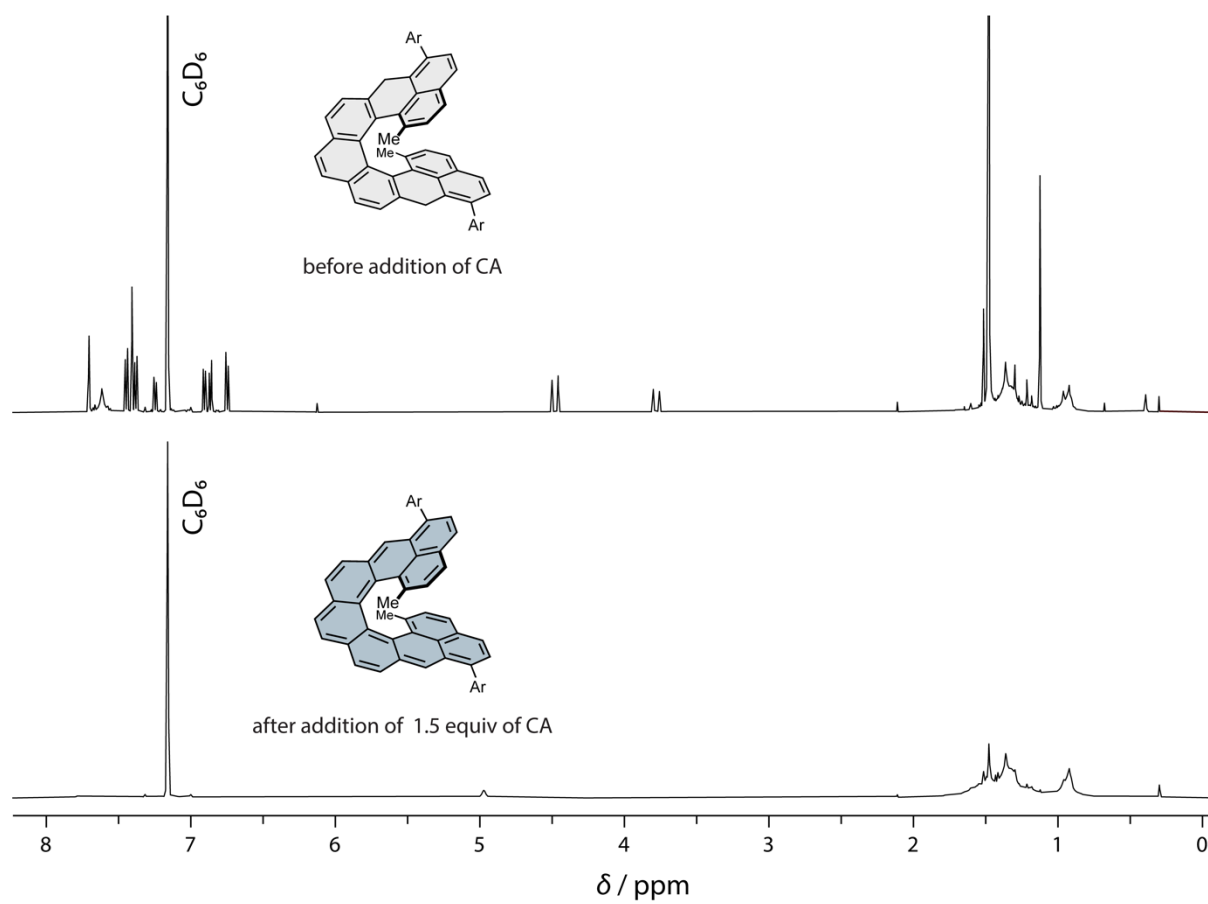

**Figure S1:** Comparison of <sup>1</sup>H NMR (400 MHz, 298 K, C<sub>6</sub>D<sub>6</sub>) spectra of 2H-DMNC-Ar before (top) and after (bottom) the addition of 1.5 equivalents of *p*-chloranil (CA).

## Synthesis

**Materials and Instrumentation.** All chemicals and solvents were purchased from commercial sources and were used without further purification unless stated otherwise. The reactions and experiments that are sensitive to dioxygen were performed using Schlenk techniques and argon-saturated solvents. The NMR experiments were performed on NMR spectrometers operating at 400 or 500 MHz proton frequencies. Standard pulse sequences were used, and the data were processed using twofold zero-filling in the indirect dimension for all 2D experiments. Chemical shifts ( $\delta$ ) are reported in parts per million (ppm) relative to the solvent residual peak ( $^1\text{H}$  and  $^{13}\text{C}$  NMR, respectively):  $\text{CDCl}_3$  ( $\delta = 7.26$  and  $77.16$  ppm) and  $\text{CD}_2\text{Cl}_2$  ( $\delta = 5.32$  and  $53.84$  ppm).<sup>1</sup> Compound **3** was previously described by our group and synthesized according to the published procedure.<sup>2</sup> The raw NMR and IR data is available free of charge on a public repository Zenodo (DOI:10.5281/zenodo.7733689).

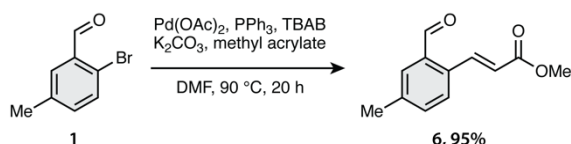

**Methyl (E)-3-(2-formyl-4-methylphenyl)acrylate (6).** A mixture of commercially available 2-bromo-5-methylbenzaldehyde (**1**; 1.00 g, 5.02 mmol, 1.0 equiv.), triphenyl phosphine (0.41 g, 1.56 mmol, 31 mol%), palladium acetate (175 mg, 779  $\mu\text{mol}$ , 16 mol%), potassium carbonate (760 mg, 5.11 mmol, 1.0 equiv.), and tetrabutylammonium bromide (TBAB; 1.64 g, 5.09 mmol, 1.0 equiv.) in DMF (125 mL) was deoxygenated by passing nitrogen through the mixture under sonication for 30 min. Then, methyl acrylate (1.9 mL, 21 mmol, 4.2 equiv.) was added before the mixture was heated at  $90^\circ\text{C}$  for 20 h under a nitrogen atmosphere. The reaction mixture was poured into water and extracted with  $\text{CH}_2\text{Cl}_2$ . The combined organic layers were washed with aq. HCl (2 M), dried over anhydrous  $\text{MgSO}_4$ , and filtered. After evaporation of the solvents, the residue was passed through a pad of celite using  $\text{CH}_2\text{Cl}_2$  as an eluent to afford, after evaporation of the solvent, the desired product (972 mg, 95%) as an orange solid (mp  $53.8$ – $54.7^\circ\text{C}$ ).  $^1\text{H}$  NMR (400 MHz,  $\text{CDCl}_3$ , ppm):  $\delta$  10.28 (s, 1H), 8.51 (d,  $J = 15.9$  Hz, 1H), 7.68 (d,  $J = 1.9$  Hz, 1H), 7.55 (d,  $J = 7.9$  Hz, 1H), 7.42 (dd,  $J = 7.9, 1.9$  Hz, 1H), 6.36 (d,  $J = 15.9$  Hz, 1H), 3.83 (s, 3H), 2.45 (s, 3H).  $^{13}\text{C}$  NMR (101 MHz,  $\text{CDCl}_3$ , ppm):  $\delta$  192.1, 167.0, 141.2, 140.6, 134.9, 133.91, 133.89, 132.9, 128.0, 122.0, 52.0, 21.3. IR: 1710, 184, 1432, 1321, 1312, 1285, 1189, 1175, 1156, 1115, 998, 984, 932, 830, 775, 743, 710, 510  $\text{cm}^{-1}$ . HRMS (ESI)  $m/z$ :  $[M + \text{H}]^+$  Calcd for  $\text{C}_{12}\text{H}_{13}\text{O}_3$  205.08592; Found 205.08576. The data are in accordance with those reported in the literature.<sup>3</sup>

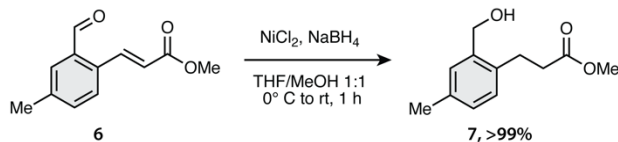

**Methyl 3-[2-(hydroxymethyl)-4-methylphenyl]propanoate (7).** A mixture of methyl (E)-3-(2-formyl-4-methylphenyl)acrylate (**6**; 972 mg, 4.76 mmol, 1.0 equiv.) and nickel chloride hexahydrate (1.13 g, 4.76 mmol, 1.0 equiv.) in THF/MeOH (80 mL, 1:1) was stirred at  $0^\circ\text{C}$  for 15 min before sodium borohydride (505 mg, 13.3 mmol, 2.8 equiv.) was carefully added in three portions. The mixture was stirred for 45 min at room temperature before it was poured into aq. HCl (2 M) and extracted with  $\text{CH}_2\text{Cl}_2$ . The combined organic layers were dried over anhydrous  $\text{MgSO}_4$  and filtered. After evaporation of the solvents, the residue was passed through a pad of celite using  $\text{CH}_2\text{Cl}_2$  as an eluent to afford, after evaporation of the solvent, the desired product (992 mg, >99%) as a colorless liquid.  $^1\text{H}$  NMR (400 MHz,  $\text{CDCl}_3$ , ppm):  $\delta$  7.18 (d,  $J = 2.0$  Hz, 1H), 7.10 (d,  $J = 7.8$  Hz, 1H), 7.07 (dd,  $J = 7.8, 2.0$  Hz, 1H), 4.69 (s, 2H), 3.65 (s, 3H), 2.99 (t,  $J = 7.6$  Hz, 2H), 2.68 (t,  $J = 7.6$  Hz, 2H), 2.32 (s, 3H).  $^{13}\text{C}$  NMR (101 MHz,  $\text{CDCl}_3$ , ppm):  $\delta$  173.9, 138.4, 136.4, 135.8, 130.0, 129.2, 129.0, 63.4, 51.9, 35.5, 26.7, 21.1. IR: 3443, 2950, 2921, 1732, 1436, 1195, 1151, 1027, 990, 822, 551  $\text{cm}^{-1}$ . HRMS (ESI)  $m/z$ :  $[M + \text{Na}]^+$  Calcd for  $\text{C}_{11}\text{H}_{14}\text{O}_3$  231.09917; Found 231.09896.

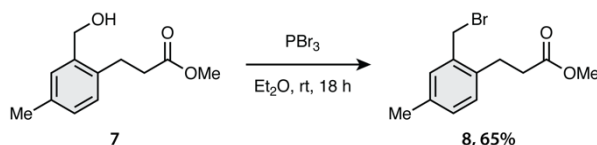

**Methyl 3-[2-(bromomethyl)-4-methylphenyl]propanoate (8).** A mixture of methyl 3-[2-(hydroxy-methyl)-4-methylphenyl]propanoate (**7**; 1.04 g, 4.99 mmol, 1.0 equiv.) and phosphorus tribromide (0.50 mL, 5.3 mmol, 1.1 equiv.) in  $\text{Et}_2\text{O}$  (20 mL) was stirred at room temperature for 18 h before it was carefully poured into water. The resulting mixture was extracted with  $\text{CH}_2\text{Cl}_2$  and the combined organic layers were dried over anhydrous  $\text{MgSO}_4$  and filtered. After evaporation of the solvents, the residue was purified by column chromatography over silica gel using  $\text{CH}_2\text{Cl}_2$  as an eluent to afford the desired product (879 mg, 65%) as a colorless liquid.  $^1\text{H}$  NMR (400 MHz,  $\text{CDCl}_3$ , ppm):  $\delta$  7.15 (s, 1H), 7.10–7.06 (m, 2H), 4.54 (s, 2H), 3.69 (s, 3H), 3.04 (t,  $J = 7.9$  Hz, 2H), 2.69 (t,  $J = 7.9$  Hz, 2H), 2.31 (s, 3H).  $^{13}\text{C}$  NMR (101 MHz,  $\text{CDCl}_3$ , ppm):  $\delta$  173.4, 136.8, 136.5, 135.5,

131.5, 130.2, 129.6, 51.9, 35.1, 31.8, 26.9, 21.0. IR: 2950, 2923, 1735, 1436, 1210, 1158, 822, 576  $\text{cm}^{-1}$ . HRMS (ESI)  $m/z$ :  $[M + \text{Na}]^+$  Calcd for  $\text{C}_{11}\text{H}_{13}\text{O}_2\text{Br}$  293.01476; Found 293.01461.

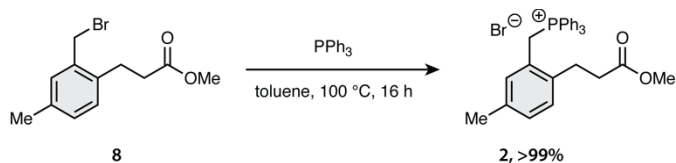

**[2-(3-Methoxy-3-oxopropyl)-5-methylbenzyl]triphenylphosphonium bromide (2).** A mixture of methyl 3-[2-(bromomethyl)-4-methylphenyl]propanoate (**8**; 879 mg, 3.24 mmol, 1.0 equiv.) and triphenyl phosphine (908 mg, 3.46 mmol, 1.1 equiv.) in toluene (30 mL) was stirred at room temperature for 16 h. The precipitate was filtered and washed with hexane. After drying under reduced pressure, the desired product (1.73 g, >99%) was obtained as a colorless powder (mp 194.7–195.4 °C).  $^1\text{H}$  NMR (400 MHz,  $\text{CDCl}_3$ , ppm):  $\delta$  7.83–7.74 (m, 3H), 7.71–7.59 (m, 12H), 7.00 (dt,  $J = 7.9, 2.3$  Hz, 1H), 6.93 (d,  $J = 2.3$  Hz, 1H), 6.88 (d,  $J = 7.9$  Hz, 1H), 5.29 (d,  $J = 14.2$  Hz, 2H), 3.61 (s, 2H), 2.34 (t,  $J = 7.5$  Hz, 2H), 2.07–2.03 (m, 5H).  $^{13}\text{C}$  NMR (101 MHz,  $\text{CDCl}_3$ , ppm):  $\delta$  173.4, 137.9 (d,  $J = 6.0$  Hz), 137.1 (d,  $J = 3.6$  Hz), 135.2 (d,  $J = 3.1$  Hz), 134.5 (d,  $J = 9.7$  Hz), 132.9 (d,  $J = 5.1$  Hz), 130.3 (d,  $J = 12.6$  Hz), 130.1 (d,  $J = 4.0$  Hz), 129.5 (d,  $J = 2.8$  Hz), 125.1 (d,  $J = 8.8$  Hz), 117.8 (d,  $J = 85.1$  Hz), 52.0, 34.8, 28.0 (d,  $J = 46.7$  Hz), 26.6, 20.9.  $^{31}\text{P}$  NMR (162 MHz,  $\text{CDCl}_3$ ):  $\delta$  22.44. IR: 1716, 1434, 1424, 1202, 1107, 833, 749, 738, 720, 712, 689, 517, 505, 493, 473  $\text{cm}^{-1}$ . HRMS (ESI)  $m/z$ :  $[M - \text{Br}]^+$  Calcd for  $\text{C}_{29}\text{H}_{28}\text{O}_2\text{PBr}$  453.1978; Found 453.1979.

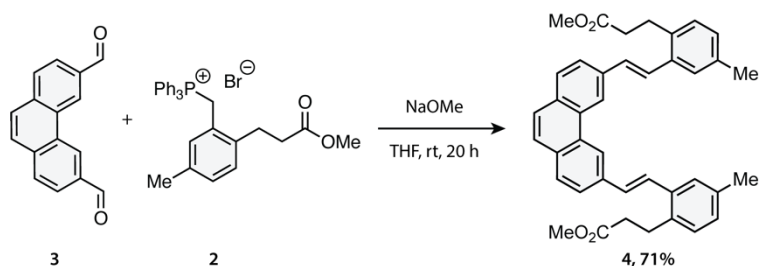

**Dimethyl 3,3'-[[1E,1'E]-phenanthrene-3,6-diylbis(ethene-2,1-diyl)]bis(4-methyl-2,1-phenylene)dipropionate (4).** A mixture of [2-(3-methoxy-3-oxopropyl)-5-methylbenzyl]triphenylphosphonium bromide (**2**; 1.50 g, 2.81 mmol, 2.1 equiv.) and anhydrous THF (40 mL) was stirred at room temperature before sodium methoxide (5.4 M in MeOH, 0.50 mL, 3.6 mmol, 2.6 equiv.) was added dropwise and the resulting mixture was stirred for 5 min. Then, phenanthrene-3,6-dicarbaldehyde (**3**; 320 mg, 1.37 mmol, 1.0 equiv.) was added in three portions as a solid and the resulting mixture was stirred for 20 h at room temperature. The reaction mixture was poured into aq. HCl (2 M) and extracted with  $\text{CH}_2\text{Cl}_2$ . The combined organic layers were dried over anhydrous  $\text{MgSO}_4$  and filtered. The solvent was evaporated and the residue was purified by column chromatography over silica gel using  $\text{CH}_2\text{Cl}_2$  as an eluent to afford an isomeric mixture of the product (569 mg, 71%) as a pale yellow solid (mp 104.3–105.1 °C). One fraction contained pure (*E,E*)-isomer and was used for NMR characterization:  $^1\text{H}$  NMR (400 MHz,  $\text{CD}_2\text{Cl}_2$ , ppm):  $\delta$  8.85 (s, 2H), 7.92 (s, 4H), 7.75 (s, 2H), 7.64 (d,  $J = 16.0$  Hz, 2H), 7.61–7.55 (m, 2H), 7.38 (d,  $J = 16.0$  Hz, 2H), 7.16 (d,  $J = 7.8$  Hz, 2H), 7.11 (dd,  $J = 7.8, 1.8$  Hz, 2H), 3.66 (s, 6H), 3.17 (t,  $J = 7.8$  Hz, 4H), 2.67 (t,  $J = 7.9$  Hz, 4H), 2.43 (s, 6H).  $^{13}\text{C}$  NMR (101 MHz,  $\text{CD}_2\text{Cl}_2$ , ppm):  $\delta$  173.6, 136.8, 136.4, 136.2, 136.1, 132.4, 131.0, 130.9, 129.9, 129.4, 129.1, 127.0, 126.9, 126.8, 124.8, 122.1, 51.9, 35.9, 28.6, 21.3. IR: 2917, 2849, 1735, 1435, 1197, 1163, 1033, 964, 882, 838, 549  $\text{cm}^{-1}$ . HRMS (ESI)  $m/z$ :  $[M + \text{H}]^+$  Calcd for  $\text{C}_{40}\text{H}_{38}\text{O}_4$  583.28429; Found 583.28415.

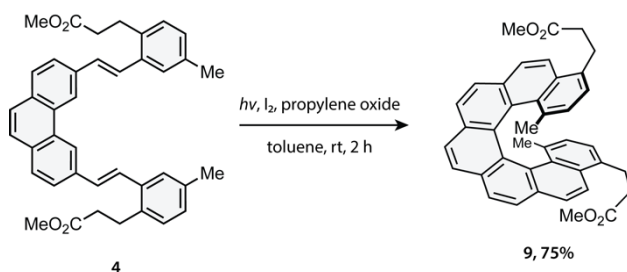

**(±)-Dimethyl 3,3'-(1,18-dimethylbenzo[1,2-c:4,3-c']diphenanthrene-4,15-diyl)dipropionate (9).** The photocyclodehydrogenation reaction was performed in an immersion-well photoreactor system with a quartz cooling tube and quartz immersion tubes containing 150 W medium-pressure mercury lamp. An argon-saturated solution of dimethyl 3,3'-[[1E,1'E]-phenanthrene-3,6-diylbis(ethene-2,1-diyl)]bis(4-methyl-2,1-phenylene)dipropionate (**4**; 176 mg, 0.301 mmol, 1.0 equiv.), iodine (170 mg, 0.670 mmol, 2.2 equiv.), and propylene oxide (10.0 mL, 143 mmol, 473 equiv.) in toluene (650 mL) was irradiated for 2 h. The resulting solution was washed with saturated aq.  $\text{Na}_2\text{S}_2\text{O}_3$  and the organic layer was separated. The



solvent was evaporated and the residue was purified by column chromatography over silica gel using CH<sub>2</sub>Cl<sub>2</sub> as an eluent to afford the desired product (128 mg, 75%) as a yellow solid (mp 188.5–192.4 °C). <sup>1</sup>H NMR (400 MHz, CD<sub>2</sub>Cl<sub>2</sub>, ppm): δ 8.02–7.99 (m, 4H), 7.87 (d, *J* = 8.1 Hz, 2H), 7.59 (d, *J* = 8.7 Hz, 2H), 7.47 (d, *J* = 8.7 Hz, 2H), 6.77 (d, *J* = 7.3 Hz, 2H), 6.30 (dd, *J* = 7.3, 0.9 Hz, 2H), 3.69 (s, 6H), 3.23 (ddd, *J* = 14.3, 10.3, 5.6 Hz, 2H), 2.97 (ddd, *J* = 14.4, 10.3, 6.4 Hz, 2H), 2.67 (ddd, *J* = 15.9, 10.3, 5.6 Hz, 2H), 2.55 (ddd, *J* = 15.8, 10.4, 6.4 Hz, 2H), 0.63 (s, 6H). <sup>13</sup>C NMR (101 MHz, CD<sub>2</sub>Cl<sub>2</sub>, ppm): δ 173.7, 133.0, 131.8, 131.4, 131.1, 130.3, 130.2, 128.4, 128.1, 127.0, 126.6, 126.3, 125.8, 124.9, 124.6, 123.4, 51.9, 35.5, 28.4, 21.4. IR: 1735, 1433, 1287, 1166, 845, 833, 823, 811, 611, 517 cm<sup>-1</sup>. HRMS (ESI) *m/z*: [*M* + H]<sup>+</sup> Calcd for C<sub>40</sub>H<sub>34</sub>O<sub>4</sub> 579.2530; Found 579.2528. The structure was additionally validated by SC-XRD (see X-Ray Crystallography section).

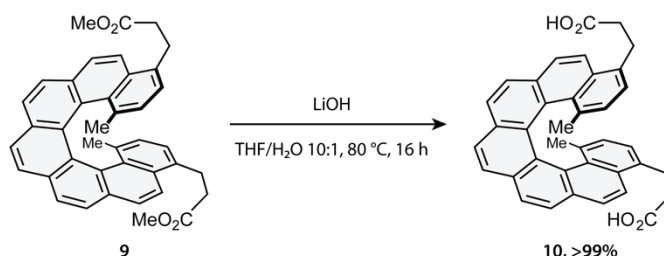

**3,3'-(1,18-Dimethylbenzo[1,2-*c*:4,3-*c'*]diphenanthrene-4,15-diyl)dipropionic acid (10).** A mixture of dimethyl 3,3'-(1,18-dimethylbenzo[1,2-*c*:4,3-*c'*]diphenanthrene-4,15-diyl)dipropionate (**9**; 121 mg, 0.209 mmol, 1.0 equiv.) and lithium hydroxide monohydrate (50.1 mg, 2.09 mmol, 10 equiv.) in THF/H<sub>2</sub>O (11 mL, 10:1) was heated at 80 °C for 16 h. The reaction mixture was cooled to room temperature and concentrated under reduced pressure. The residue was acidified with aq. HCl (2 M), filtered, and washed with water and CH<sub>2</sub>Cl<sub>2</sub>. Drying under reduced pressure afforded the desired product (115 mg, >99%) as a yellow solid (mp 301.2–302.7 °C) that was used in the next step without further purification. Due to the poor solubility of the compound, only a <sup>1</sup>H NMR spectrum could be acquired: <sup>1</sup>H NMR (400 MHz, CD<sub>3</sub>OD, ppm): δ 8.02 (s, 1H), 8.01 (d, *J* = 8.0 Hz, 2H), 7.88 (d, *J* = 8.1 Hz, 2H), 7.60 (d, *J* = 8.7 Hz, 2H), 7.51 (d, *J* = 8.8 Hz, 2H), 6.79 (d, *J* = 7.3 Hz, 2H), 6.27 (d, *J* = 7.4 Hz, 2H), 3.25–3.19 (m, *J* = 10.2, 9.7, 5.0 Hz, 2H, partial overlap with the solvent residual peak), 2.98 (ddd, *J* = 15.2, 10.0, 6.4 Hz, 2H), 2.65 (ddd, *J* = 15.7, 10.1, 5.6 Hz, 2H), 2.52 (ddd, *J* = 16.2, 10.1, 6.4 Hz, 2H), 0.60 (s, 6H). IR: 2925, 1705, 1412, 1295, 1209, 847, 825, 813, 612, 521 cm<sup>-1</sup>. HRMS (ESI) *m/z*: [*M* + Na]<sup>+</sup> Calcd for C<sub>38</sub>H<sub>30</sub>O<sub>4</sub> 573.2036; Found 573.2042.

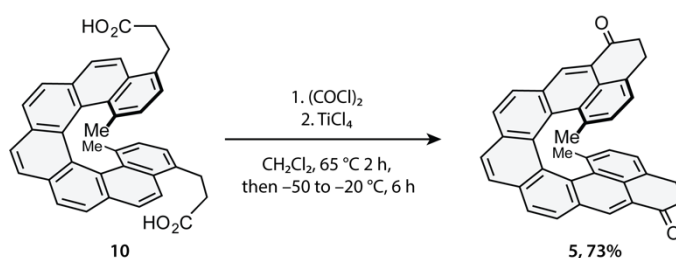

**(±)-1,20-Dimethyl-4,5,16,17-tetrahydrobenzo[no]benzo[8,9]-anthra[1,2-*a*]tetraphene-6,15-dione (5).** A solution of (±)-3,3'-(1,18-dimethylbenzo[1,2-*c*:4,3-*c'*]diphenanthrene-4,15-diyl)dipropionic acid (**10**; 115 mg, 0.209 mmol, 1.0 equiv.) in oxalyl chloride (25 mL) was heated at 65 °C for 2 h before the excess of oxalyl chloride was removed under reduced pressure. The crude acyl chloride intermediate was dissolved in CH<sub>2</sub>Cl<sub>2</sub> (50 mL) and the solution was cooled to -45 °C. TiCl<sub>4</sub> (0.25 mL, 2.3 mmol, 11 equiv.) was added and the reaction mixture was stirred in the temperature range between -45 and -20 °C over 6 h. Then, it was poured into aq. HCl (2 M), extracted with CH<sub>2</sub>Cl<sub>2</sub>, dried over MgSO<sub>4</sub>, and filtered. After evaporation of the solvents, the residue was purified by filtration through a short plug of silica gel using CH<sub>2</sub>Cl<sub>2</sub> as an eluent to give the desired product (74.8 mg, 73%) as a yellow solid (mp >321 °C decomposition). <sup>1</sup>H NMR (400 MHz, CD<sub>2</sub>Cl<sub>2</sub>, ppm): δ 8.31 (s, 2H), 8.11 (s, 2H), 8.09 (d, *J* = 8.1 Hz, 2H), 8.05 (d, *J* = 8.1 Hz, 2H), 6.89 (d, *J* = 7.3 Hz, 2H), 6.40 (dd, *J* = 7.2, 0.8 Hz, 2H), 3.27–3.07 (m, 4H), 2.96 (ddd, *J* = 15.3, 8.2, 6.3 Hz, 2H), 2.77 (ddd, *J* = 15.3, 7.4, 6.4 Hz, 2H), 0.64 (s, 6H). <sup>13</sup>C NMR (101 MHz, CD<sub>2</sub>Cl<sub>2</sub>, ppm): δ 198.5, 132.4, 131.4, 131.0, 130.4, 129.9, 129.5, 129.2, 129.0, 128.9, 128.1, 127.9 (2×), 127.7, 125.4, 124.2, 38.9, 28.8, 21.3. IR: 1678, 1592, 1244, 1161, 1140, 897, 838, 816, 739, 681, 609, 602, 581, 536, 523, 496 cm<sup>-1</sup>. HRMS (ESI) *m/z*: [*M* + H]<sup>+</sup> Calcd for C<sub>38</sub>H<sub>26</sub>O<sub>2</sub> 515.2006; Found 515.2010. The structure was additionally validated by SC-XRD (see X-Ray Crystallography section).

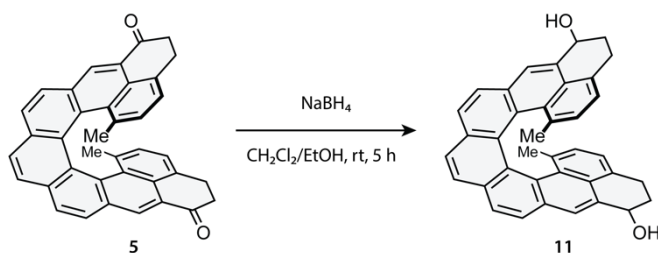

(±)-1,20-Dimethyl-4,5,6,15,16,17-hexahydrobenzo[no]benzo[8,9]anthra[1,2-*a*]tetraphene-6,15-diol (**11**). A solution of (±)-1,20-dimethyl-4,5,16,17-tetrahydrobenzo[no]benzo[8,9]anthra[1,2-*a*]tetraphene-6,15-dione (**5**; 40 mg, 0.077 mmol) and sodium borohydride (29 mg, 0.78 mmol) in CH<sub>2</sub>Cl<sub>2</sub>/EtOH (12 mL, 2:1) was stirred at room temperature for 5 h before the reaction was quenched by the addition of aq. HCl (2 M). The organic layer was separated and the aqueous layer was extracted with CH<sub>2</sub>Cl<sub>2</sub>. The combined organic layers were washed with saturated aq. NaHCO<sub>3</sub>, water, and brine, dried over anhydrous Na<sub>2</sub>SO<sub>4</sub>, and filtered. Evaporation of the solvents afforded the desired product (37 mg, 92%) as a brown solid and as a mixture of three possible diastereomers, which was used in the next step without purification. IR: 2918, 2849, 1176, 1140, 1082, 1029, 830, 612, 500 cm<sup>-1</sup>. HRMS (ESI) *m/z*: [M + Na]<sup>+</sup> Calcd for C<sub>38</sub>H<sub>30</sub>O<sub>2</sub> 541.2138; Found 541.2137.

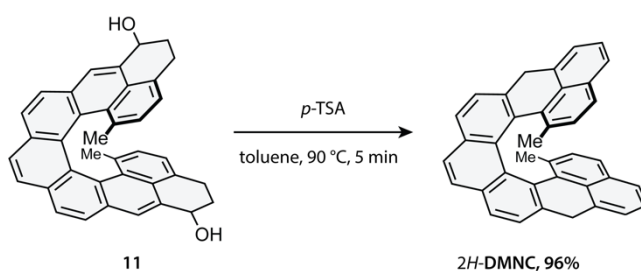

(±)-1,20-Dimethyl-7,14-dihydrobenzo[no]benzo[8,9]anthra[1,2-*a*]tetraphene (**2H-DMNC**). *p*-Toluene-sulfonic acid monohydrate (9.30 mg, 48.9 μmol, 0.3 equiv.) was added to a hot (90 °C) solution of (±)-1,20-dimethyl-4,5,6,15,16,17-hexahydrobenzo[no]benzo[8,9]anthra[1,2-*a*]tetraphene-6,15-diol (**11**; 80.0 mg, 163 μmol, 1.0 equiv.) in toluene (15 mL) and the reaction mixture was heated at 90 °C for 5 min before it was cooled in an ice bath and passed through a pad of silica gel using argon-saturated toluene/hexane (1:1) as an eluent. Evaporation of the solvent afforded the desired product (71 mg, 96%) as a yellow solid (mp >173 °C decomposition). <sup>1</sup>H NMR (500 MHz, CD<sub>2</sub>Cl<sub>2</sub>, ppm): δ 7.71 (d, *J* = 7.7 Hz, 2H), 7.62 (s, 2H), 7.43 (dt, *J* = 7.7, 0.9 Hz, 2H), 7.24 (dd, *J* = 8.1, 6.7 Hz, 2H), 7.13 (dt, *J* = 8.1, 1.3 Hz, 2H), 7.07 (ddt, *J* = 6.7, 2.1, 1.1 Hz, 2H), 6.45 (d, *J* = 8.2 Hz, 2H), 6.33 (d, *J* = 8.2 Hz, 2H), 4.29 (d, *J* = 21.4 Hz, 2H), 4.14 (d, *J* = 21.4 Hz, 2H), 0.87 (s, 6H). <sup>13</sup>C NMR (126 MHz, CD<sub>2</sub>Cl<sub>2</sub>, ppm): δ 136.8, 132.7, 132.4, 132.1, 131.1 (2×), 130.6, 130.2, 129.5, 129.1, 126.9, 126.2, 126.1, 125.6, 124.7, 124.6, 122.2, 35.9, 20.6. IR: 2918, 2850, 1029, 832, 811, 778, 739, 557, 489 cm<sup>-1</sup>. HRMS (APCI) *m/z*: [M + H]<sup>+</sup> Calcd for C<sub>38</sub>H<sub>24</sub> 483.21073; Found 483.20980.

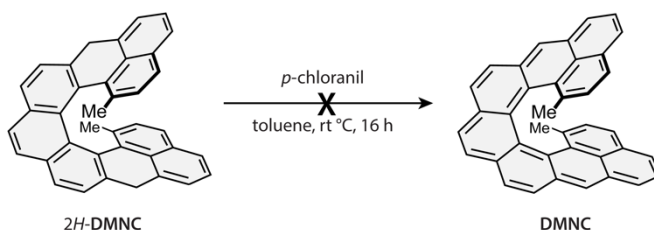

(±)-1,20-Dimethyl-7,14-dihydrobenzo[no]benzo[8,9]anthra[1,2-*a*]tetraphene (dimethylnonacethrene, **DMNC**). To a solution of (±)-1,20-dimethyl-7,14-dihydrobenzo[no]benzo[8,9]anthra[1,2-*a*]tetraphene (**2H-DMNC**; 7.00 mg, 14.5 μmol, 1.0 equiv.) in argon-saturated toluene (3 mL), *p*-chloranil (5.35 mg, 21.8 μmol, 1.5 equiv.) was added before the mixture was stirred for 16 h. The resulting dark precipitate was filtered, washed with CH<sub>2</sub>Cl<sub>2</sub>, and dried *in vacuo*. Due to the limited solubility of the resulting powder, the structure and identity of this compound could not be determined.

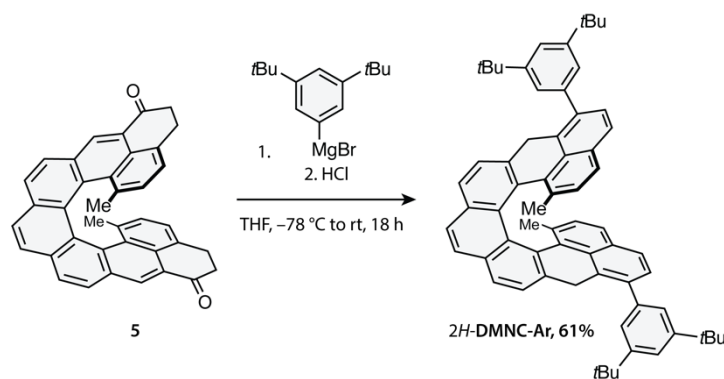

(±)-6,15-Bis(3,5-di-tert-butylphenyl)-1,20-dimethyl-7,14-dihydrobenzo[no]benzo[8,9]anthra[1,2-a]tetraphene (**2H-DMNC-Ar**). To a cooled mixture of 1,20-dimethyl-4,5,16,17-tetrahydrobenzo[no]benzo[8,9]anthra[1,2-a]tetraphene-6,15-dione (**5**; 19.5 mg, 0.0379 mmol, 1.0 equiv.) and cerium(III) chloride (17 mg, 0.069 mmol, 1.8 equiv.) in a LiCl solution (0.5 M in THF, 5 mL) at  $-78\text{ }^{\circ}\text{C}$ , a solution of 3,5-di-tert-butylphenyl magnesium bromide (0.2 M in 0.5 M LiCl in THF, 1.0 mL, 0.20 mmol, 5.5 equiv.) was added dropwise before the mixture was slowly allowed to warm to room temperature over 16 h. Then, the mixture was poured into aq. HCl (2 M), extracted with  $\text{CH}_2\text{Cl}_2$ , dried over  $\text{MgSO}_4$ , and filtered. After evaporation of the solvents, the residue was purified by column chromatography over silica gel using  $\text{CH}_3\text{Cl}$  as an eluent to afford the desired product (19.8 mg, 61%) as a yellow solid (mp  $84.2\text{--}86.1\text{ }^{\circ}\text{C}$ ).  $^1\text{H}$  NMR (500 MHz,  $\text{C}_6\text{D}_6$ , ppm):  $\delta$  7.70 (d,  $J = 2.0$  Hz, 2H), 7.61 (s, 4H), 7.45 (d,  $J = 8.2$  Hz, 2H), 7.41 (d,  $J = 1.8$  Hz, 2H), 7.38 (d,  $J = 7.7$  Hz, 2H), 7.25 (d,  $J = 8.3$  Hz, 2H), 6.91 (d,  $J = 7.7$  Hz, 2H), 6.86 (d,  $J = 8.3$  Hz, 2H), 6.75 (d,  $J = 8.3$  Hz, 2H), 4.48 (d,  $J = 21.1$  Hz, 2H), 3.78 (d,  $J = 21.1$  Hz, 2H), 1.48 (s, 36H), 1.12 (s, 6H).  $^{13}\text{C}$  NMR (126 MHz,  $\text{C}_6\text{D}_6$ , ppm):  $\delta$  151.2, 142.5, 137.1, 137.0, 132.6, 132.1, 131.8, 131.7, 131.1, 131.0, 129.5, 129.1, 127.1, 126.9, 126.1 (2 $\times$ ), 126.0, 125.9, 125.2, 124.5, 120.9, 35.2, 34.7, 31.8, 21.0. IR: 2954, 1594, 1363, 1304, 1214, 953, 852, 705  $\text{cm}^{-1}$ . HRMS (ESI)  $m/z$ :  $[M + H]^+$  Calcd for  $\text{C}_{66}\text{H}_{66}$  859.52373; Found 859.52336. The structure was additionally validated by SC-XRD (see X-Ray Crystallography section).

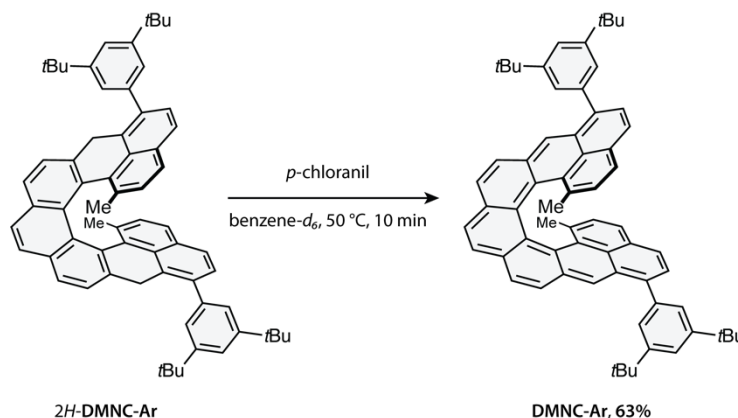

(±)-1,20-Dimethylbenzo[no]benzo[8,9]anthra[1,2-a]tetraphene (**DMNC-Ar**). To a solution of 6,15-bis(3,5-di-tert-butylphenyl)-1,20-dimethyl-7,14-dihydrobenzo[no]benzo[8,9]anthra[1,2-a]tetraphene (**2H-DMNC-Ar**; 6.0 mg, 7.0  $\mu\text{mol}$ , 1.0 equiv.) in argon-saturated benzene- $d_6$  (0.5 mL) in an NMR tube, an argon-saturated solution of *p*-chloranil (0.05 M in benzene- $d_6$ , 210  $\mu\text{L}$ , 10.4  $\mu\text{mol}$ , 1.5 equiv.) was added before the mixture was heated at  $50\text{ }^{\circ}\text{C}$  in a water bath for 10 min. The crude mixture was purified by column chromatography over silica gel using toluene as an eluent to obtain the desired product (3.76 mg, 63%) as a deep-purple solid (mp  $95.8\text{--}97.1\text{ }^{\circ}\text{C}$ ). IR: 2953, 2923, 1408, 1307, 1201, 883, 715  $\text{cm}^{-1}$ . HRMS (APCI)  $m/z$ :  $[M + H]^+$  Calcd for  $\text{C}_{66}\text{H}_{64}$  857.50808; Found 857.50771.

## NMR Assignments

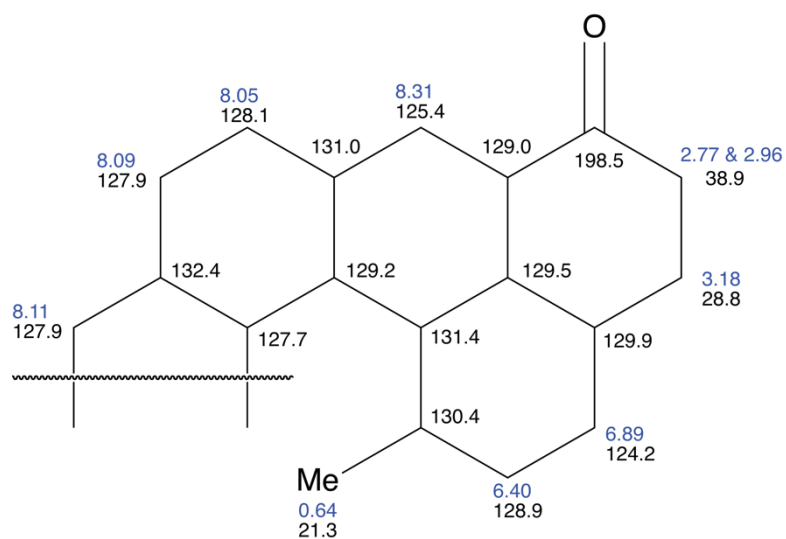

**Figure S2:** Assignment of  $^1\text{H}$  (blue) and  $^{13}\text{C}$  (black) NMR resonances (in ppm) of **5**.  $\pi$ -Bonds are omitted for clarity.

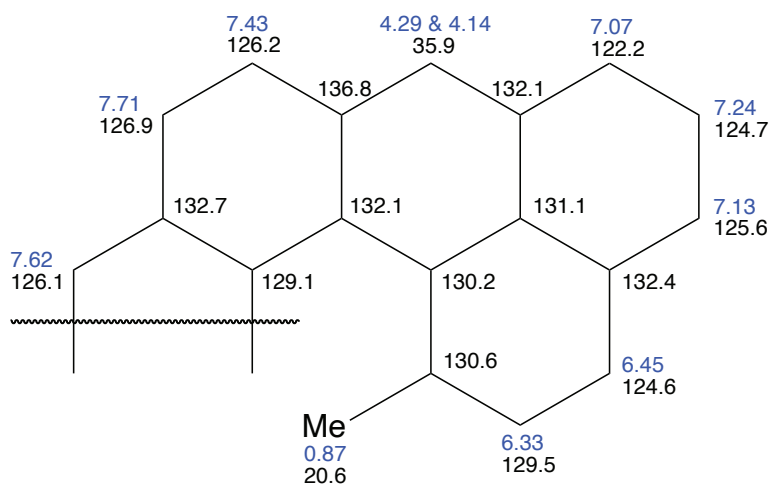

**Figure S3:** Assignment of  $^1\text{H}$  (blue) and  $^{13}\text{C}$  (black) NMR resonances (in ppm) of **2H-DMNC**.  $\pi$ -Bonds are omitted for clarity.

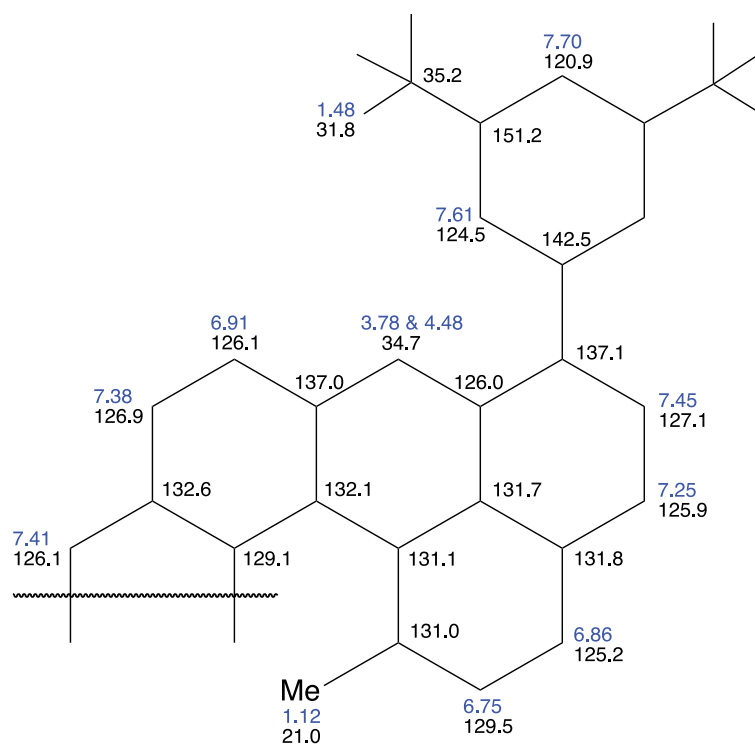

**Figure S4:** Assignment of  $^1\text{H}$  (blue) and  $^{13}\text{C}$  (black) NMR resonances (in ppm) of 2H-DMNC-Ar.  $\pi$ -Bonds are omitted for clarity.

## Copies of NMR Spectra

$^1\text{H}$  NMR / 400 MHz /  $\text{CDCl}_3$

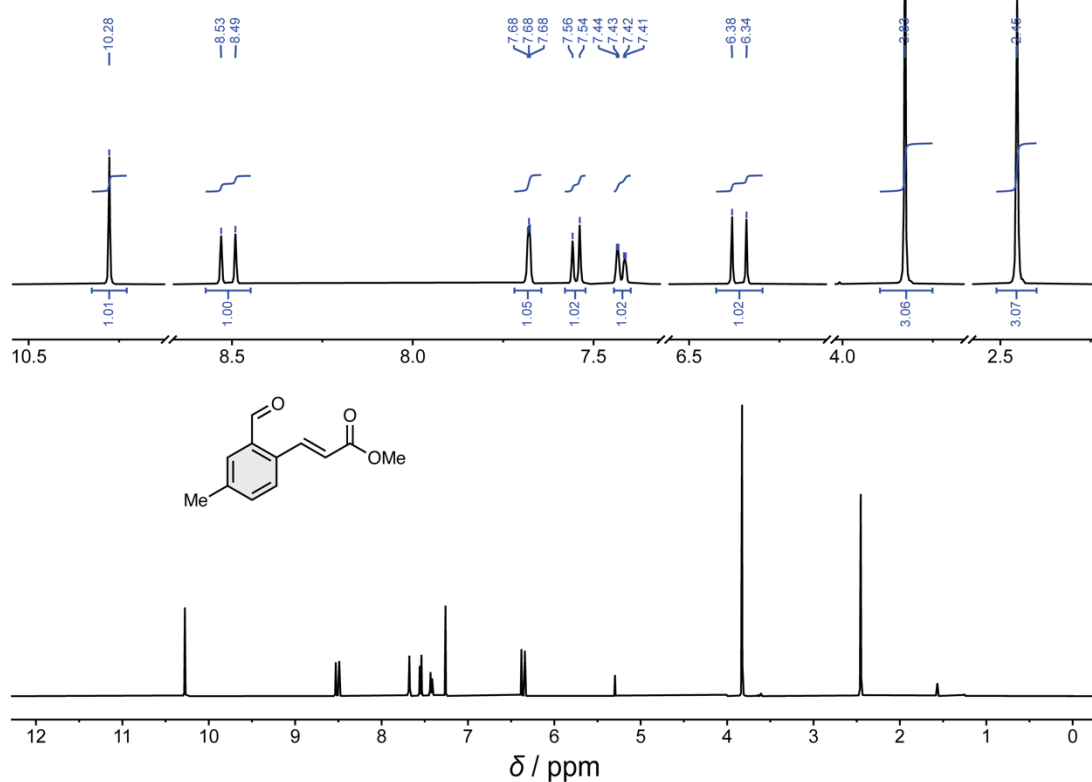

Figure S5:  $^1\text{H}$  NMR spectrum of **6**.

$^{13}\text{C}$  NMR / 101 MHz /  $\text{CDCl}_3$

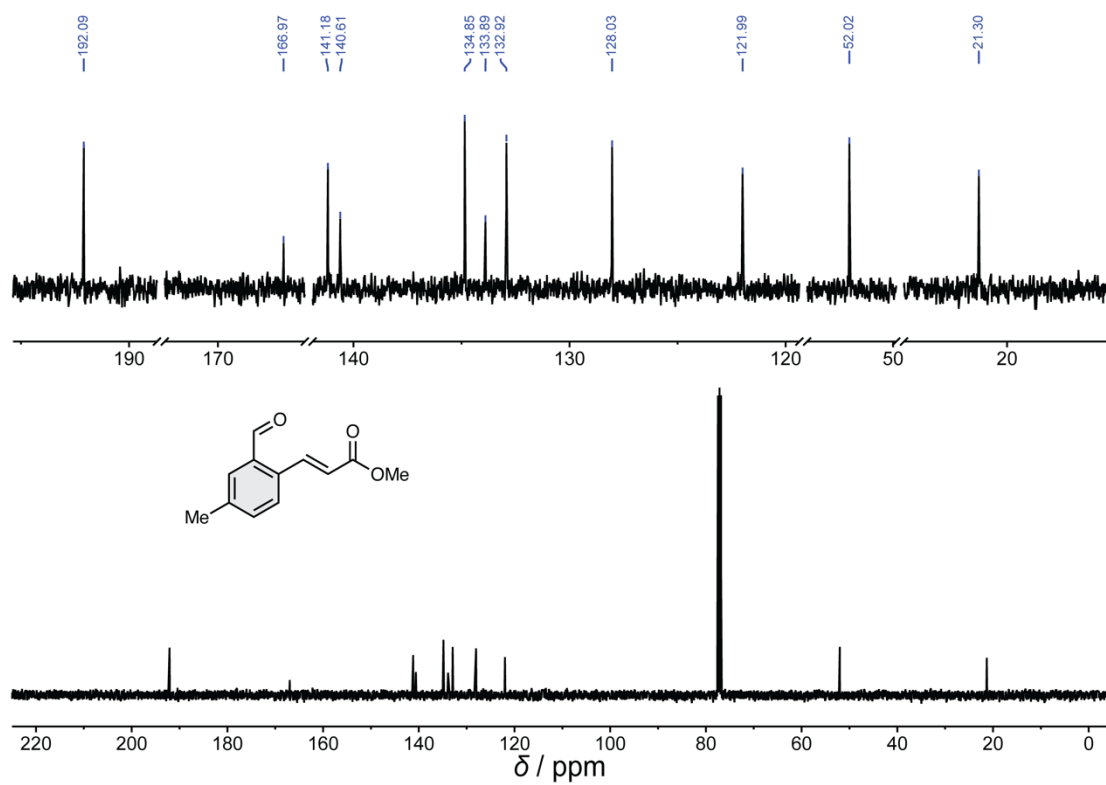

Figure S6:  $^{13}\text{C}$  NMR spectrum of **6**.

$^1\text{H}$  NMR / 400 MHz /  $\text{CDCl}_3$

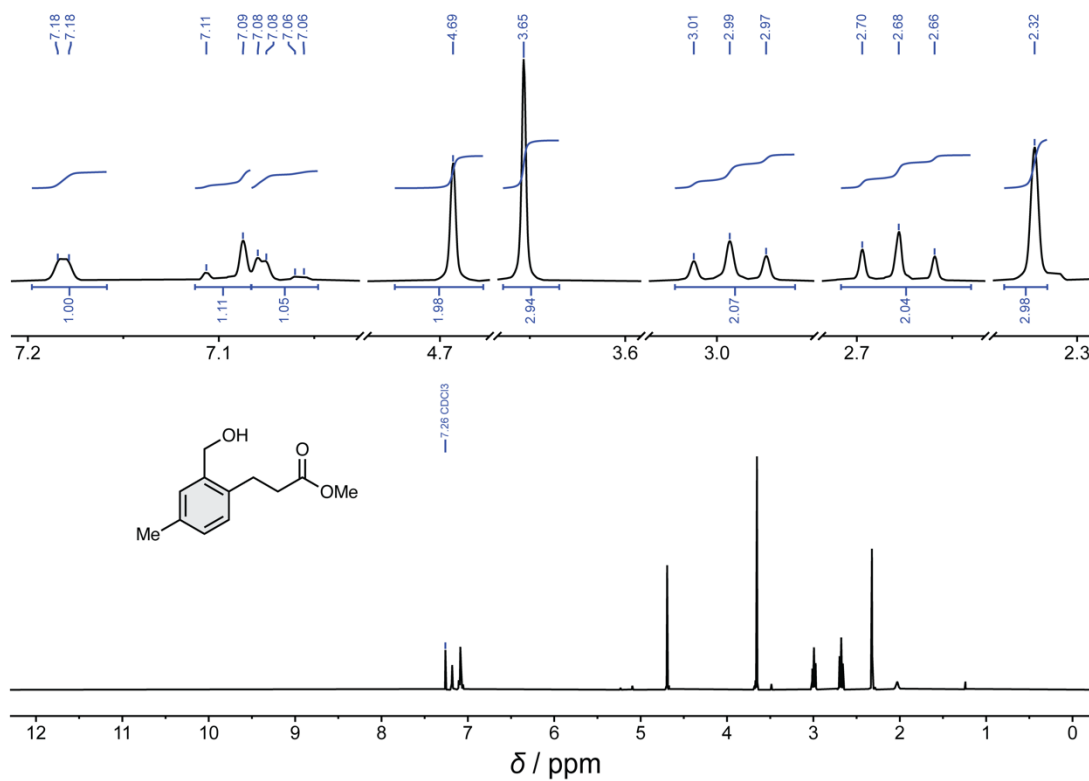

Figure S7:  $^1\text{H}$  NMR spectrum of 7.

$^{13}\text{C}$  NMR / 101 MHz /  $\text{CDCl}_3$

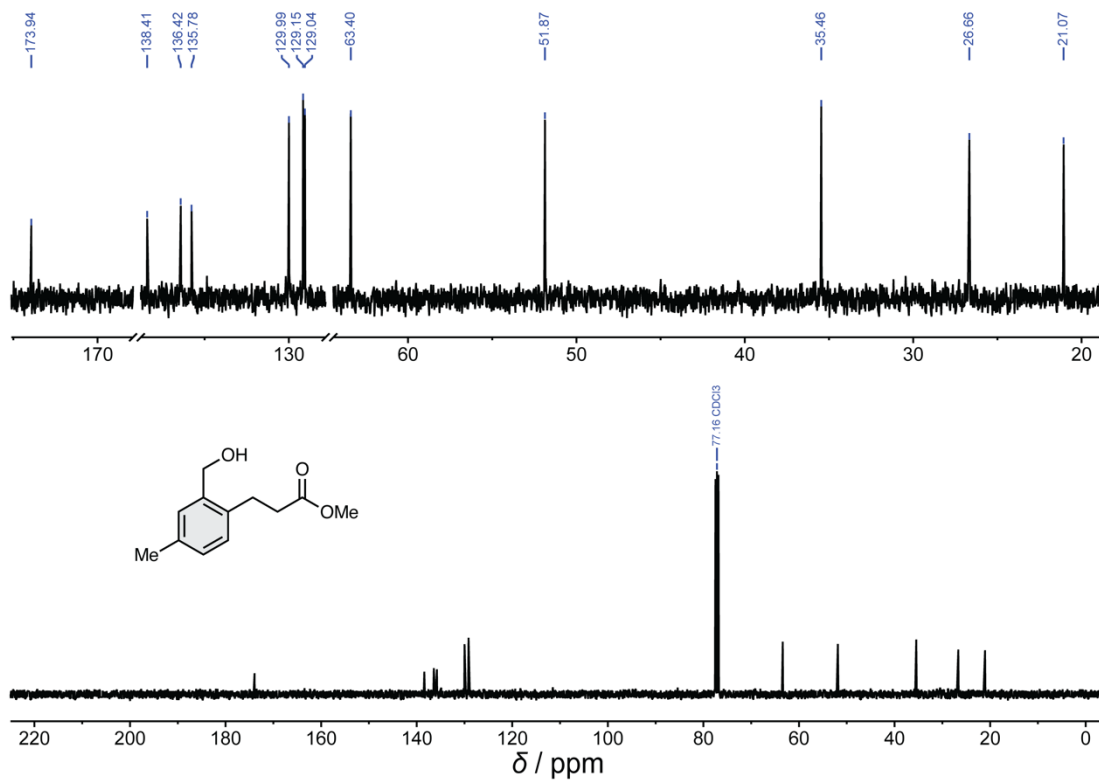

Figure S8:  $^{13}\text{C}$  NMR spectrum of 7.

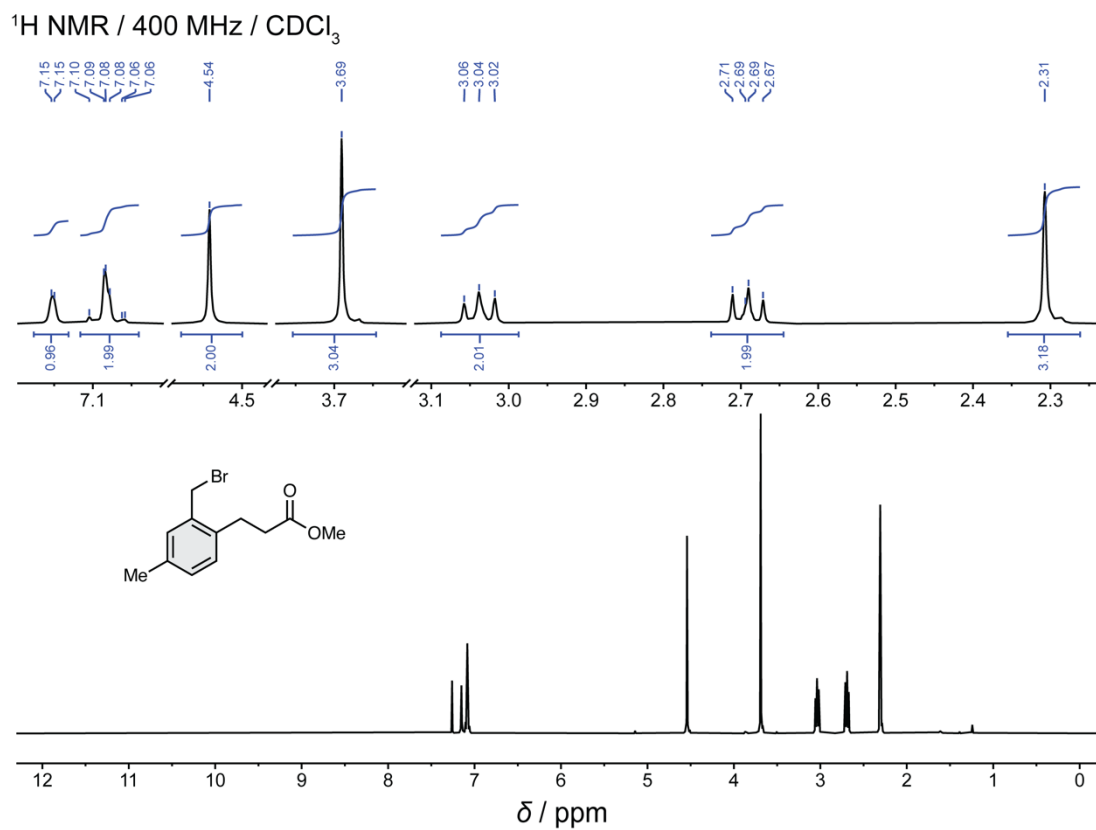

Figure S9:  $^1\text{H NMR}$  spectrum of **8**.

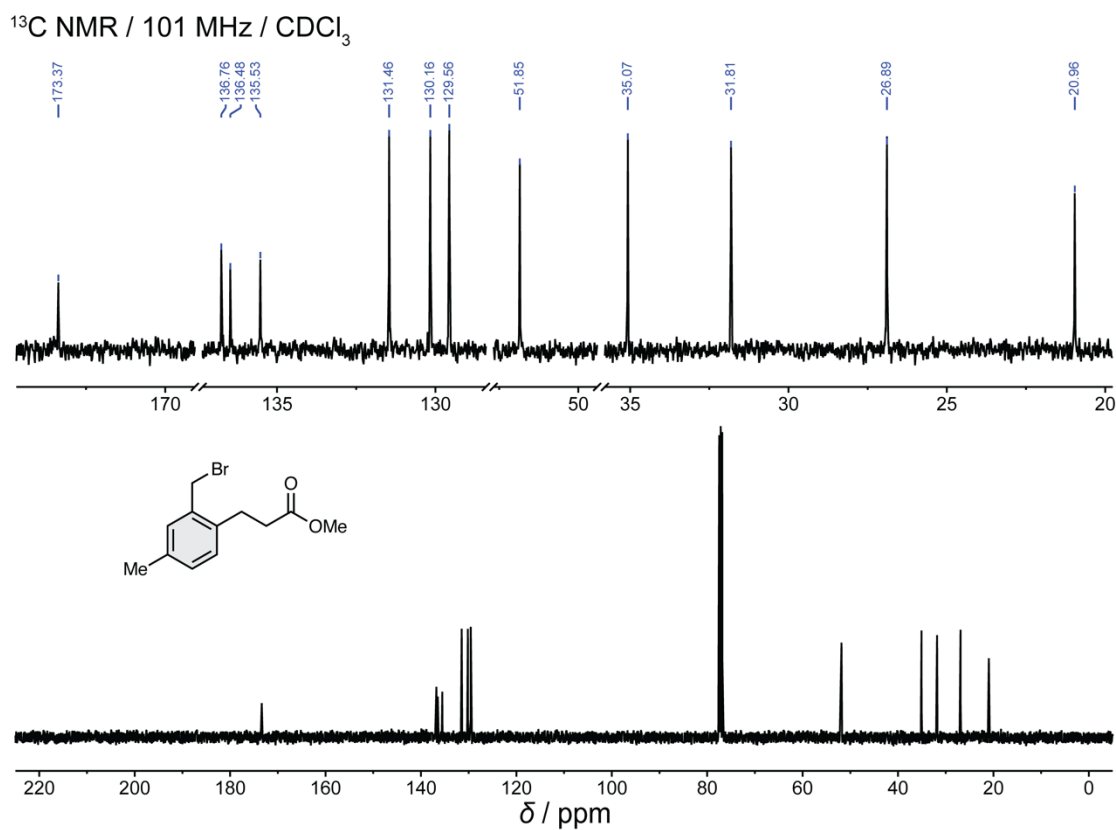

Figure S10:  $^{13}\text{C NMR}$  spectrum of **8**.



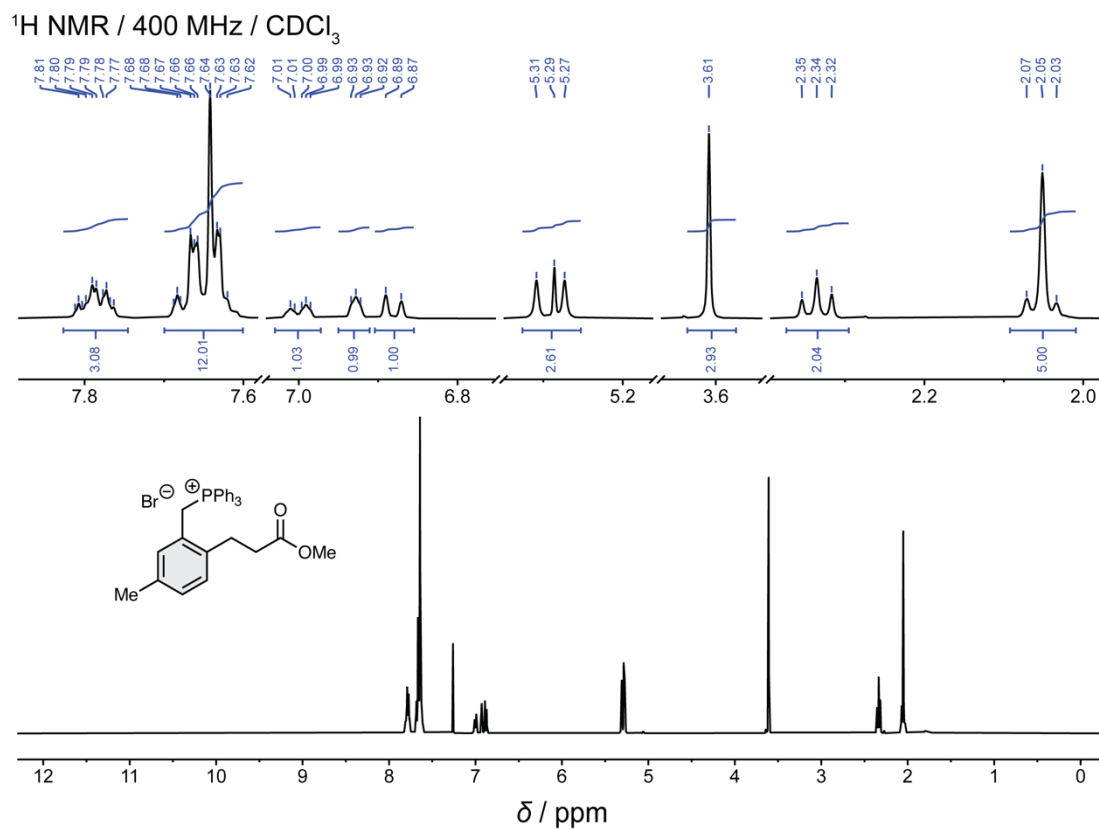

Figure S11: <sup>1</sup>H NMR spectrum of **2**.

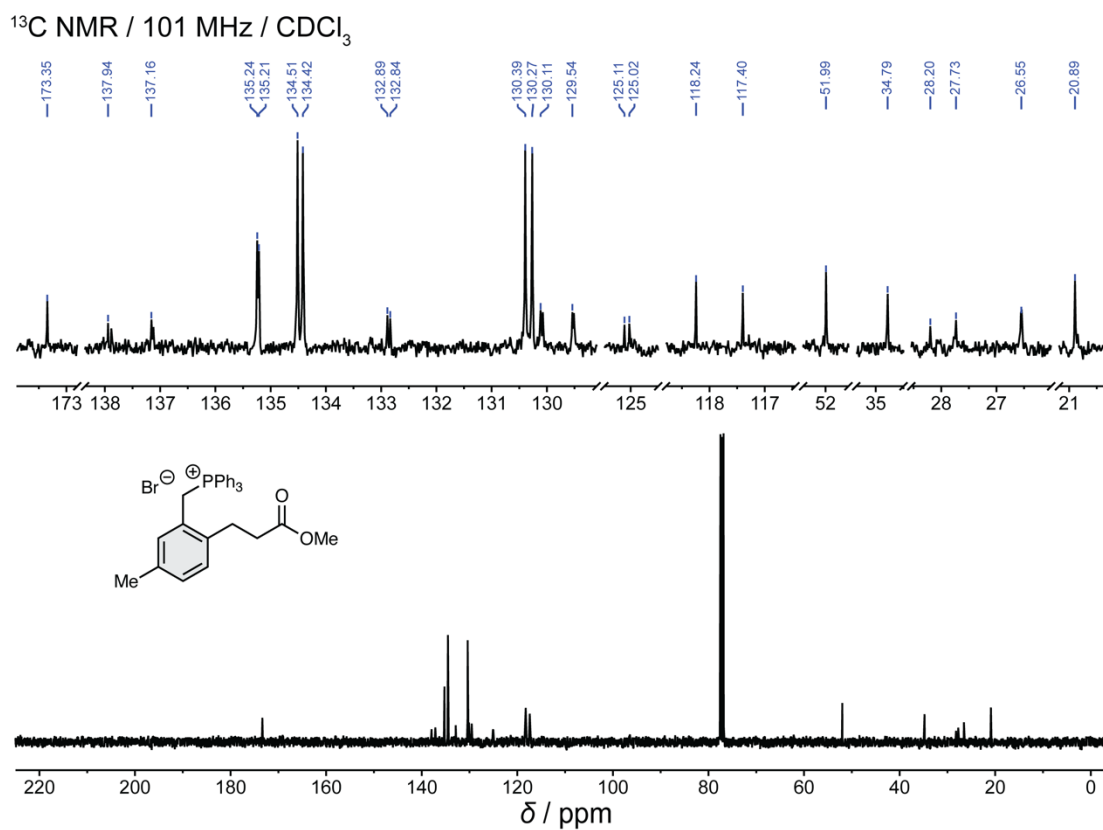

Figure S12: <sup>13</sup>C NMR spectrum of **2**.

$^{31}\text{P}$  NMR / 162 MHz /  $\text{CDCl}_3$

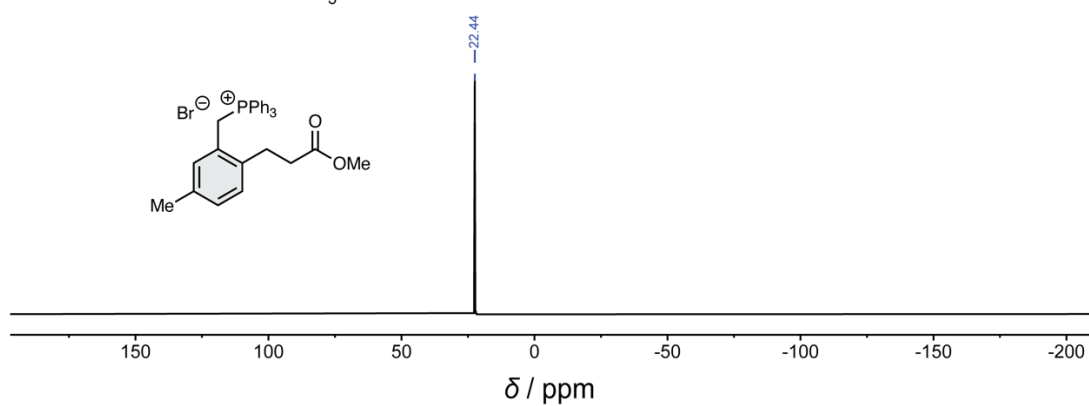

Figure S13:  $^{31}\text{P}$  NMR spectrum of 2.

$^1\text{H}$  NMR / 400 MHz /  $\text{CD}_2\text{Cl}_2$

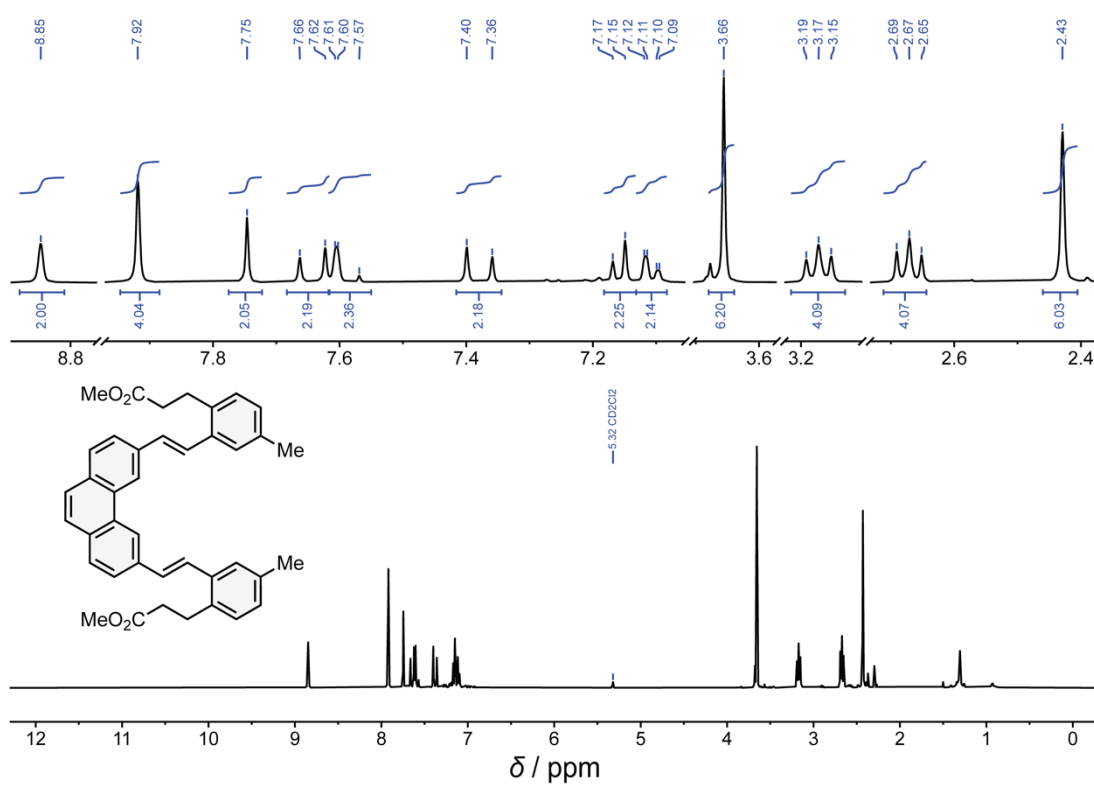

Figure S14:  $^1\text{H}$  NMR spectrum of 4.

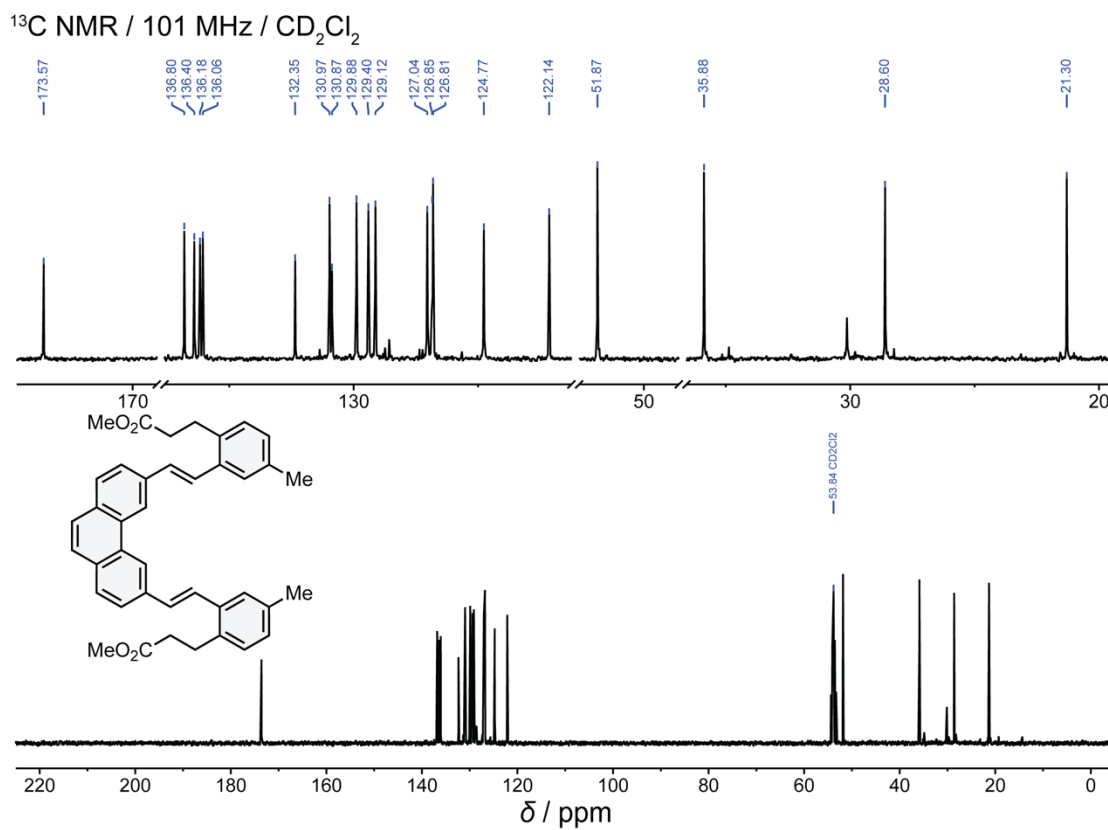

Figure S15:  $^{13}\text{C}$  NMR spectrum of **4**.

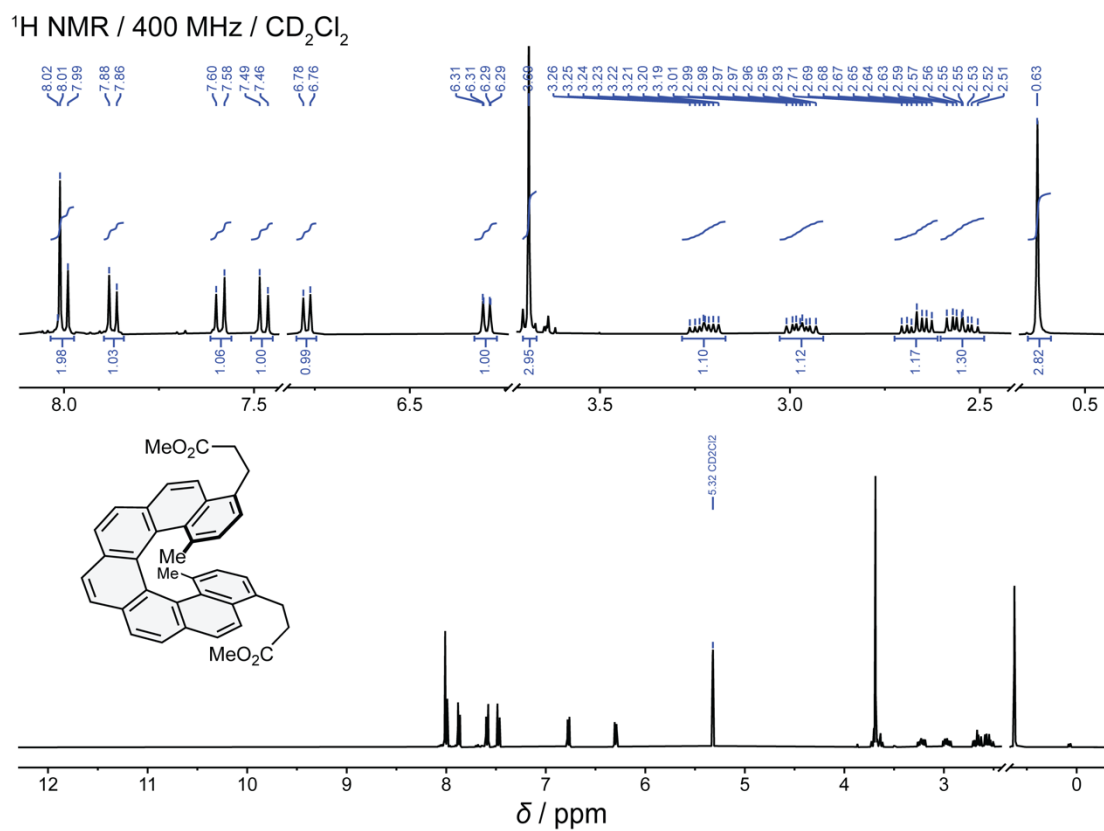

Figure S16:  $^1\text{H}$  NMR spectrum of **9**.

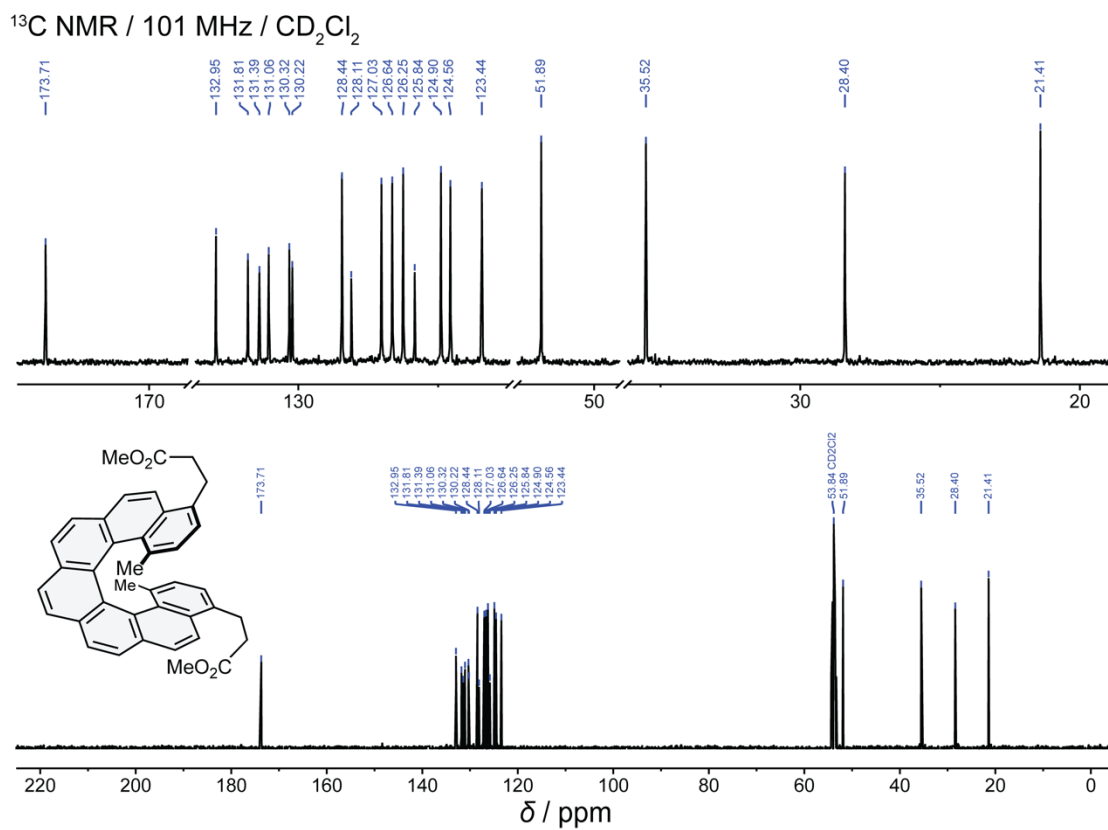

Figure S17:  $^{13}\text{C}$  NMR spectrum of **9**.

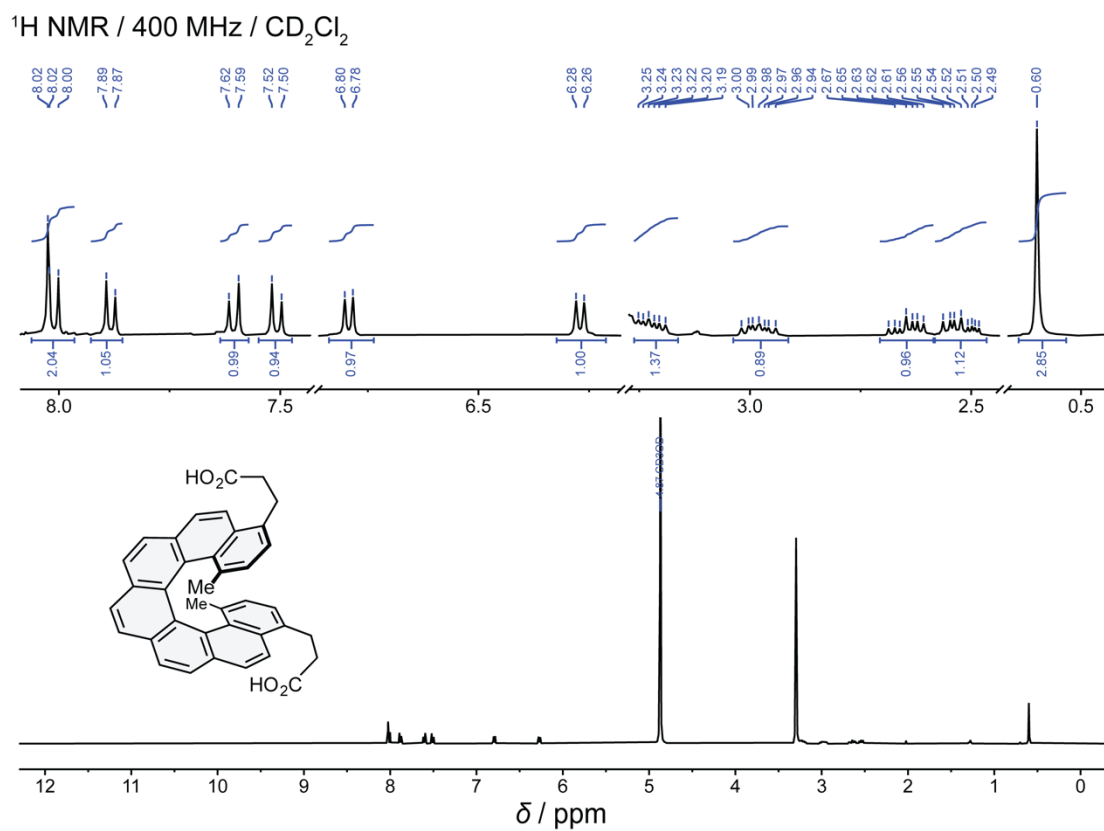

Figure S18:  $^1\text{H}$  NMR spectrum of **10**.

$^1\text{H}$  NMR / 400 MHz /  $\text{CD}_2\text{Cl}_2$

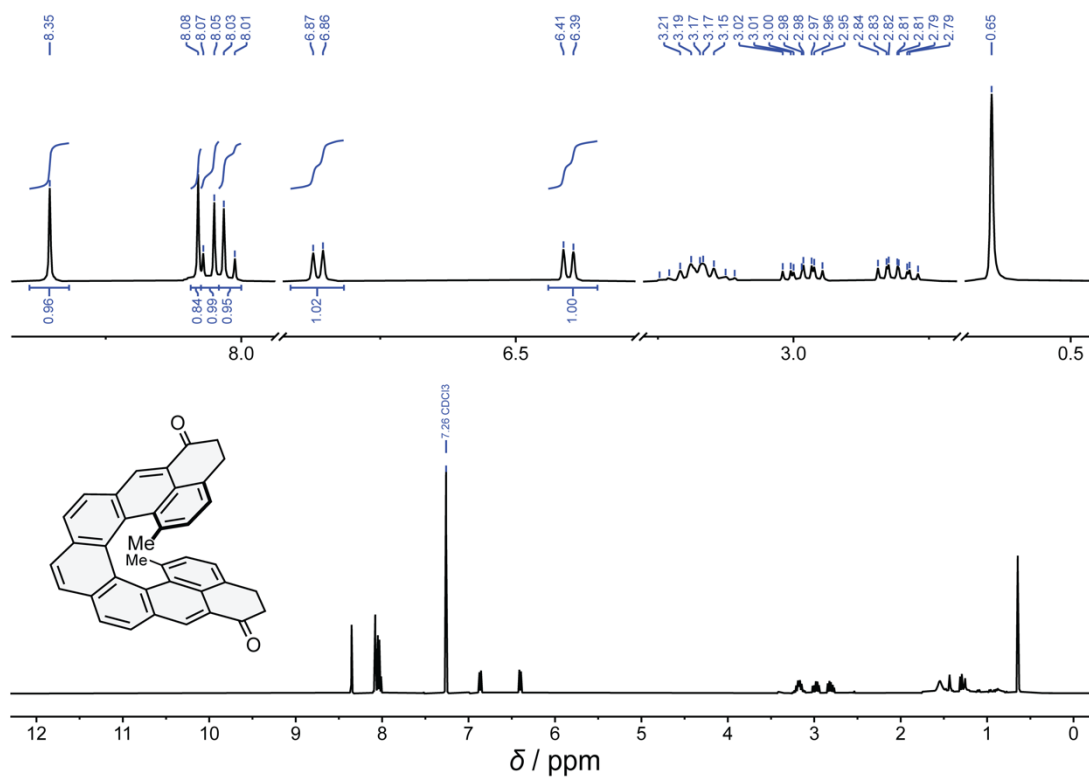

Figure S19:  $^1\text{H}$  NMR spectrum of 5.

$^{13}\text{C}$  NMR / 101 MHz /  $\text{CD}_2\text{Cl}_2$

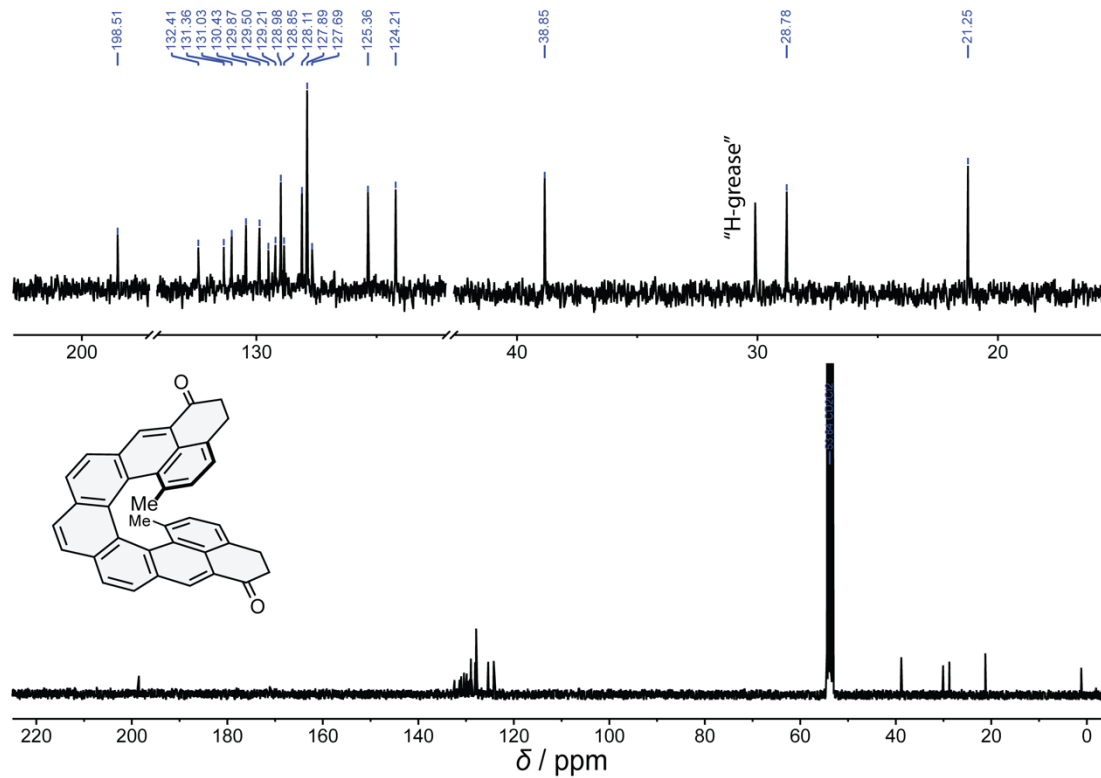

Figure S20:  $^{13}\text{C}$  NMR spectrum of 5.

$^1\text{H}$ - $^1\text{H}$  COSY NMR / 400 MHz /  $\text{CD}_2\text{Cl}_2$

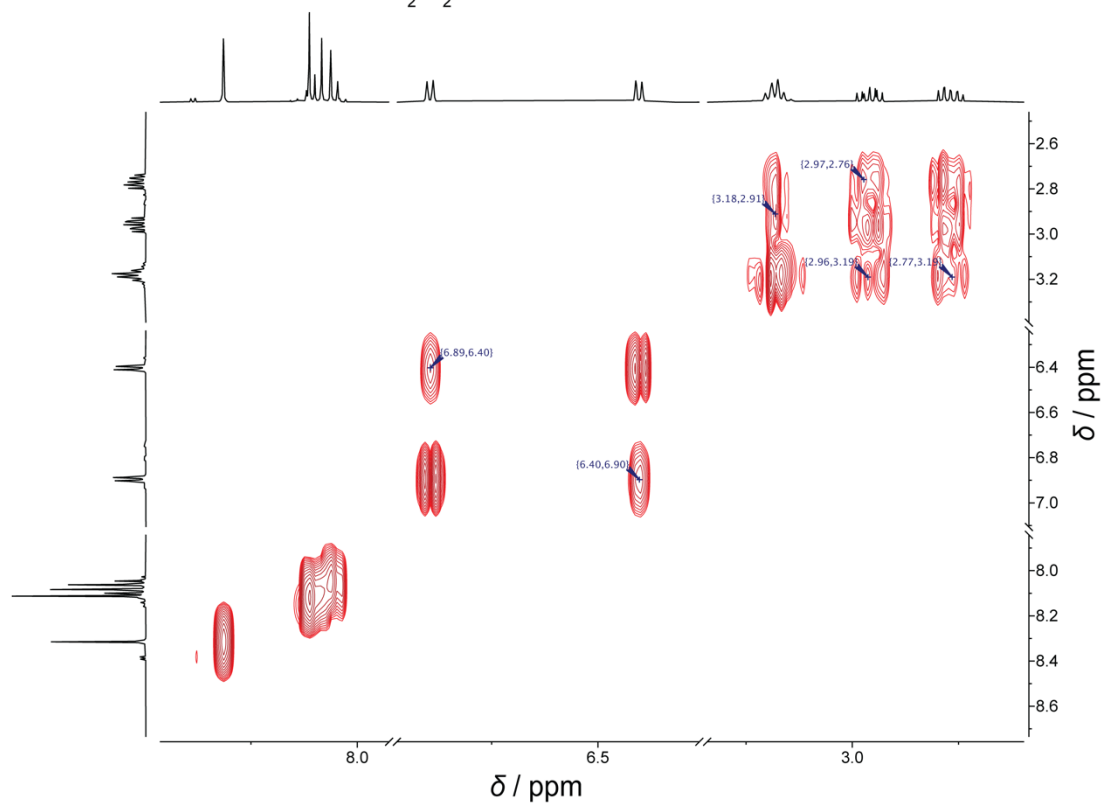

Figure S21:  $^1\text{H}$ - $^1\text{H}$  COSY spectrum of **5**.

$^1\text{H}$ - $^1\text{H}$  NOESY NMR / 400 MHz /  $\text{CD}_2\text{Cl}_2$

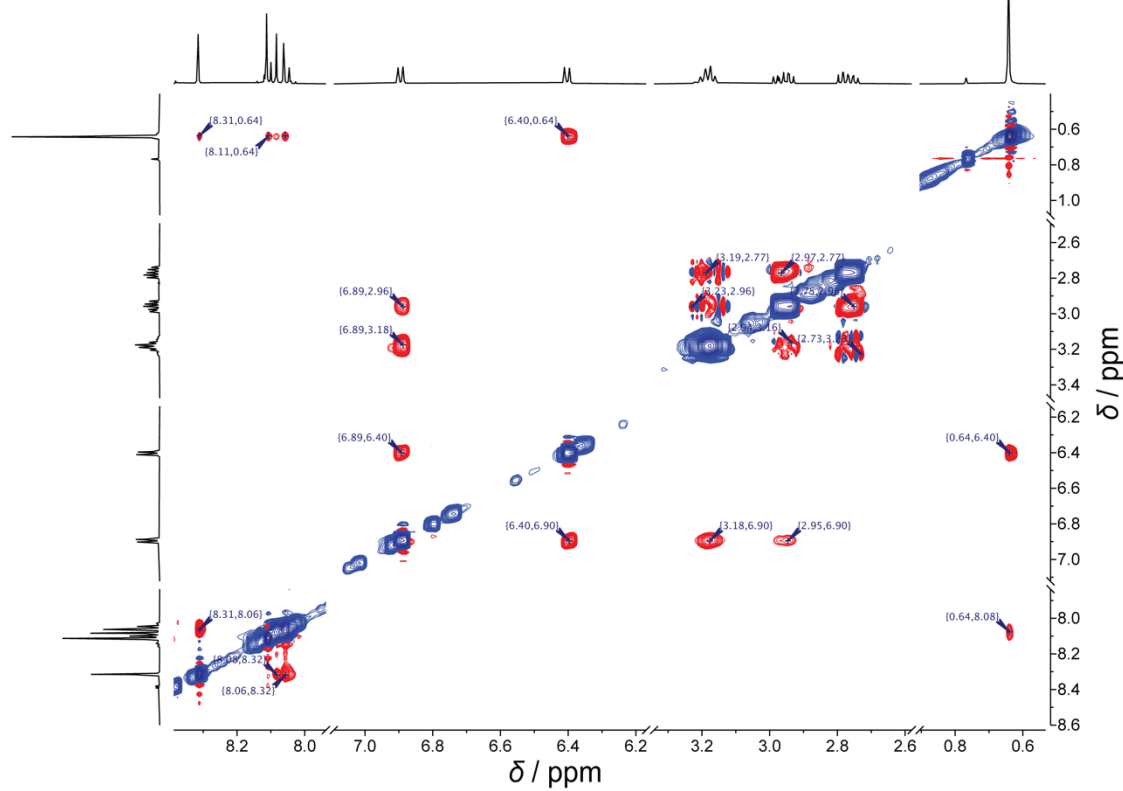

Figure S22:  $^1\text{H}$ - $^1\text{H}$  NOESY spectrum of **5**.

$^1\text{H}$ - $^{13}\text{C}$  HMQC NMR / 400 MHz /  $\text{CD}_2\text{Cl}_2$

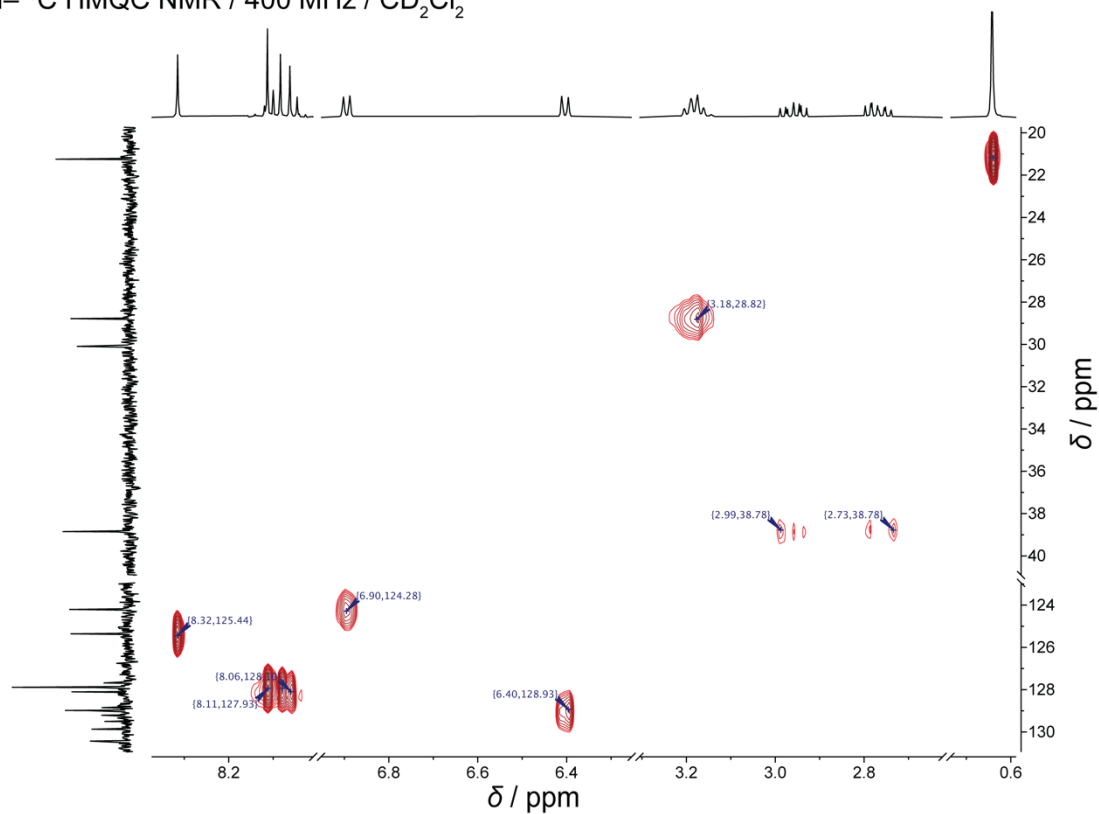

Figure S23:  $^1\text{H}$ - $^{13}\text{C}$  HMQC spectrum of **5**.

$^1\text{H}$ - $^{13}\text{C}$  HMBC NMR / 400 MHz /  $\text{CD}_2\text{Cl}_2$

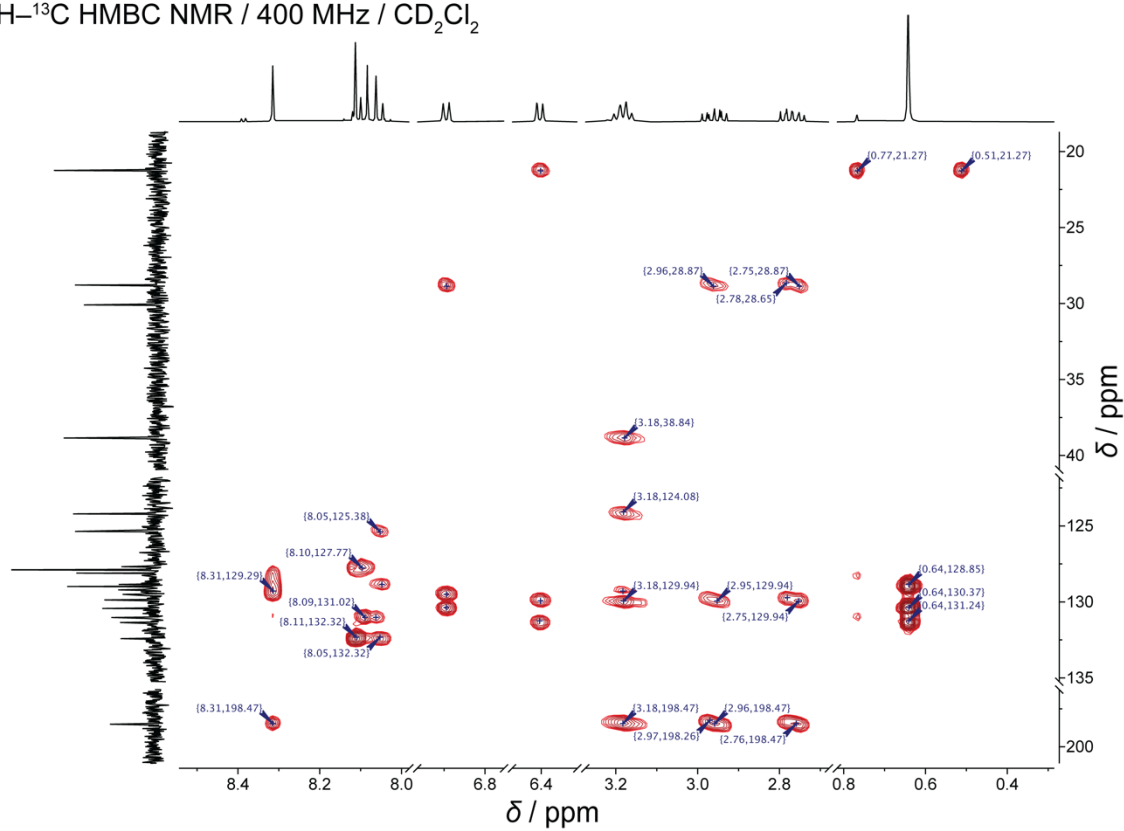

Figure S24:  $^1\text{H}$ - $^{13}\text{C}$  HMBC spectrum of **5**.

$^1\text{H}$  NMR / 500 MHz /  $\text{CD}_2\text{Cl}_2$

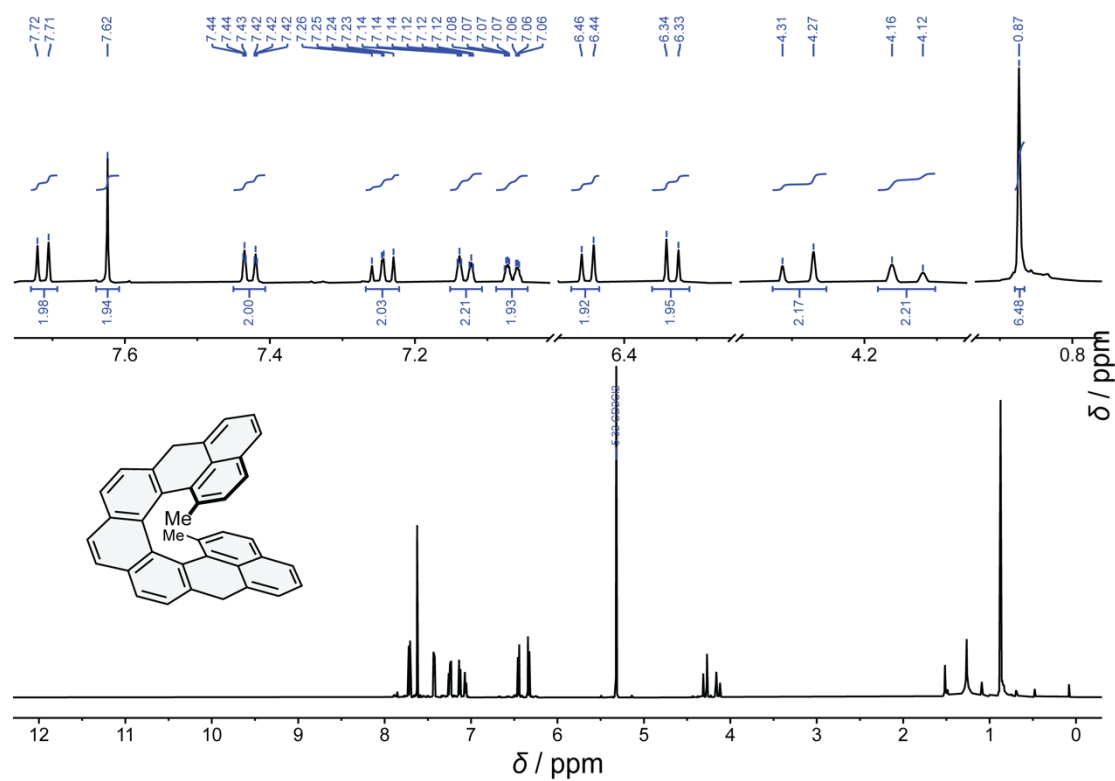

Figure S25:  $^1\text{H}$  NMR spectrum of 2H-DMNC.

$^1\text{H}$ - $^1\text{H}$  COSY NMR / 500 MHz /  $\text{CD}_2\text{Cl}_2$

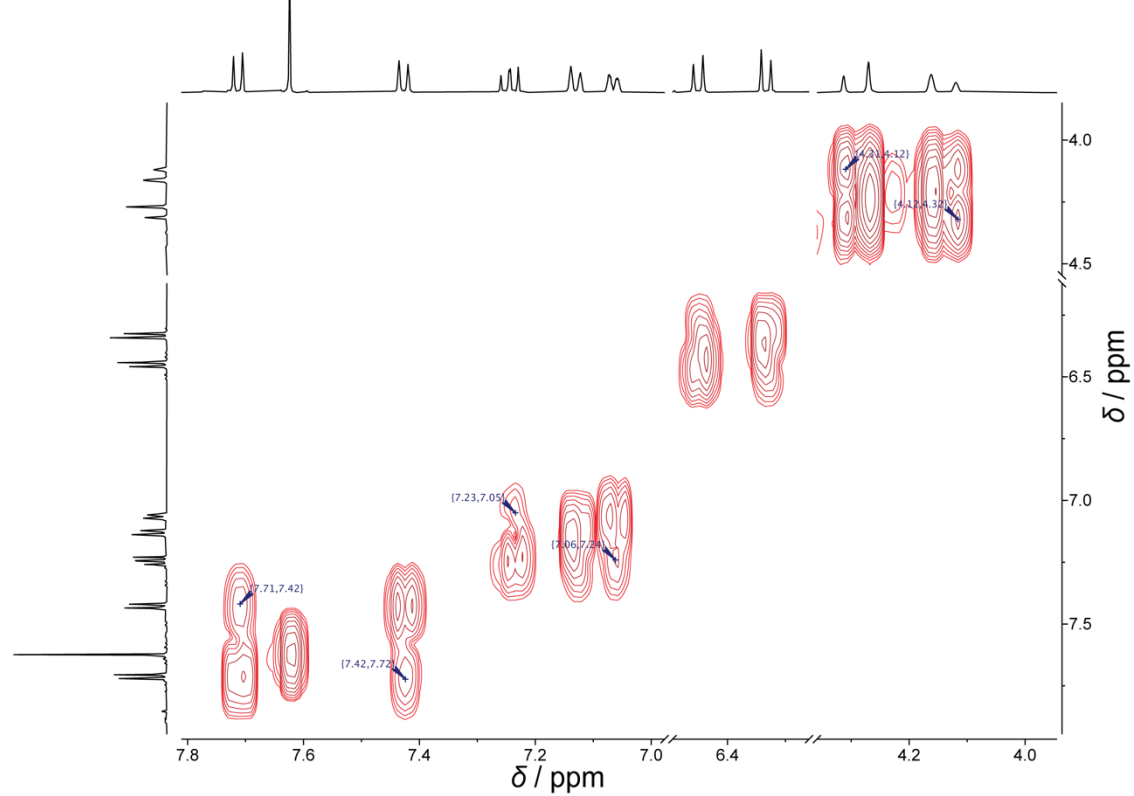

Figure S26:  $^1\text{H}$ - $^1\text{H}$  COSY spectrum of 2H-DMNC.



$^1\text{H}$ - $^1\text{H}$  NOESY NMR / 500 MHz /  $\text{CD}_2\text{Cl}_2$

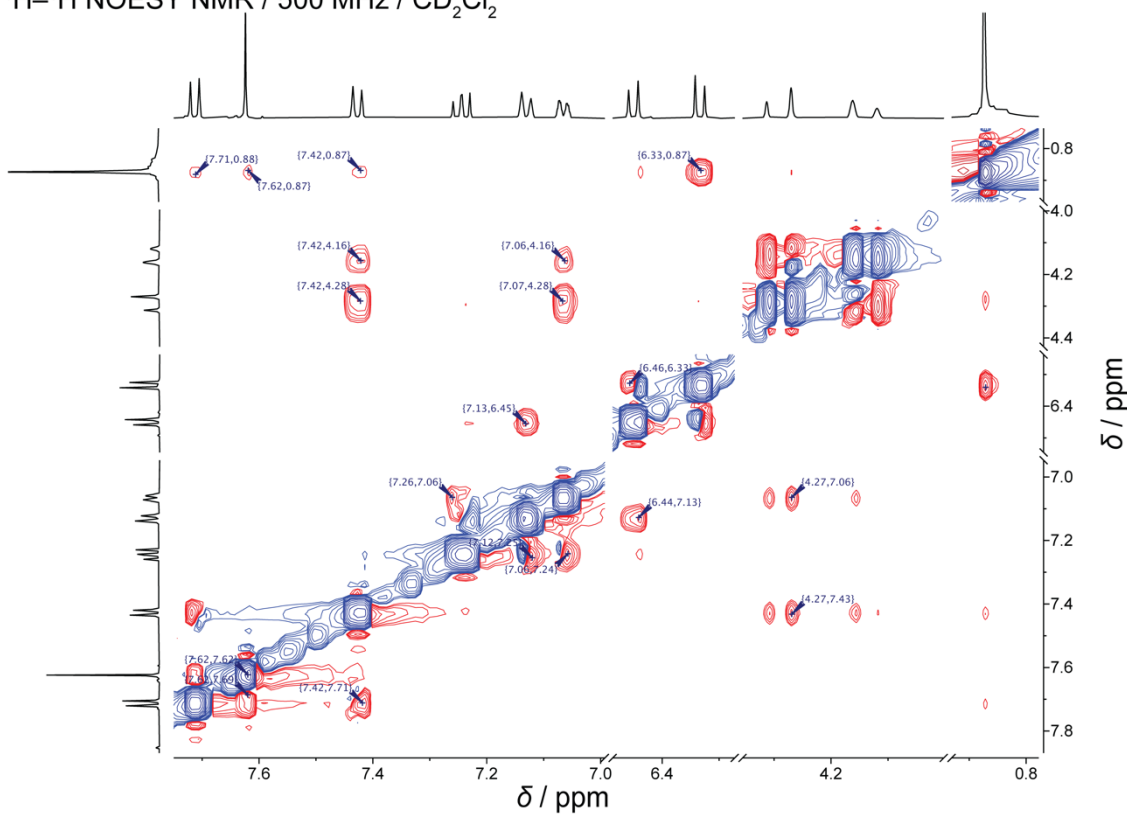

Figure S27:  $^1\text{H}$ - $^1\text{H}$  NOESY spectrum of 2H-DMNC.

$^1\text{H}$ - $^{13}\text{C}$  HMQC NMR / 500 MHz /  $\text{CD}_2\text{Cl}_2$

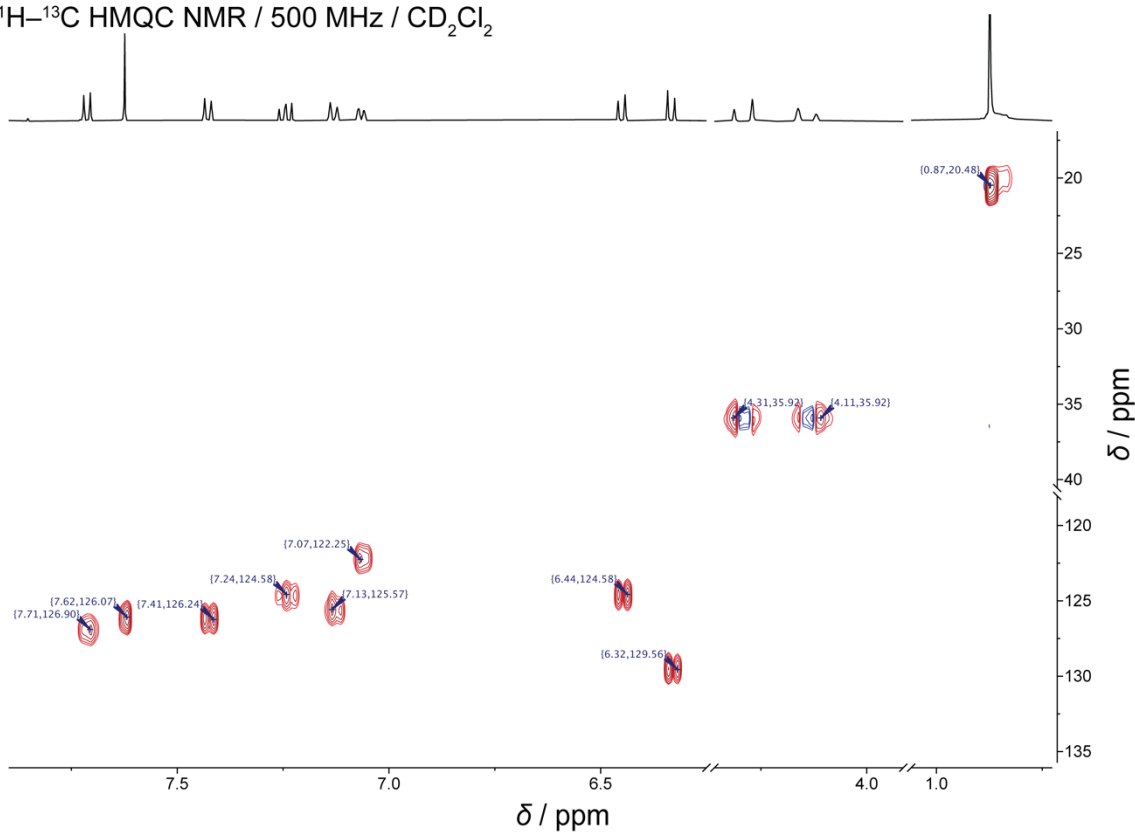

Figure S28:  $^1\text{H}$ - $^{13}\text{C}$  HMQC spectrum of 2H-DMNC.

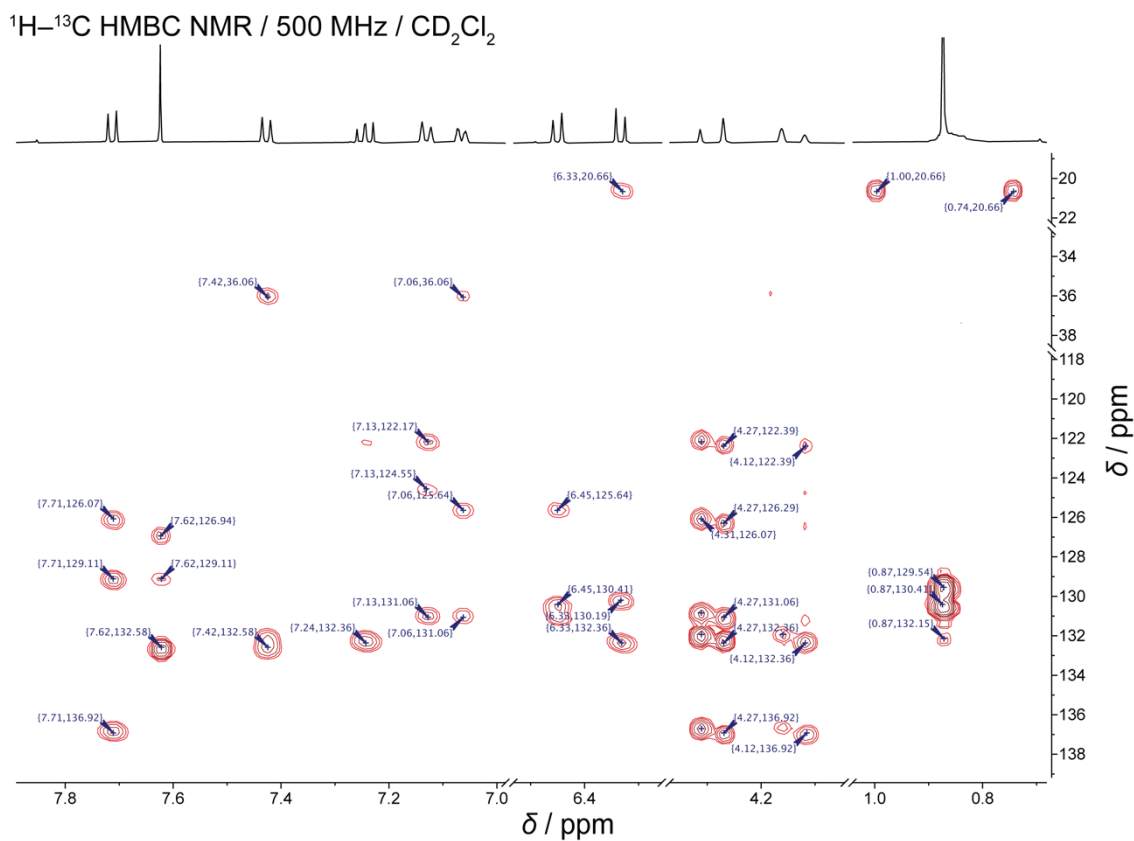

Figure S29:  $^1\text{H}-^{13}\text{C}$  HMBC spectrum of 2H-DMNC.

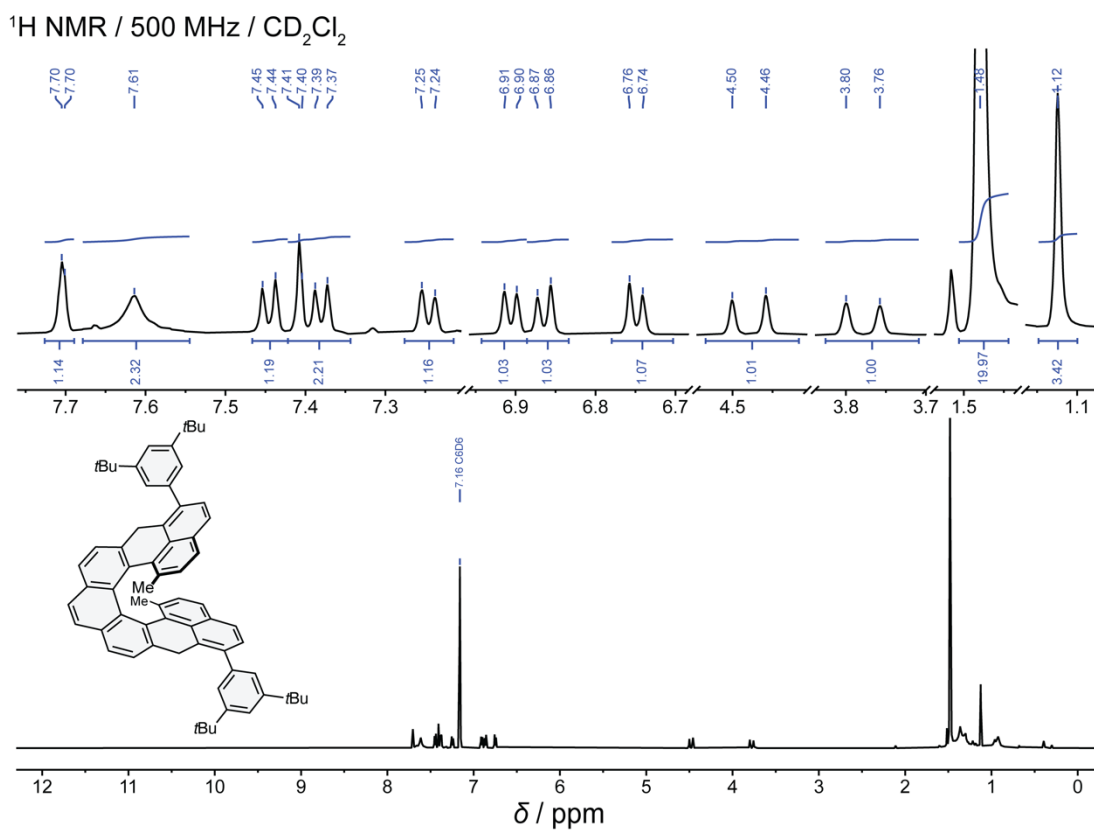

Figure S30:  $^1\text{H}$  NMR spectrum of 2H-DMNC-Ar.

$^{13}\text{C}$  NMR / 126 MHz /  $\text{CD}_2\text{Cl}_2$

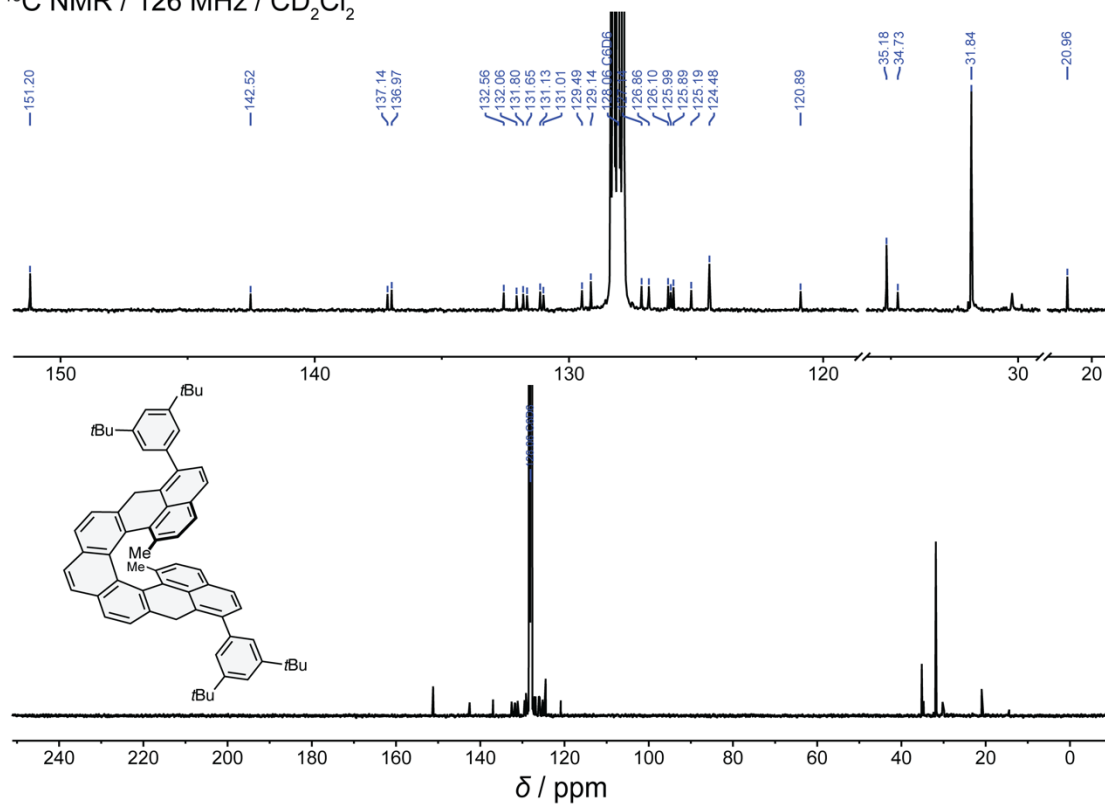

Figure S31:  $^{13}\text{C}$  NMR spectrum of *2H*-DMNC-Ar.

$^1\text{H}$ - $^1\text{H}$  COSY NMR / 500 MHz /  $\text{C}_6\text{D}_6$

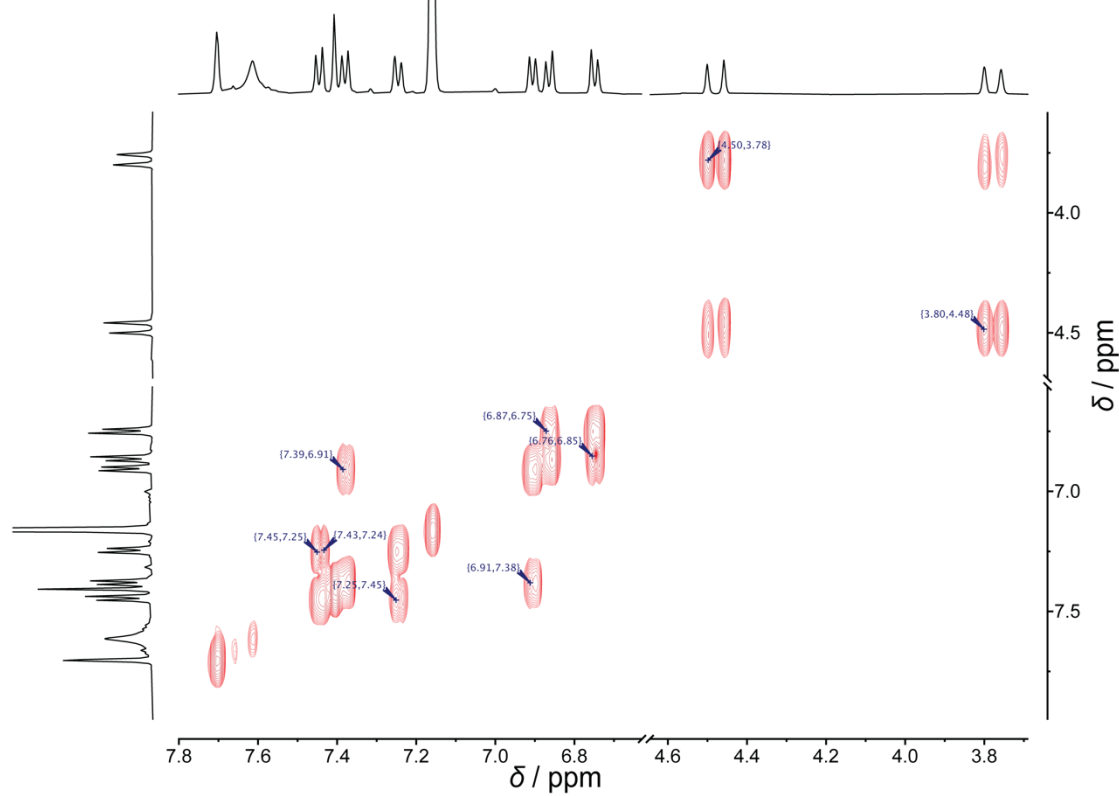

Figure S32:  $^1\text{H}$ - $^1\text{H}$  COSY NMR spectrum of *2H*-DMNC-Ar.

$^1\text{H}$ - $^1\text{H}$  ROESY NMR / 500 MHz /  $\text{C}_6\text{D}_6$

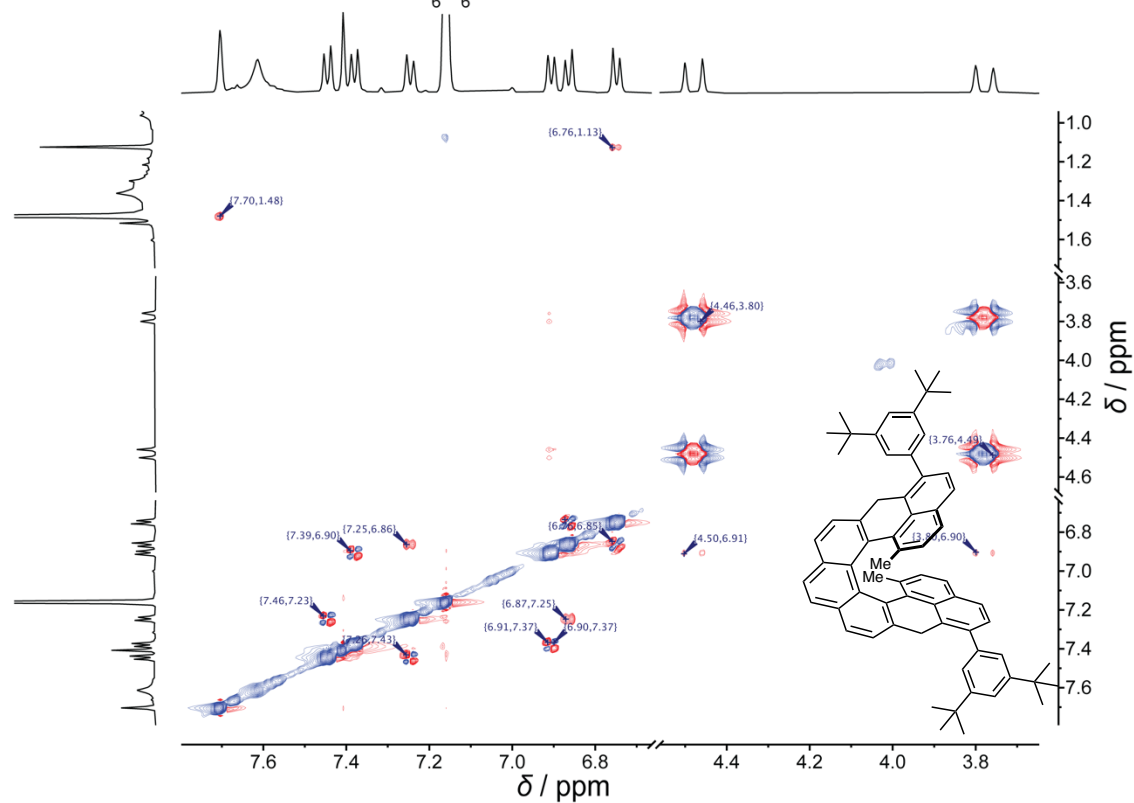

Figure S33:  $^1\text{H}$ - $^1\text{H}$  ROESY NMR spectrum of *2H*-DMNC-Ar.

$^1\text{H}$ - $^{13}\text{C}$  HSQC NMR / 500 MHz /  $\text{C}_6\text{D}_6$

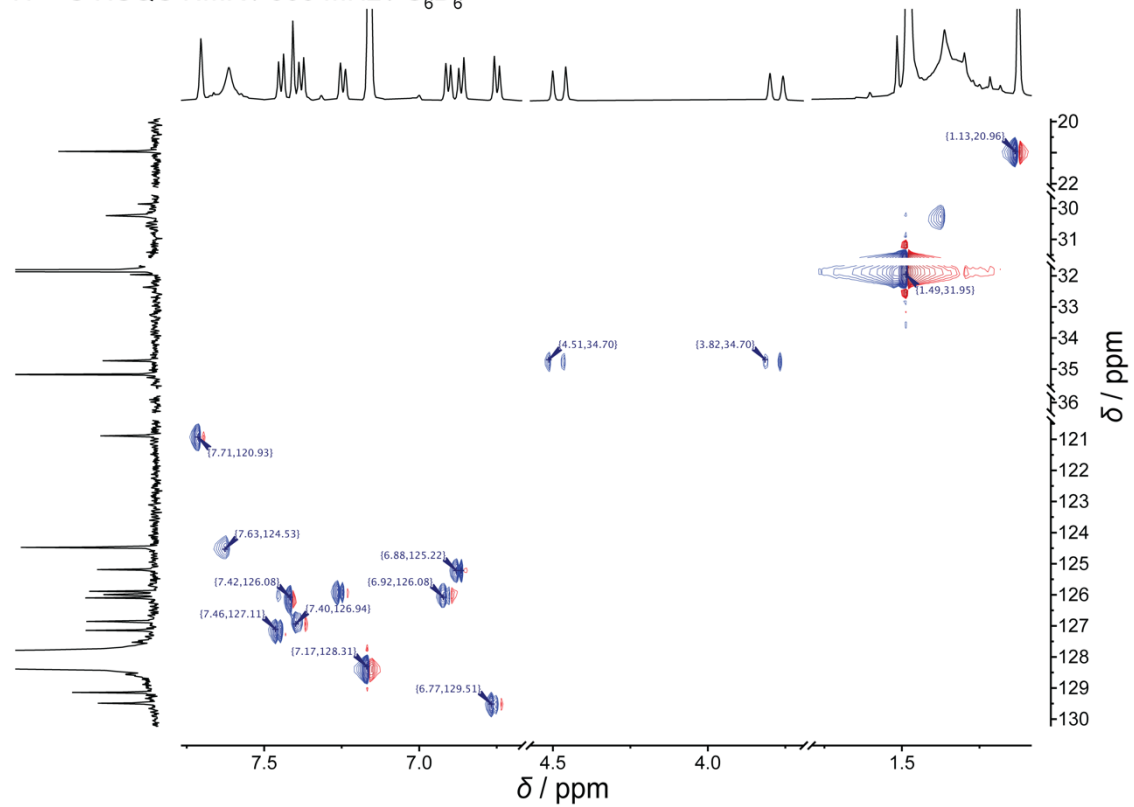

Figure S34:  $^1\text{H}$ - $^{13}\text{C}$  HSQC NMR spectrum of *2H*-DMNC-Ar.

$^1\text{H}$ - $^{13}\text{C}$  HMBC NMR / 500 MHz /  $\text{C}_6\text{D}_6$

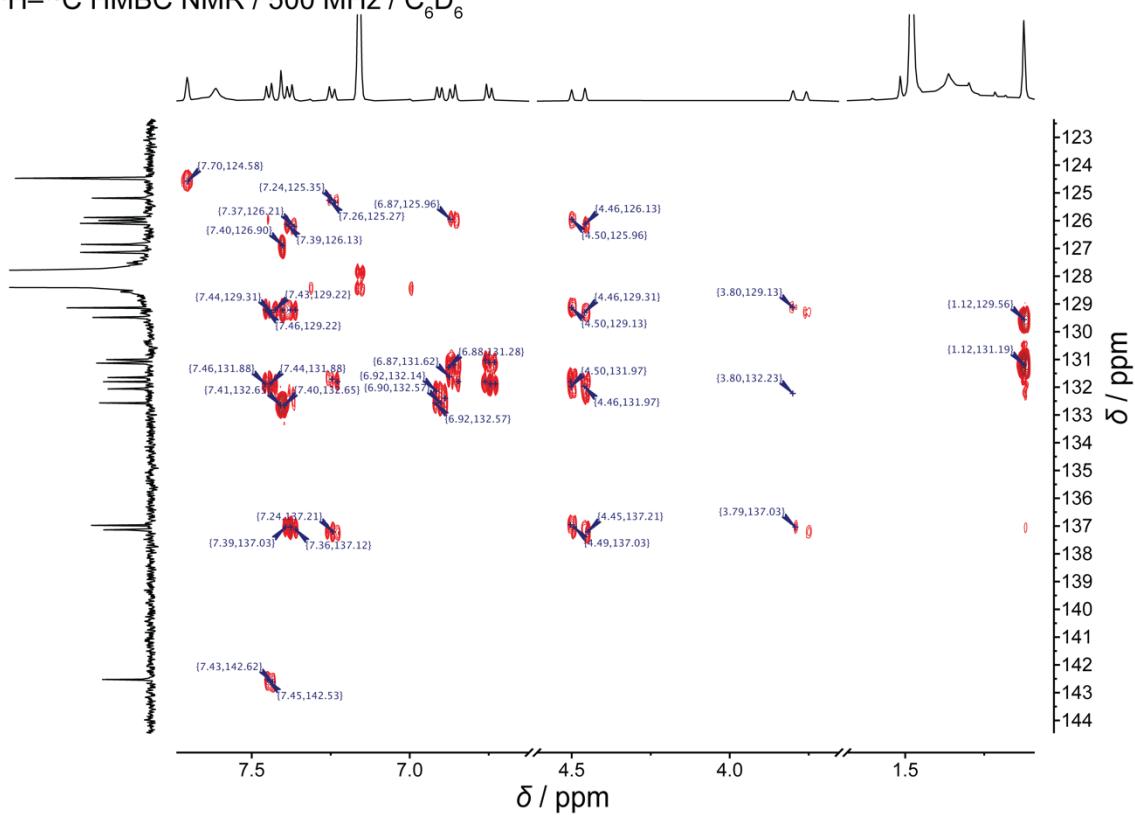

Figure S35:  $^1\text{H}$ - $^{13}\text{C}$  HMBC NMR spectrum of 2H-DMNC-Ar.

HR-MS Data

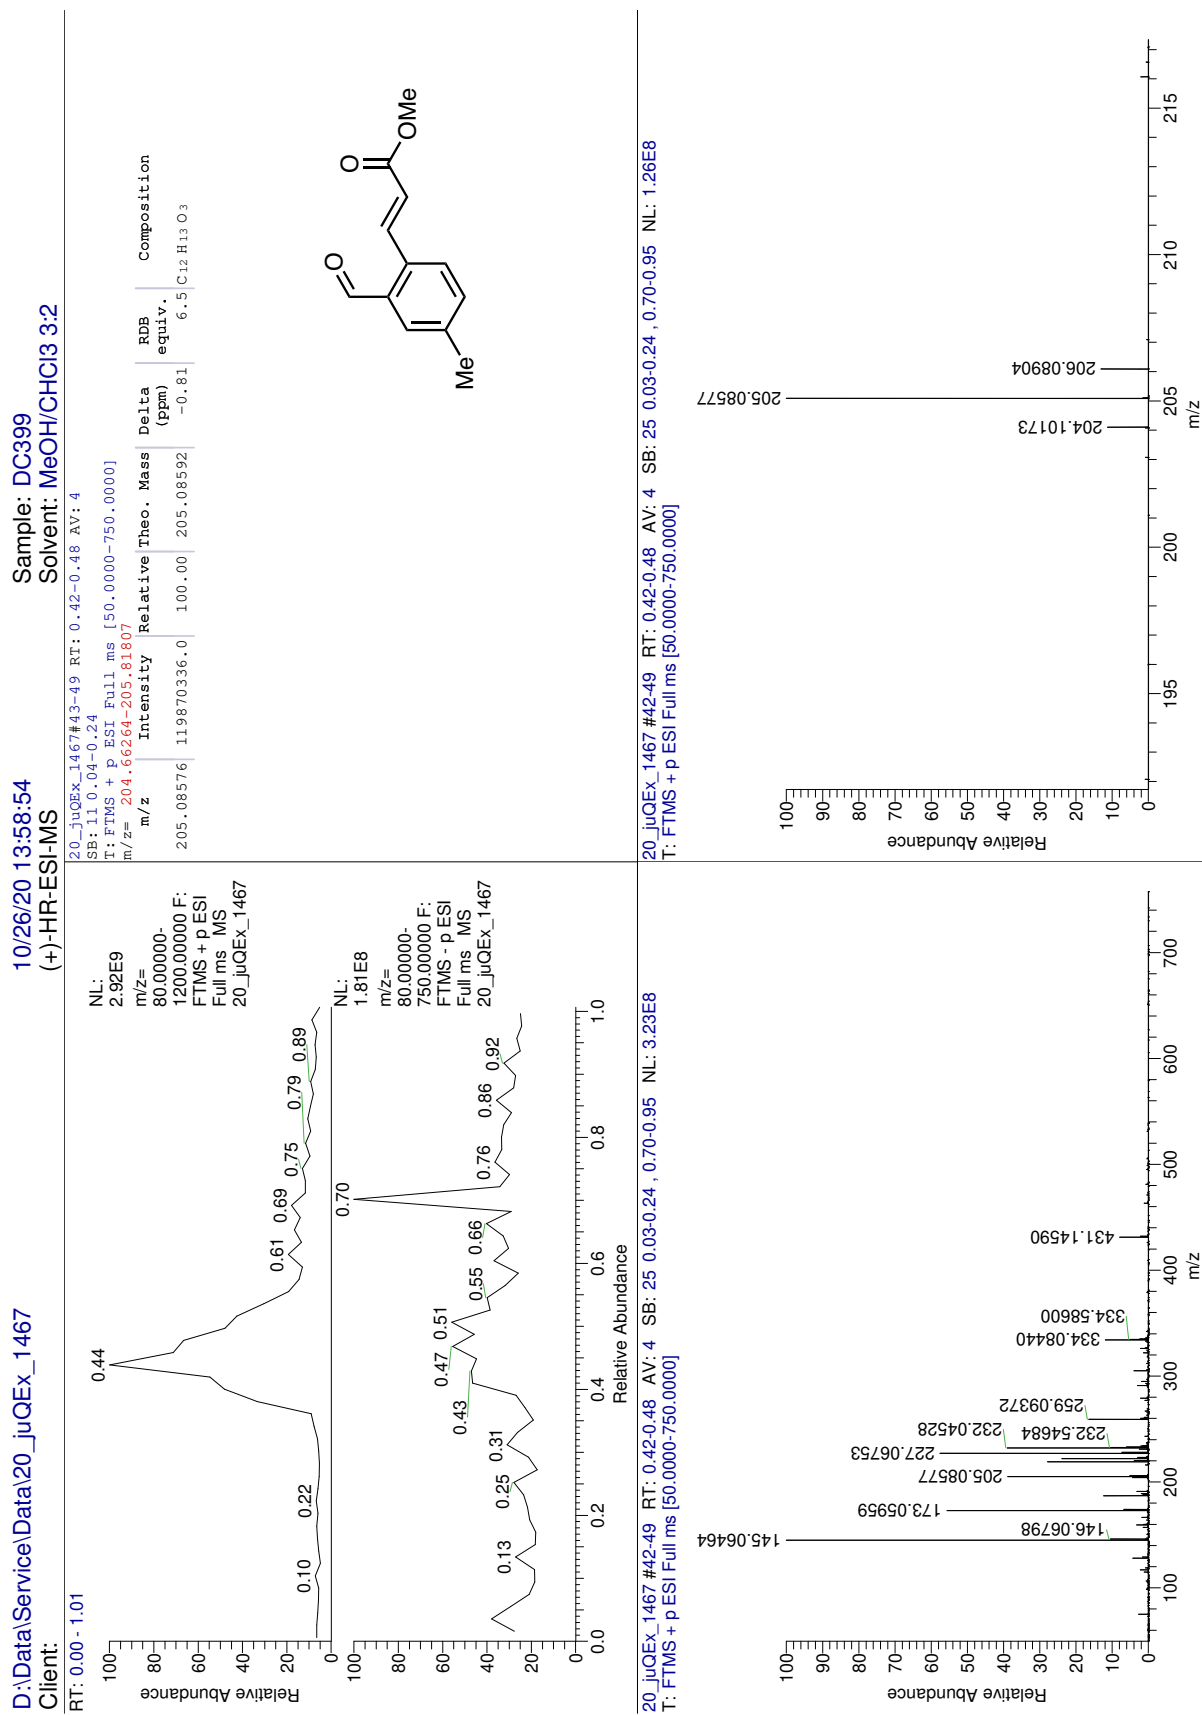

Figure S37: (+)-HR-ESI-MS of 7.

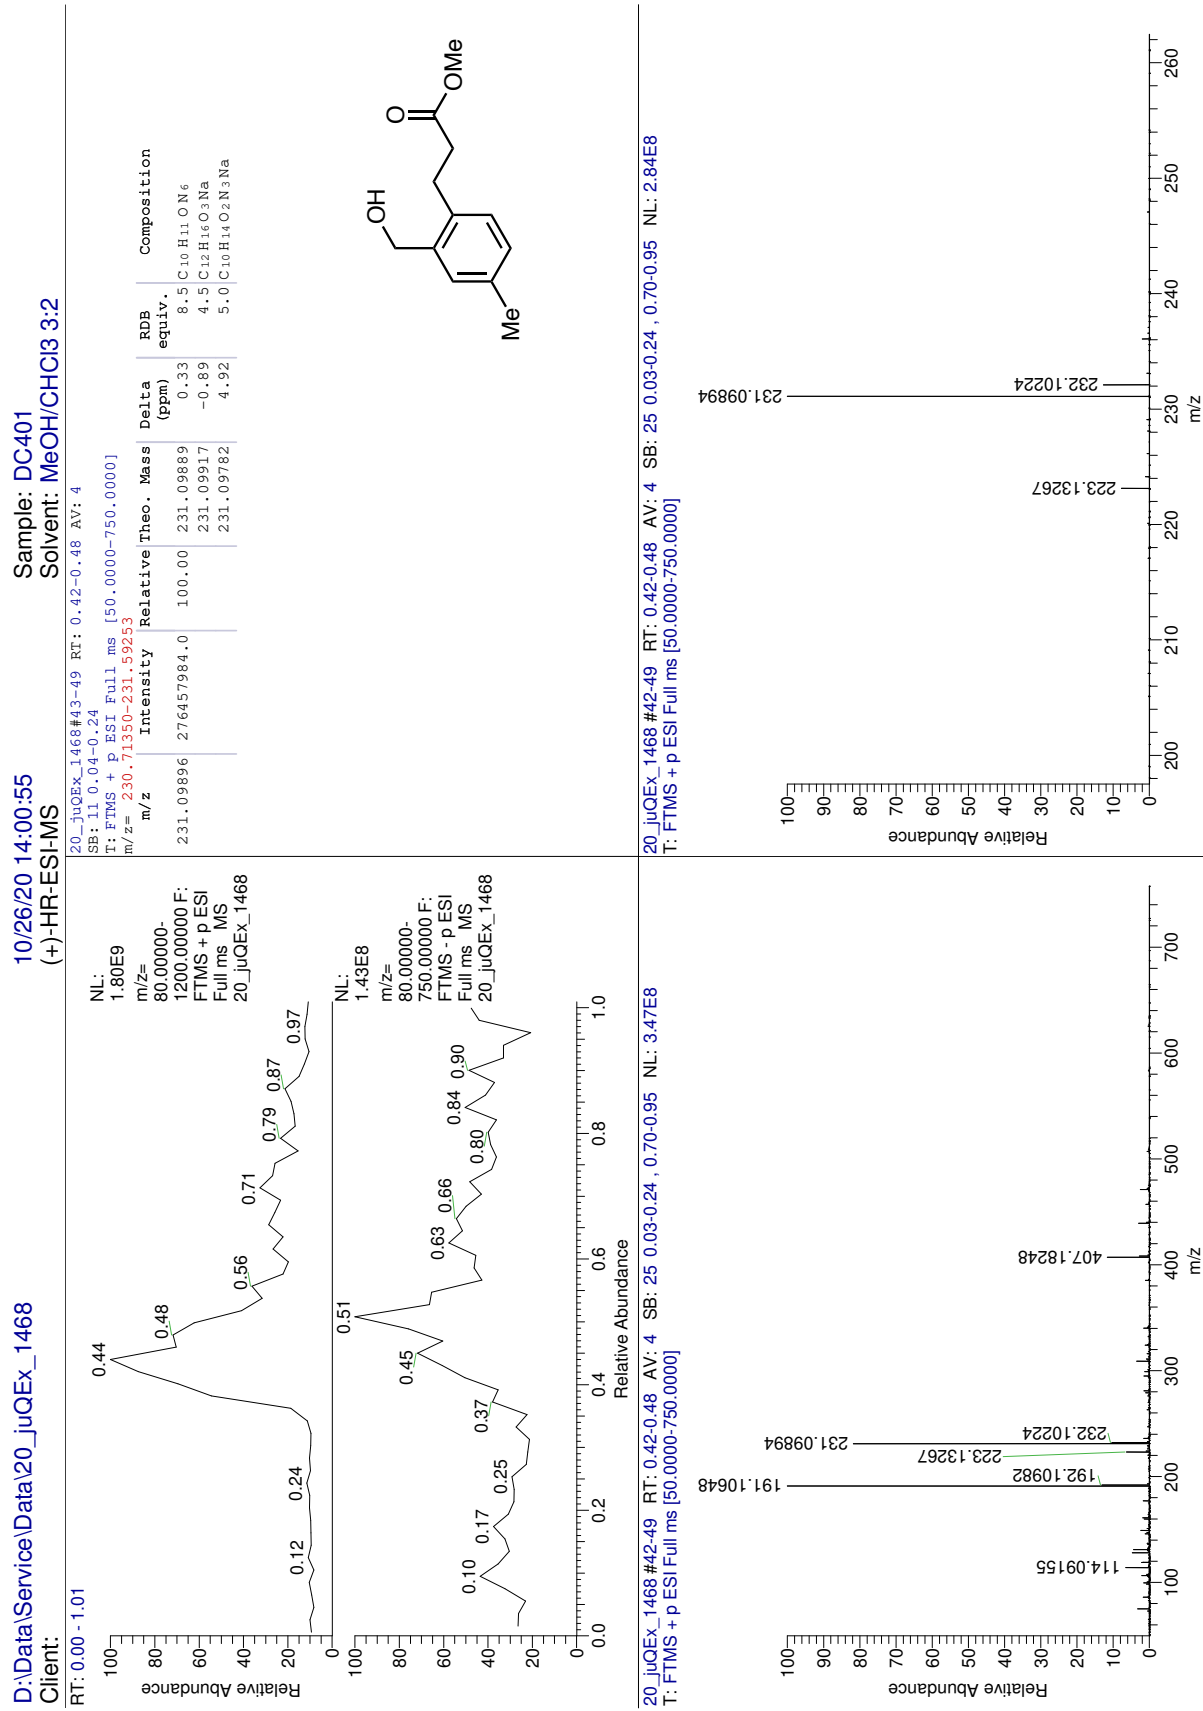

Figure S38: (+)-HR-ESI-MS of 8.

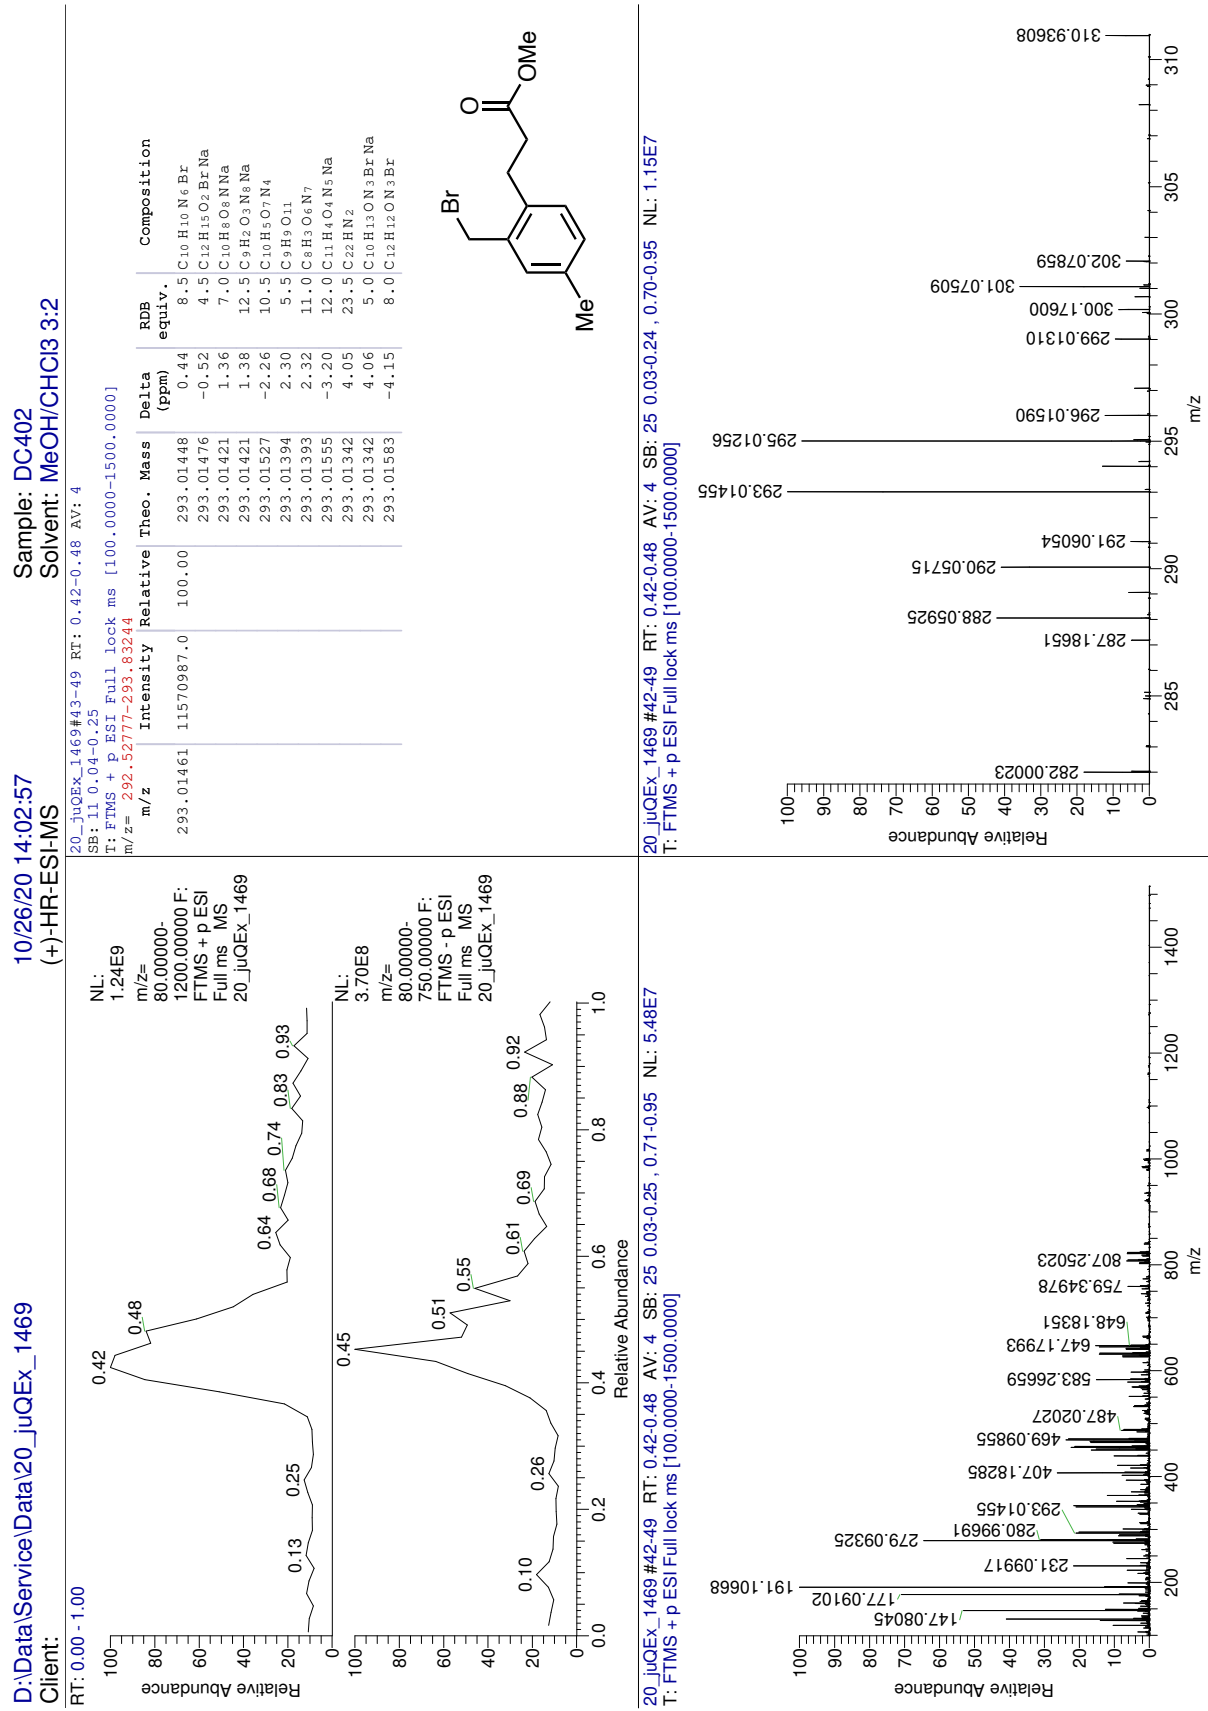



# HR-ESI Report

**Analysis Info**  
Acquisition Date: 10/28/2020 3:33:25 PM  
Analysis Name: D:\Data\UZH\_Data\Service\Data\20\_juhres\_0231.d  
Method: Service\_Syringe\_Pump\_Low\_Mass\_Range\_pos.m  
Sample Name: DC403  
Comment: Solvent: MeOH + NaI  
Client: Cavlovic  
Operator: Demo User  
Instrument: timsTOF Pro  
1854399.00195

**Acquisition Parameter**  
Source Type: ESI  
Focus: Active  
Scan Begin: 50 m/z  
Scan End: 2000 m/z  
Ion Polarity: Positive  
Set Nebulizer: 0.4 Bar  
Set Dry Heater: 180 °C  
Set Dry Gas: 4.0 l/min  
Set Divert Valve: Source  
Set Capillary: 2000 V  
Set End Plate Offset: -500 V

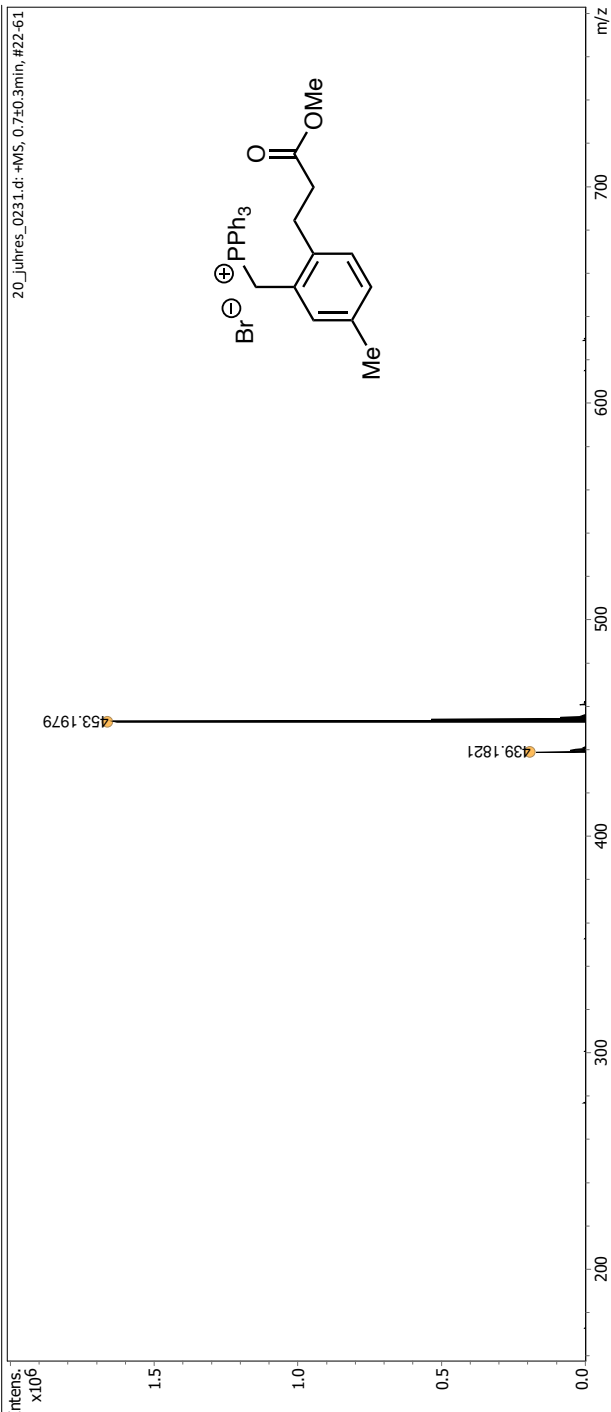

Figure S39: (+)-HR-ESI-MS of 2.

D:\Data\Service\Data\21\_juQEx\_1349  
Client: (+)-HR-ESI-MS

09/02/21 09:52:37  
(+)-HR-ESI-MS

Sample: DC610  
Solvent: MeOH/CHCl3 3:2

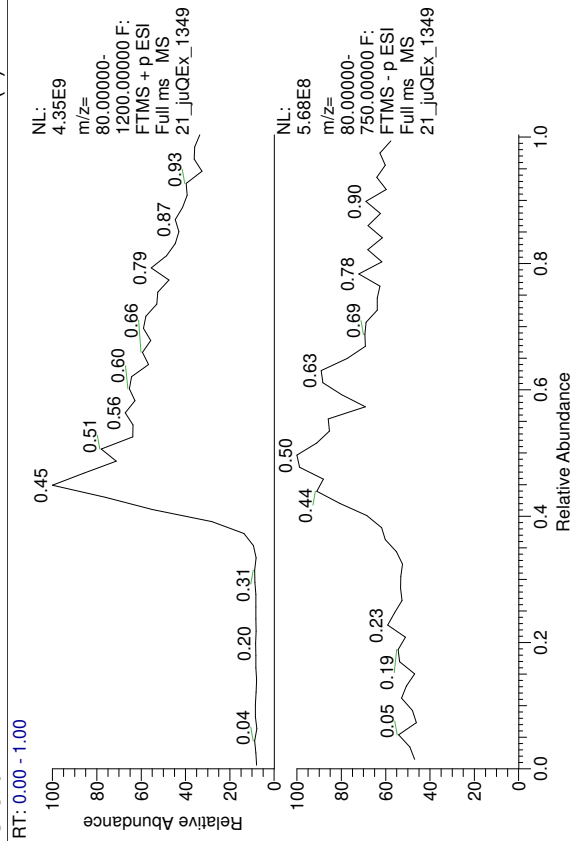

21\_juQEx\_1349#41-47 RT: 0.39-0.45 AV: 4  
SB: 25 0.03-0.24, 0.70-0.95  
T: FTMS + p ESI Full lock ms [100.0000-1500.0000]  
m/z = 582.97511-583.52607

| m/z       | Intensity  | Relative | Theo. Mass | Delta (ppm) | RDB equiv. | Composition  |
|-----------|------------|----------|------------|-------------|------------|--------------|
| 583.28415 | 30491620.0 | 100.00   | 583.28429  | -0.24       | 21.5       | C40H39O4     |
|           |            |          | 583.28478  | -1.09       | 20.0       | C24H29N19    |
|           |            |          | 583.28479  | -1.10       | 14.5       | C25H35O5N12  |
|           |            |          | 583.28346  | -1.11       | 9.0        | C26H41O10N5  |
|           |            |          | 583.28345  | 1.18        | 4.0        | C25H45O14N   |
|           |            |          | 583.28345  | 1.19        | 9.5        | C24H39O9N8   |
|           |            |          | 583.28530  | -1.97       | 15.0       | C23H33O4N15  |
|           |            |          | 583.28294  | 2.06        | 22.0       | C11H37O11N17 |
|           |            |          | 583.28562  | -2.53       | 26.5       | C41H35N4     |
|           |            |          | 583.28613  | -3.40       | 19.5       | C26H31ON16   |
|           |            |          | 583.28613  | -3.40       | 14.0       | C27H37O6N9   |
|           |            |          | 583.28614  | -3.41       | 8.5        | C28H43O11N2  |
|           |            |          | 583.28211  | 3.48        | 4.5        | C23H43O13N4  |
|           |            |          | 583.28211  | 3.49        | 10.0       | C22H37O8N11  |

21\_juQEx\_1349 #41-48 RT: 0.39-0.45 AV: 4 SB: 25 0.03-0.24, 0.70-0.95 NL: 1.01E8  
T: FTMS + p ESI Full lock ms [100.0000-1500.0000]

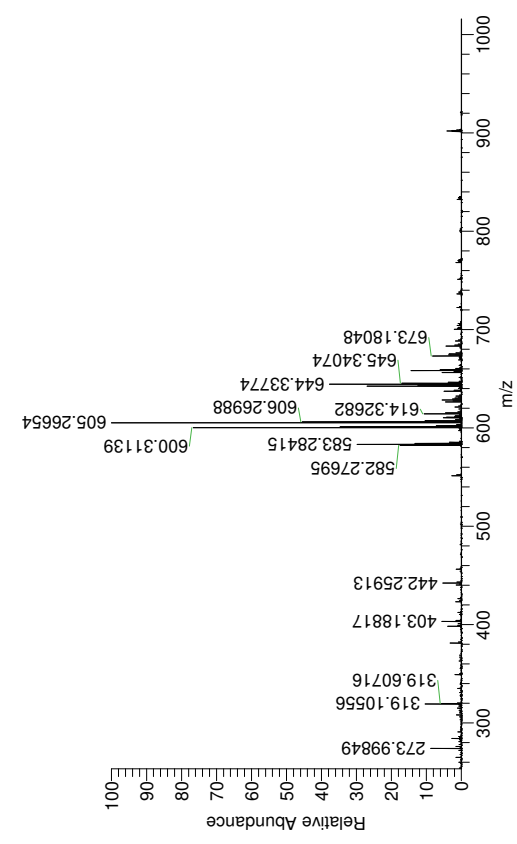

21\_juQEx\_1349 #41-47 RT: 0.39-0.45 AV: 4 SB: 25 0.03-0.24, 0.70-0.95 NL: 1.01E8  
T: FTMS + p ESI Full lock ms [100.0000-1500.0000]

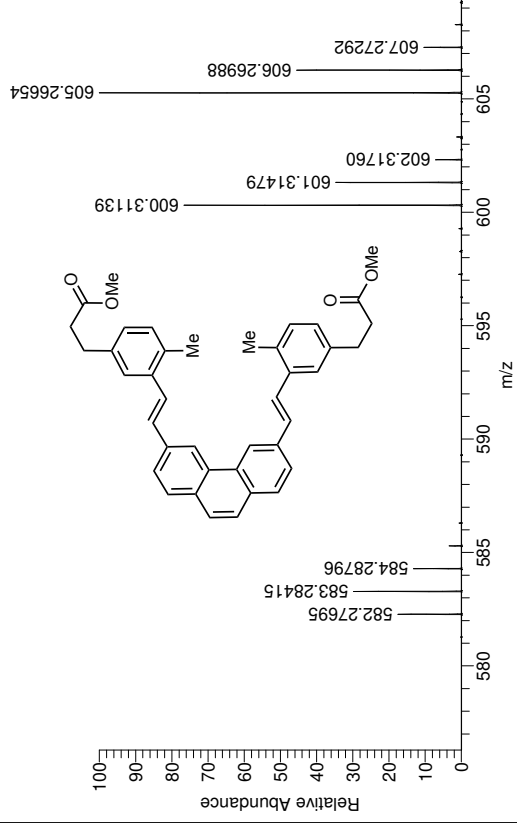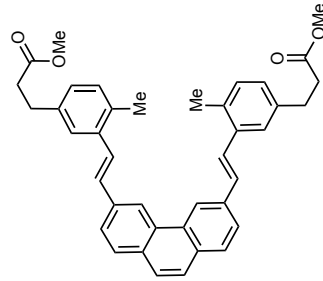

Figure S40: (+)-HR-ESI-MS of 4.

## Mass Spectrum SmartFormula Report

### Analysis Info

Analysis Name E:\new acq data for data analysis\PR249 002.d  
 Method hn Direct\_Infusion\_pos mode\_75-1700 mid 4eV.m  
 Sample Name Prince Ravat  
 Comment PR249. ca. 50 ug/ml MeCN

Acquisition Date 23.12.2016 14:56:50

Operator hn  
 Instrument / Ser# maXis 4G 21243

### Acquisition Parameter

|             |            |                      |          |                            |           |
|-------------|------------|----------------------|----------|----------------------------|-----------|
| Source Type | ESI        | Ion Polarity         | Positive | Set Nebulizer              | 0.4 Bar   |
| Focus       | Not active | Set Capillary        | 3600 V   | Set Dry Heater             | 180 °C    |
| Scan Begin  | 75 m/z     | Set End Plate Offset | -500 V   | Set Dry Gas                | 4.0 l/min |
| Scan End    | 1700 m/z   | Collision Energy     | 8.0 eV   | Set Ion Energy ( MS only ) | 4.0 eV    |

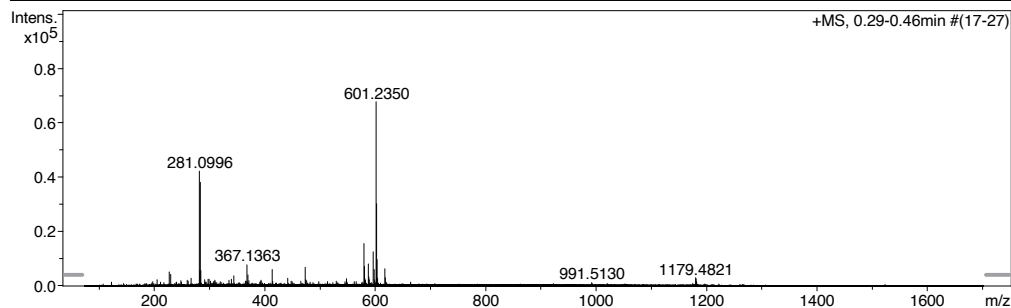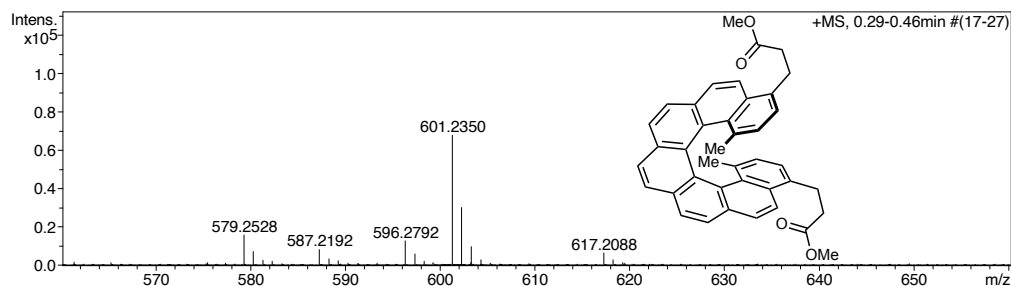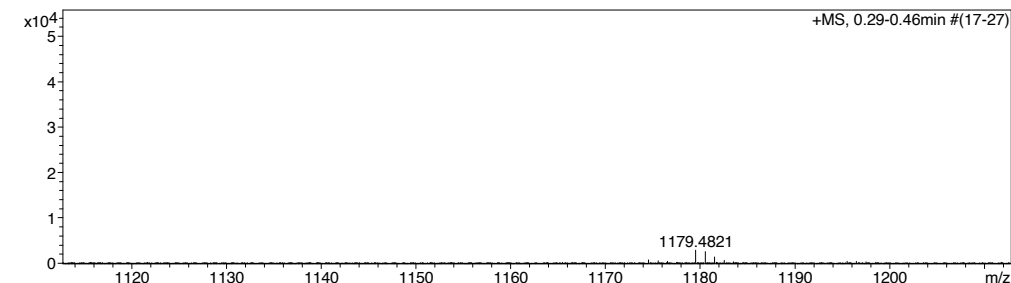

| Meas. m/z | # | Formula          | Score  | m/z       | err [mDa] | err [ppm] | mSigma | rdb  | e <sup>-</sup> | Conf | z  |
|-----------|---|------------------|--------|-----------|-----------|-----------|--------|------|----------------|------|----|
| 579.2528  | 1 | C 40 H 35 O 4    | 100.00 | 579.2530  | 0.2       | 0.3       | 61.4   | 23.5 | even           |      | 1+ |
| 596.2792  | 1 | C 40 H 38 N O 4  | 100.00 | 596.2795  | 0.3       | 0.6       | 40.9   | 22.5 | even           |      |    |
| 601.2350  | 1 | C 40 H 34 Na O 4 | 100.00 | 601.2349  | -0.1      | -0.1      | 23.6   | 23.5 | even           |      |    |
| 617.2088  | 1 | C 40 H 34 K O 4  | 100.00 | 617.2089  | 0.1       | 0.1       | 18.8   | 23.5 | even           |      |    |
| 1179.4821 | 1 | C 80 H 68 Na O 8 | 100.00 | 1179.4806 | -1.4      | -1.2      | 66.5   | 46.5 | even           |      |    |

**Figure S41:** (+)-HR-ESI-MS of **9**.

## Mass Spectrum SmartFormula Report

### Analysis Info

Analysis Name E:\new acq data for data analysis\PR250 001.d  
 Method hn Direct\_Infusion\_pos mode\_75-1700 mid 4eV.m  
 Sample Name Prince Ravat  
 Comment PR250. ca. 50 ug/ml MeCN

Acquisition Date 23.12.2016 13:27:11

Operator hn  
 Instrument / Ser# maXis 4G 21243

### Acquisition Parameter

|             |            |                      |          |                            |           |
|-------------|------------|----------------------|----------|----------------------------|-----------|
| Source Type | ESI        | Ion Polarity         | Positive | Set Nebulizer              | 0.4 Bar   |
| Focus       | Not active | Set Capillary        | 3600 V   | Set Dry Heater             | 180 °C    |
| Scan Begin  | 75 m/z     | Set End Plate Offset | -500 V   | Set Dry Gas                | 4.0 l/min |
| Scan End    | 1700 m/z   | Collision Energy     | 8.0 eV   | Set Ion Energy ( MS only ) | 4.0 eV    |

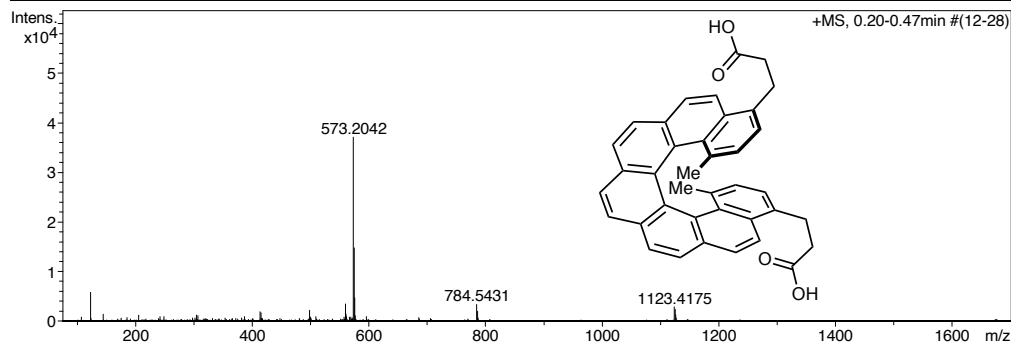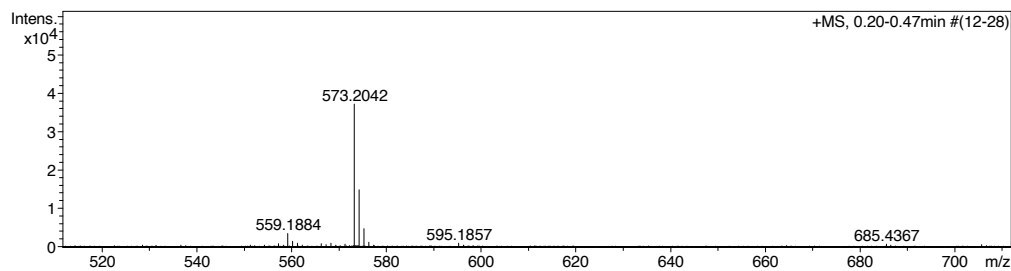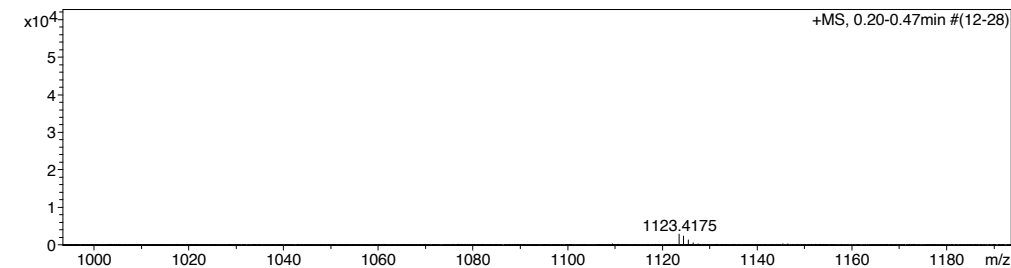

| Meas. m/z | # | Formula            | Score  | m/z       | err [mDa] | err [ppm] | mSigma | rdb  | e <sup>-</sup> Conf | z  |
|-----------|---|--------------------|--------|-----------|-----------|-----------|--------|------|---------------------|----|
| 573.2042  | 1 | C 38 H 30 Na O 4   | 100.00 | 573.2036  | -0.6      | -1.1      | 20.6   | 23.5 | even                | 1+ |
| 595.1857  | 1 | C 38 H 29 Na 2 O 4 | 100.00 | 595.1856  | -0.1      | -0.2      | 55.0   | 23.5 | even                |    |
| 1123.4175 | 1 | C 76 H 60 Na O 8   | 100.00 | 1123.4180 | 0.6       | 0.5       | 64.5   | 46.5 | even                |    |

Figure S42: (+)-HR-ESI-MS of 10.

## Mass Spectrum SmartFormula Report

### Analysis Info

Analysis Name E:\new acq data for data analysis\PR251 002.d  
 Method hn Direct\_Infusion\_pos mode\_75-2000 higher 4eV.m  
 Sample Name Prince Ravat  
 Comment PR251, ca. 50 ug /ml MeCN, with MeCN/TFA

Acquisition Date 03.01.2017 17:27:40

Operator hn  
 Instrument / Ser# maXis 4G 21243

### Acquisition Parameter

|             |            |                      |          |                            |           |
|-------------|------------|----------------------|----------|----------------------------|-----------|
| Source Type | ESI        | Ion Polarity         | Positive | Set Nebulizer              | 0.4 Bar   |
| Focus       | Not active | Set Capillary        | 3600 V   | Set Dry Heater             | 180 °C    |
| Scan Begin  | 75 m/z     | Set End Plate Offset | -500 V   | Set Dry Gas                | 4.0 l/min |
| Scan End    | 2000 m/z   | Collision Energy     | 8.0 eV   | Set Ion Energy ( MS only ) | 4.0 eV    |

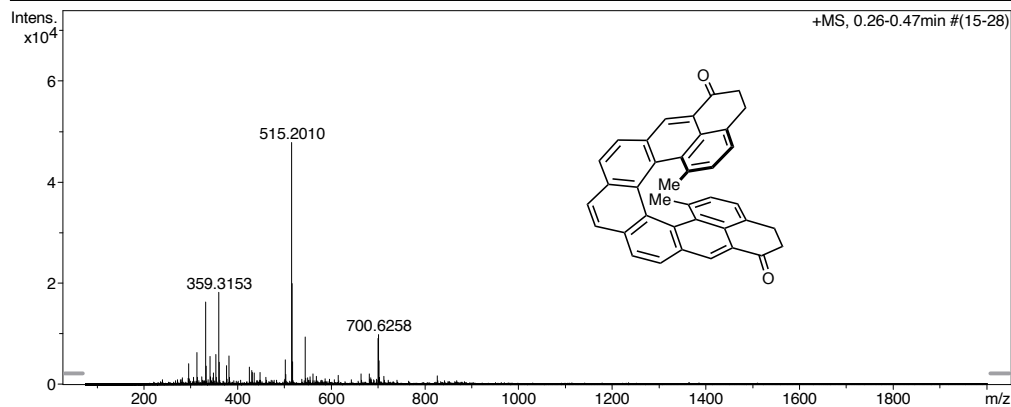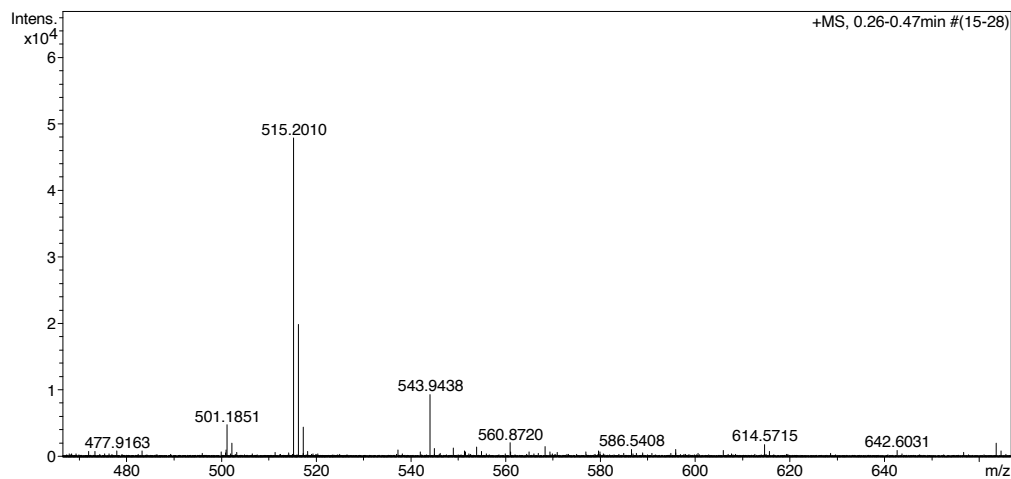

| Meas. m/z | # | Formula                                        | Score  | m/z      | err [mDa] | err [ppm] | mSigma | rdb  | e <sup>-</sup> | Conf | z  |
|-----------|---|------------------------------------------------|--------|----------|-----------|-----------|--------|------|----------------|------|----|
| 515.2010  | 1 | C <sub>38</sub> H <sub>27</sub> O <sub>2</sub> | 100.00 | 515.2006 | -0.5      | -0.9      | 3.5    | 25.5 | even           |      | 1+ |

**Figure S43:** (+)-HR-ESI-MS of **5**.

## Mass Spectrum SmartFormula Report

### Analysis Info

Analysis Name E:\new acq data for data analysis\PR252 001.d  
 Method hn Direct\_Infusion\_pos mode\_75-2000 higher 4eV.m  
 Sample Name Prince Ravat  
 Comment PR252, ca. 50 ug /ml MeCN

Acquisition Date 03.01.2017 17:52:29

Operator hn  
 Instrument / Ser# maXis 4G 21243

### Acquisition Parameter

|             |            |                      |          |                            |           |
|-------------|------------|----------------------|----------|----------------------------|-----------|
| Source Type | ESI        | Ion Polarity         | Positive | Set Nebulizer              | 0.4 Bar   |
| Focus       | Not active | Set Capillary        | 3600 V   | Set Dry Heater             | 180 °C    |
| Scan Begin  | 75 m/z     | Set End Plate Offset | -500 V   | Set Dry Gas                | 4.0 l/min |
| Scan End    | 2000 m/z   | Collision Energy     | 88.0 eV  | Set Ion Energy ( MS only ) | 4.0 eV    |

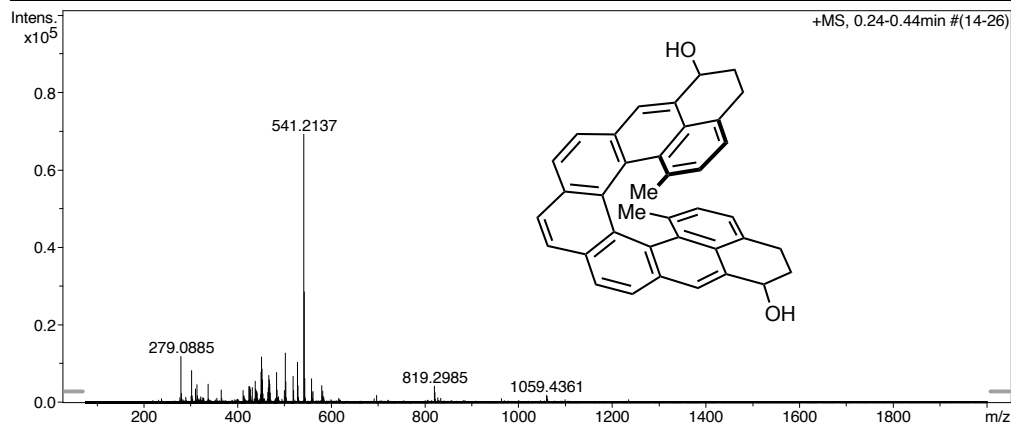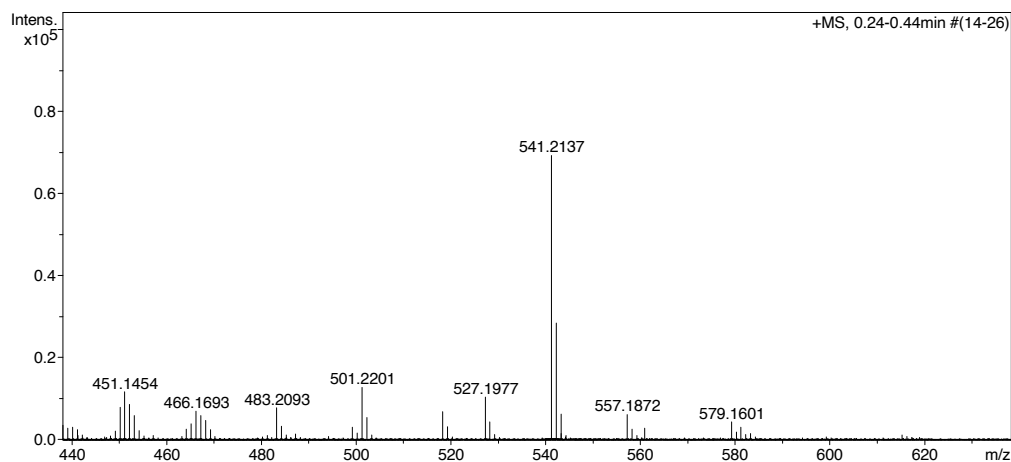

| Meas. m/z | # | Formula          | Score  | m/z      | err [mDa] | err [ppm] | mSigma | rdb  | e <sup>-</sup> Conf | z  |
|-----------|---|------------------|--------|----------|-----------|-----------|--------|------|---------------------|----|
| 541.2137  | 1 | C 38 H 30 Na O 2 | 100.00 | 541.2138 | 0.1       | 0.1       | 1.3    | 23.5 | even                | 1+ |
| 557.1872  | 1 | C 38 H 30 K O 2  | 100.00 | 557.1877 | 0.5       | 0.9       | 8.1    | 23.5 | even                |    |

**Figure S44:** (+)-HR-ESI-MS of 11.

## HR-ESI Report

**Analysis Info**  
Analysis Name D:\Data\UZH\_Data\Data\_2023\Service\Data\23\_juhres\_0214.d  
Method Service\_Syringe\_Pump\_High\_Mass\_Range\_pos.m  
Sample Name 663  
Comment Sheath liquid: MeOH / DCM + 0.1% FA  
Client: Caviovic

Acquisition Date 5/4/2023 3:58:14 PM  
Operator Demo User  
Instrument timsTOF Pro 1854399.00195

**Acquisition Parameter**

|             |            |                      |          |                  |           |
|-------------|------------|----------------------|----------|------------------|-----------|
| Source Type | APCI       | Ion Polarity         | Positive | Set Nebulizer    | 5.0 Bar   |
| Focus       | Not active | Set Capillary        | 4500 V   | Set Dry Heater   | 220 °C    |
| Scan Begin  | 50 m/z     | Set End Plate Offset | -500 V   | Set Dry Gas      | 5.0 l/min |
| Scan End    | 3000 m/z   |                      |          | Set Divert Valve | Source    |

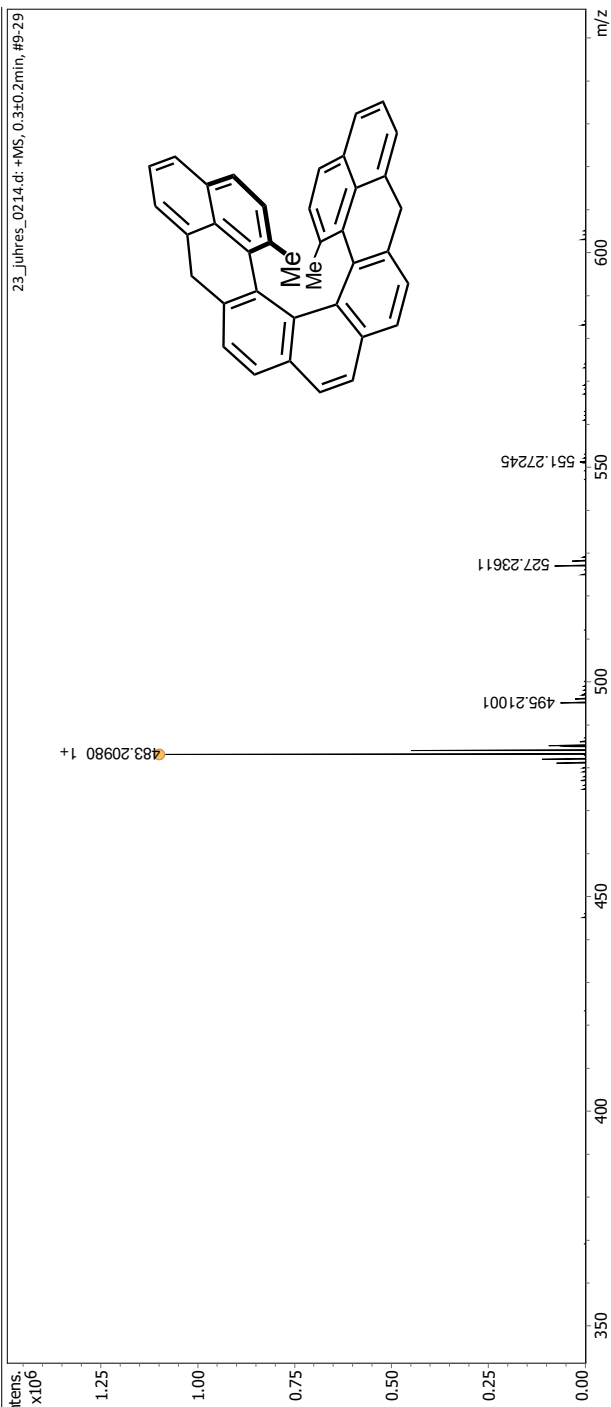

Bruker Compass DataAnalysis 5.3

printed: 5/4/2023 4:08:15 PM

by: demo

1 of 2

Figure S45: (+)-HR-ESI-MS of 2H-DMNC.

D:\Data\Service\Data\20\_juQEx\_1588  
 Sample: DC501  
 T: juQEx\_1588 #14-76 RT: 0.10-0.53 AV: 63 NL: 4.44E7  
 T: FTMS + p APCI corona Full lock ms [150.0000-2000.0000]

(+) HR-APCI-MS 11/06/20 13:12:12  
 Comment: Solvent: DCM, Sheath liquid: MeOH + 0.1% FA Client: Cavlovic

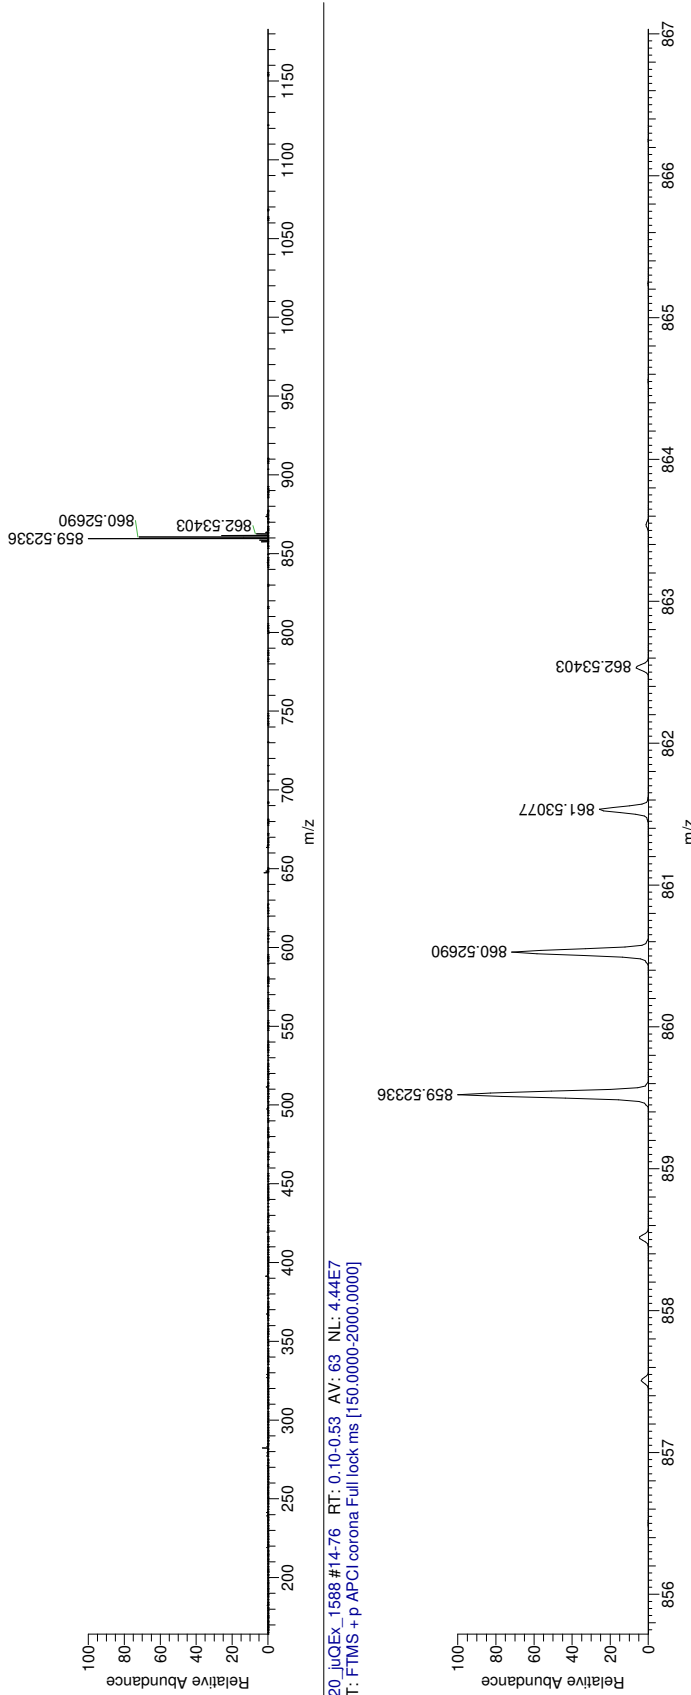

20\_juQEx\_1588 #14-76 RT: 0.10-0.53 AV: 63

T: FTMS + p APCI corona Full lock ms [150.0000-2000.0000]

m/z= 859.39566-859.64602

| m/z       | Intensity  | Relative | Theo. Mass | Delta (ppm) | RDB equiv. | Composition                     |
|-----------|------------|----------|------------|-------------|------------|---------------------------------|
| 859.52336 | 44485500.0 | 100.00   | 859.52373  | -0.43       | 33.5       | C <sub>66</sub> H <sub>67</sub> |

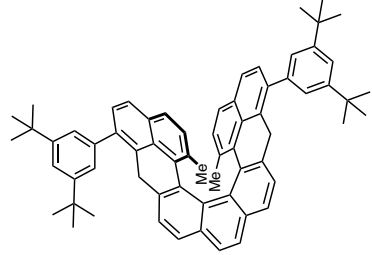

Figure S46: (+)-HR-APCI-MS of 2H-DMNC-Ar.



D:\Data\Service\Data\22\_juQEx\_1846 02/09/22 10:29:18  
 Sample: DC625-ccF1 (+)-HR-APCI-MS Solvent: DCM, Sheath liquid: MeOH/DCM 1:1 + 0.1% FA

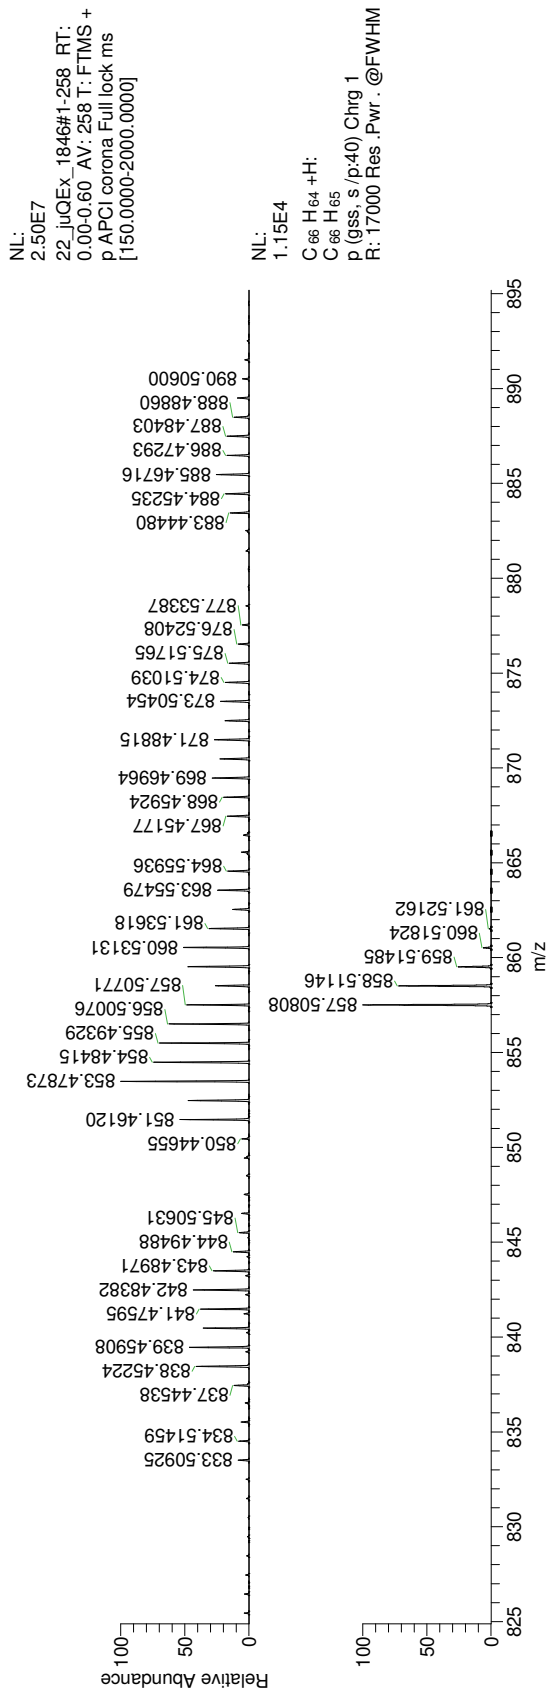

22\_juQEx\_1846#1-258 RT: 0.00-0.60 AV: 258  
 T: FTMS + p APCI corona Full lock ms [150.0000-2000.0000]  
 m/z = 852.88503-857.93754

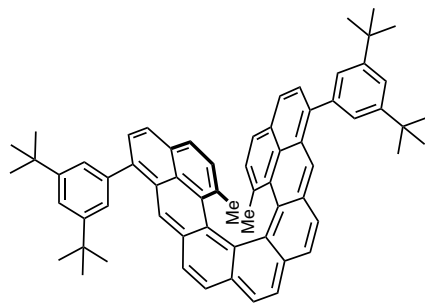

| m/z       | Intensity  | Relative | Theo. Mass | Delta (ppm) | RDB equiv. | Composition                     |
|-----------|------------|----------|------------|-------------|------------|---------------------------------|
| 853.47873 | 25200868.0 | 100.00   | 853.47678  | 2.29        | 36.5       | C <sub>66</sub> H <sub>61</sub> |
| 854.48415 | 18821584.0 | 74.69    | 854.48460  | -0.53       | 36.0       | C <sub>66</sub> H <sub>62</sub> |
| 855.49329 | 17540720.0 | 69.60    | 855.49243  | 1.01        | 35.5       | C <sub>66</sub> H <sub>63</sub> |
| 856.50076 | 15929071.0 | 63.21    | 856.50025  | 0.59        | 35.0       | C <sub>66</sub> H <sub>64</sub> |
| 857.50771 | 12330738.0 | 48.93    | 857.50808  | -0.43       | 34.5       | C <sub>66</sub> H <sub>65</sub> |

Figure S47: (+)-HR-APCI-MS of DMNC-Ar.

## EPR Spectroscopy

The EPR spectra (Fig. S47) were recorded in a nitrogen-saturated benzene solution (left), as a solid powder (middle), or in a solid matrix (right) on an X-band bench-top EPR spectrometer (9.48 GHz) using the following instrumental parameters: magnetic field 336–341 mT, scan time 1800 s, modulation amplitude 0.2 mT, microwave power 10 mW. The raw EPR data is available free of charge on a public repository Zenodo (DOI:10.5281/zenodo.7733689).

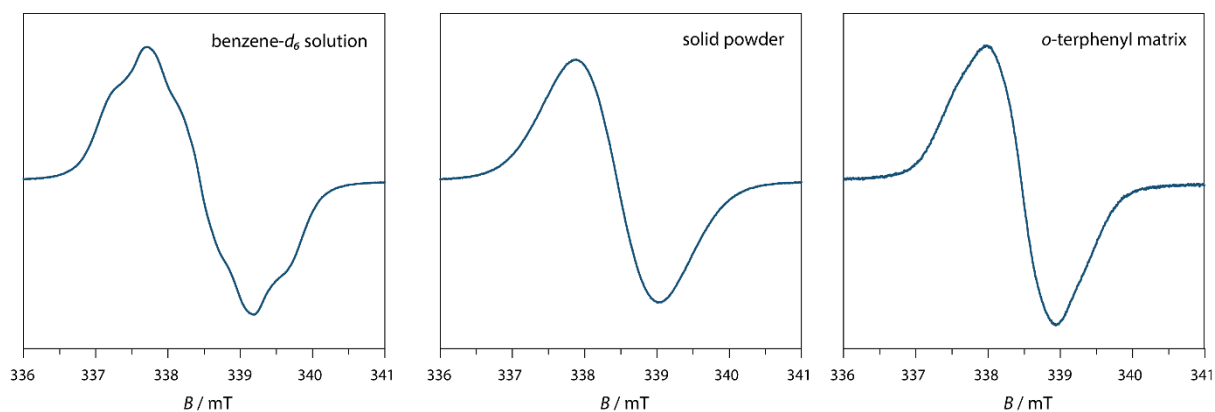

**Figure S48:** EPR spectra of DMNC-Ar in 8.7 mM benzene- $d_6$  solution (left), as a solid powder (middle), and in an  $o$ -terphenyl matrix (right).

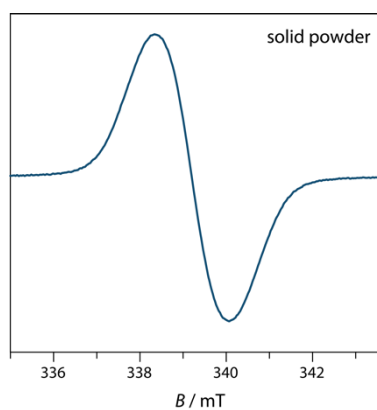

**Figure S49:** EPR spectrum of insoluble solid from attempted preparation of DMNC. Radical impurities cannot be excluded.

Variable-temperature EPR measurements on **DMNC-Ar** at X-band (9.38 GHz) were carried out using a Bruker ELEXSYS E580 CW EPR spectrometer equipped with an Oxford Instruments helium cryostat (ESR900) and a MercuryTC temperature controller.

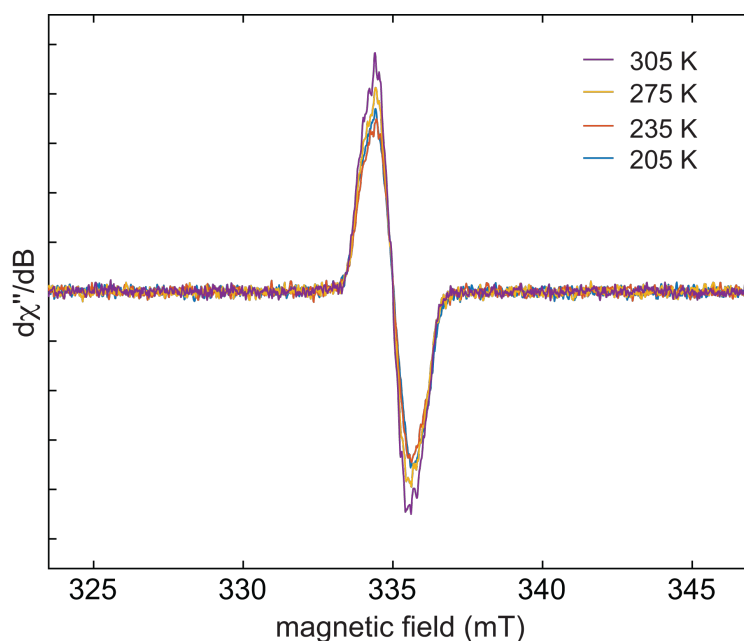

**Figure S50:** EPR spectra of **DMNC-Ar** in toluene solution at different temperatures. The signal is centered at  $g = 2.0026$  and has a peak-to-peak linewidth ( $DB_{pp}$ ) of 1.2 mT.

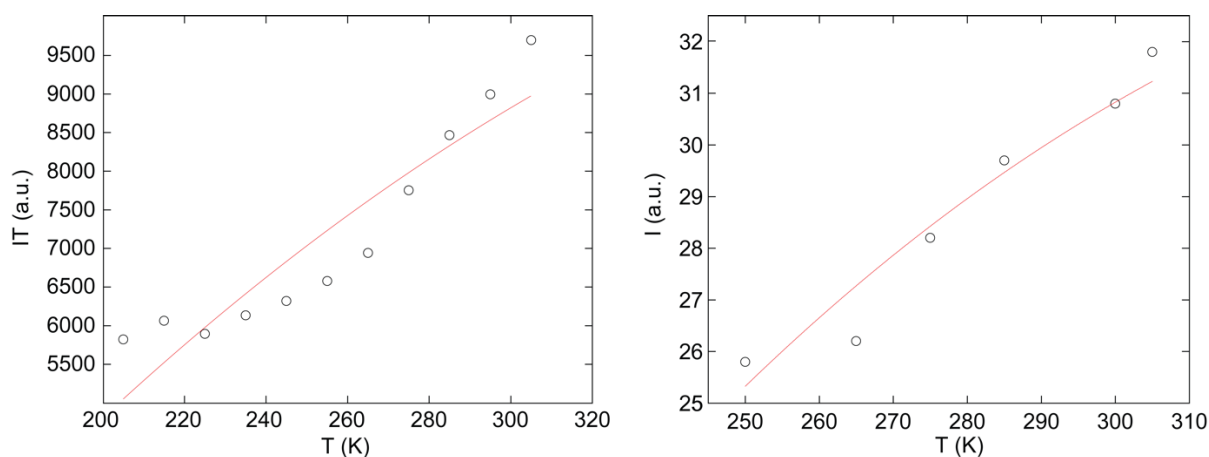

**Figure S51:** Temperature dependence of the double integral EPR intensity ( $I$  or  $IT$ ) of **DMNC-Ar** in toluene solution of all measured data points (left) and of all points above 230 K (right). Circles ( $\bigcirc$ ) represent the experimental data points and the red lines corresponds to the fit with the Bleaney–Bowers equation.

Fitting of the double-integral intensity of the signal against temperature using the Bleaney–Bowers equation gives a singlet–triplet gap of  $\Delta E_{ST} = 4.16 \text{ kJ mol}^{-1}$  ( $0.994 \text{ kcal mol}^{-1}$ ) when all data points are included and a singlet–triplet gap of  $\Delta E_{ST} = 5.82 \text{ kJ mol}^{-1}$  ( $1.39 \text{ kcal mol}^{-1}$ ) when only points above 230 K are considered, both suggesting a singlet ground state. At temperatures below 230 K, a plateau of the signal intensity was observed, which is likely caused by the presence of monoradical impurities whose signal starts to dominate at lower temperatures.

## UV-vis-NIR Spectroscopy

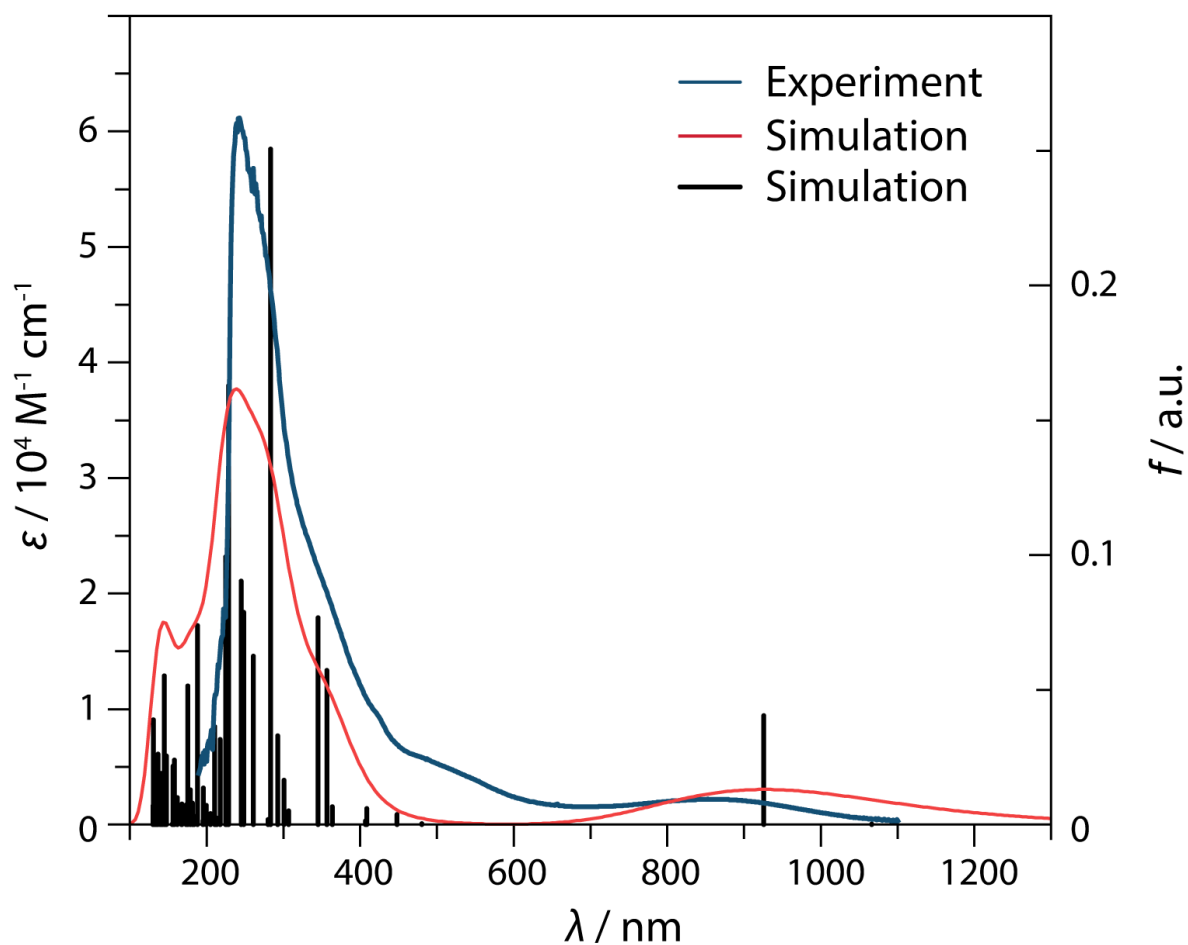

**Figure S52:** Comparison of the experimental UV-vis-NIR absorption spectrum of **DMNC-Ar** (blue line) in  $\text{CH}_2\text{Cl}_2$  with the spectrum simulated by TD-DFT calculations (red line and black vertical lines; B3LYP/6-31G(d,p)( $\text{CH}_2\text{Cl}_2$ )). The calculated spectra are shifted by 0.21 eV.  $f$  = oscillator strength.

The raw UV-vis data (experimental and calculated) is available free of charge on a public repository Zenodo (DOI:10.5281/zenodo.7733689).

## X-Ray Crystallography

Single-crystal X-ray diffraction data were collected at 160(1) K on a Rigaku OD SuperNova/Atlas area-detector diffractometer using Cu K $\alpha$  radiation ( $\lambda = 1.54184 \text{ \AA}$ ) from a micro-focus X-ray source and an Oxford Instruments Cryojet XL cooler. The selected suitable single crystals were mounted using polybutene oil on a flexible loop fixed on a goniometer head and immediately transferred to the diffractometer. Pre-experiments, data collections, data reductions and analytical absorption corrections<sup>4</sup> were performed with the program suite *CrysAlisPro*.<sup>5</sup> Using *Olex2*,<sup>6</sup> the structure was solved with the *SHELXT*<sup>7</sup> small-molecule structure solution program and refined with the *SHELXL2018/3* program package<sup>8</sup> by full-matrix least-squares minimization on  $F^2$ . *PLATON*<sup>9</sup> was used to check the results of the X-ray analyses. For more details about the data collection and refinement parameters, see the CIF file.

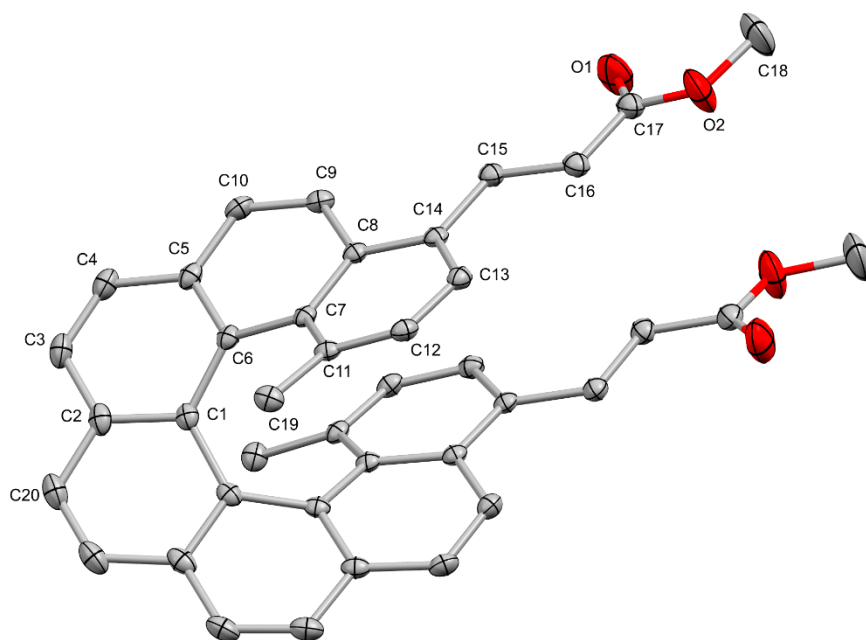

**Figure S53:** Solid-state structure of **9**. Hydrogen atoms are omitted for clarity.

Yellow crystals were obtained by slow evaporation from  $\text{CHCl}_3$  at 25 °C for the SC-XRD measurement.

### Special features

The molecule lies on a two-fold axis.

**Table S1:** Crystal data and structure refinement for **9**.

| Identification code                                          | <b>9</b> (CCDC Number: 2233868)                                              |
|--------------------------------------------------------------|------------------------------------------------------------------------------|
| Empirical formula                                            | C <sub>41</sub> H <sub>36</sub> Cl <sub>2</sub> O <sub>4</sub>               |
| Formula weight                                               | 663.60                                                                       |
| Temperature / K                                              | 160(1)                                                                       |
| Crystal system                                               | monoclinic                                                                   |
| Space group                                                  | <i>I</i> 2/ <i>a</i>                                                         |
| <i>a</i> / Å                                                 | 8.02420(10)                                                                  |
| <i>b</i> / Å                                                 | 30.1775(4)                                                                   |
| <i>c</i> / Å                                                 | 13.9999(2)                                                                   |
| $\alpha$ / °                                                 | 90                                                                           |
| $\beta$ / °                                                  | 105.072(2)                                                                   |
| $\gamma$ / °                                                 | 90                                                                           |
| Volume / Å <sup>3</sup>                                      | 3273.46(8)                                                                   |
| <i>Z</i>                                                     | 4                                                                            |
| $\rho_{\text{calc}}$ / g/cm <sup>3</sup>                     | 1.346                                                                        |
| $\mu$ / mm <sup>-1</sup>                                     | 2.127                                                                        |
| <i>F</i> (000)                                               | 1392.0                                                                       |
| Crystal size / mm <sup>3</sup>                               | 0.25 × 0.2 × 0.11                                                            |
| Radiation                                                    | Cu K $\alpha$ ( $\lambda$ = 1.54184)                                         |
| 2 $\Theta$ range for data collection / °                     | 5.858 to 148.892                                                             |
| Index ranges                                                 | -10 ≤ <i>h</i> ≤ 10, -37 ≤ <i>k</i> ≤ 36, -16 ≤ <i>l</i> ≤ 17                |
| Reflections collected                                        | 16896                                                                        |
| Independent reflections                                      | 3346 [ <i>R</i> <sub>int</sub> = 0.0167, <i>R</i> <sub>sigma</sub> = 0.0099] |
| Data/restraints/parameters                                   | 3346/13/228                                                                  |
| Goodness-of-fit on <i>F</i> <sup>2</sup>                     | 1.078                                                                        |
| Final <i>R</i> indexes [ <i>I</i> ≥ 2 $\sigma$ ( <i>I</i> )] | <i>R</i> <sub>1</sub> = 0.0651, <i>wR</i> <sub>2</sub> = 0.1836              |
| Final <i>R</i> indexes [all data]                            | <i>R</i> <sub>1</sub> = 0.0669, <i>wR</i> <sub>2</sub> = 0.1853              |
| Largest diff. peak/hole / e Å <sup>-3</sup>                  | 1.12/-0.79                                                                   |

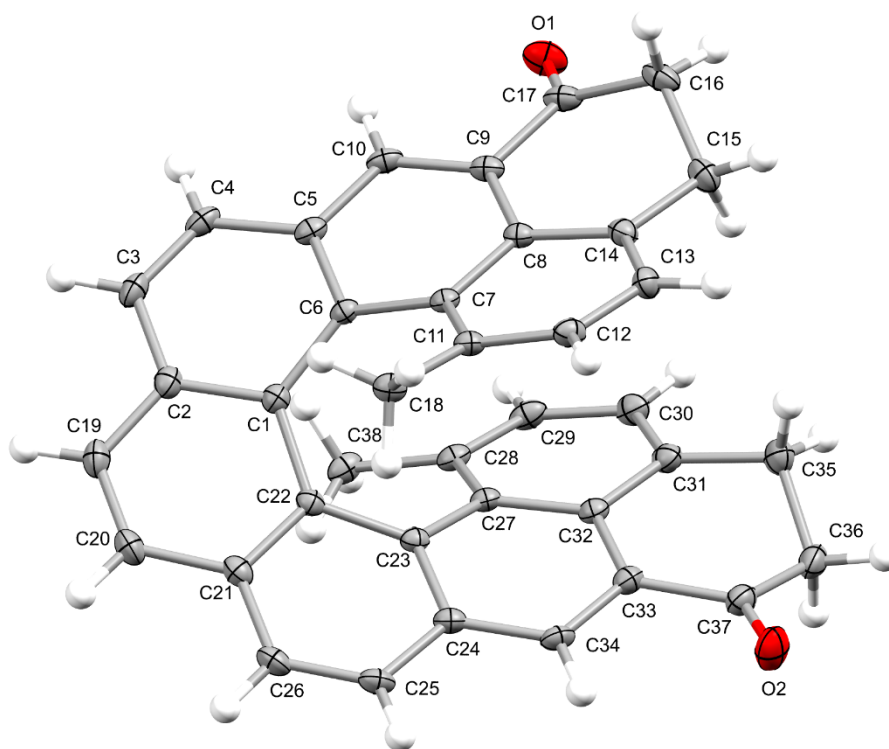

**Figure S54:** Solid-state structure of **5**.

Yellow crystals were obtained by slow evaporation from  $\text{CHCl}_3$  at 25 °C for the SC-XRD measurement.

**Table S2:** Crystal data and structure refinement for **5**.

| Identification code                                          | <b>5</b> (CCDC Number: 2233869)                                              |
|--------------------------------------------------------------|------------------------------------------------------------------------------|
| Empirical formula                                            | C <sub>38</sub> H <sub>26</sub> O <sub>2</sub>                               |
| Formula weight                                               | 514.59                                                                       |
| Temperature / K                                              | 160(1)                                                                       |
| Crystal system                                               | triclinic                                                                    |
| Space group                                                  | <i>P</i> -1                                                                  |
| <i>a</i> / Å                                                 | 8.1425(3)                                                                    |
| <i>b</i> / Å                                                 | 12.3731(4)                                                                   |
| <i>c</i> / Å                                                 | 13.4276(5)                                                                   |
| $\alpha$ / °                                                 | 71.820(3)                                                                    |
| $\beta$ / °                                                  | 73.113(3)                                                                    |
| $\gamma$ / °                                                 | 74.791(3)                                                                    |
| Volume / Å <sup>3</sup>                                      | 1207.72(8)                                                                   |
| <i>Z</i>                                                     | 2                                                                            |
| $\rho_{\text{calc}}$ / g/cm <sup>3</sup>                     | 1.415                                                                        |
| $\mu$ / mm <sup>-1</sup>                                     | 0.669                                                                        |
| <i>F</i> (000)                                               | 540.0                                                                        |
| Crystal size / mm <sup>3</sup>                               | 0.21 × 0.1 × 0.06                                                            |
| Radiation                                                    | Cu K $\alpha$ ( $\lambda$ = 1.54184)                                         |
| 2 $\Theta$ range for data collection / °                     | 7.116 to 148.986                                                             |
| Index ranges                                                 | -10 ≤ <i>h</i> ≤ 10, -15 ≤ <i>k</i> ≤ 14, -16 ≤ <i>l</i> ≤ 16                |
| Reflections collected                                        | 23349                                                                        |
| Independent reflections                                      | 4924 [ <i>R</i> <sub>int</sub> = 0.0243, <i>R</i> <sub>sigma</sub> = 0.0200] |
| Data/restraints/parameters                                   | 4924/0/363                                                                   |
| Goodness-of-fit on <i>F</i> <sup>2</sup>                     | 1.068                                                                        |
| Final <i>R</i> indexes [ <i>I</i> ≥ 2 $\sigma$ ( <i>I</i> )] | <i>R</i> <sub>1</sub> = 0.0427, <i>wR</i> <sub>2</sub> = 0.1190              |
| Final <i>R</i> indexes [all data]                            | <i>R</i> <sub>1</sub> = 0.0483, <i>wR</i> <sub>2</sub> = 0.1231              |
| Largest diff. peak/hole / e Å <sup>-3</sup>                  | 0.33/-0.18                                                                   |



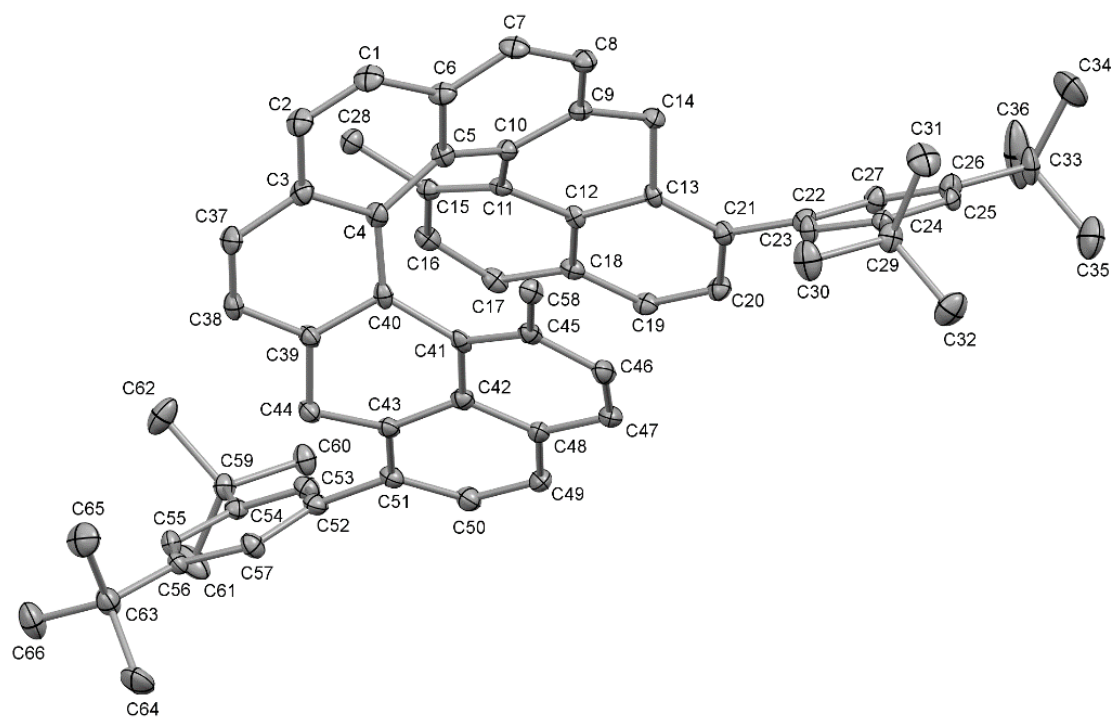

**Figure S55:** Solid-state structure of *2H-DMNC-Ar*. Hydrogen atoms are omitted for clarity.

Yellow crystals were obtained by slow evaporation from  $\text{CHCl}_3$  at 25 °C for the SC-XRD measurement.

**Table S3:** Crystal data and structure refinement for 2*H*-DMNC-Ar.

| Identification code                                          | 2 <i>H</i> -DMNC-Ar (CCDC Number: 2233870)                      |
|--------------------------------------------------------------|-----------------------------------------------------------------|
| Empirical formula                                            | C <sub>78</sub> H <sub>78</sub>                                 |
| Formula weight                                               | 1015.40                                                         |
| Temperature / K                                              | 160(1)                                                          |
| Crystal system                                               | monoclinic                                                      |
| Space group                                                  | <i>Pc</i>                                                       |
| <i>a</i> / Å                                                 | 18.35075(14)                                                    |
| <i>b</i> / Å                                                 | 9.98785(8)                                                      |
| <i>c</i> / Å                                                 | 16.08593(13)                                                    |
| $\alpha$ / °                                                 | 90                                                              |
| $\beta$ / °                                                  | 91.0918(7)                                                      |
| $\gamma$ / °                                                 | 90                                                              |
| Volume / Å <sup>3</sup>                                      | 2947.77(4)                                                      |
| <i>Z</i>                                                     | 2                                                               |
| $\rho_{\text{calc}}$ / g/cm <sup>3</sup>                     | 1.144                                                           |
| $\mu$ / mm <sup>-1</sup>                                     | 0.479                                                           |
| <i>F</i> (000)                                               | 1092.0                                                          |
| Crystal size / mm <sup>3</sup>                               | 0.19 × 0.16 × 0.06                                              |
| 2 $\Theta$ range for data collection / °                     | 4.816 to 148.968°                                               |
| Index ranges                                                 | -22 ≤ <i>h</i> ≤ 22, -12 ≤ <i>k</i> ≤ 12, -19 ≤ <i>l</i> ≤ 20   |
| Reflections collected                                        | 54916                                                           |
| Independent reflections                                      | 11491 [ <i>R</i> (int) = 0.0305]                                |
| Data/restraints/parameters                                   | 11491/2/717                                                     |
| Goodness-of-fit on <i>F</i> <sup>2</sup>                     | 1.046                                                           |
| Final <i>R</i> indexes [ <i>I</i> ≥ 2 $\sigma$ ( <i>I</i> )] | <i>R</i> <sub>1</sub> = 0.0865, <i>wR</i> <sub>2</sub> = 0.2150 |
| Final <i>R</i> indexes [all data]                            | <i>R</i> <sub>1</sub> = 0.0908, <i>wR</i> <sub>2</sub> = 0.2284 |
| Largest diff. peak/hole / e Å <sup>-3</sup>                  | 0.98/-0.27                                                      |
| Flack parameter                                              | 0.3(4)                                                          |

## Quantum Chemical Calculations

DFT calculations were performed using Gaussian 16 suite.<sup>10</sup> The multireference CASSCF calculations were performed using ORCA 5.0.3.<sup>11</sup> Geometries were optimized using the functionals listed in Tables Table S5–Table S7 and Def2SVP basis set in the gas phase. The frequency analysis was performed to verify the stationary-state geometry, where no imaginary frequency was found. TD-DFT calculations were performed on the  $\omega$ B97XD/Def2SVP-optimized geometries at the  $\omega$ B97XD/Def2SVP level of theory. The effect of the solvent was accounted for using CPCM (with CH<sub>2</sub>Cl<sub>2</sub> as solvent). Chemcraft software was used to generate graphical images of the frontier molecular orbitals.

The *tert*-butyl substituents were approximated as methyl groups for lower computational cost. For **DMNC-Ar**, the singlet geometries were optimized with spin-restricted and spin-unrestricted broken-symmetry wavefunctions, whereas the triplet geometry was optimized with spin-unrestricted wavefunctions. The B3LYP functional was used for the HOMO–LUMO energy gap calculations because the obtained gap of cethrene was close to the experimental optical energy gap and resulted in a HOMO–LUMO energy gap of 0.94 eV for **DMNC-Ar**. The hyperfine coupling constants were calculated by using unrestricted B3LYP functional EPR-III basis set and solvation effects were taken into account by using CPCM (with benzene as solvent). The isotropic EPR was simulated using WinSim software and the used parameters are shown in Table S8.<sup>12</sup> The diradical character  $\gamma_0$  was calculated via Yamaguchi's formula where the orbital occupations of the HOMO and LUMO from multireference CASSCF(2,2) calculations were used instead of natural orbital occupations from DFT.<sup>13</sup> The adiabatic singlet–triplet energy gap was calculated using the CASSCF(2,2)/NEVPT2/Def2TZVPP approach on DFT-optimized singlet and triplet geometries. The nucleus independent chemical shifts (NICS)<sup>14</sup> were calculated at the B3LYP/6-311+G(2d,p) levels of theory using gauge-independent atomic orbital method (NMR=GIAO keyword in Gaussian). ACID<sup>15,16</sup> plots were calculated at the HF/6-311G(d,p) level of theory for **DMNC-Ar** using the optimized geometry from DFT.

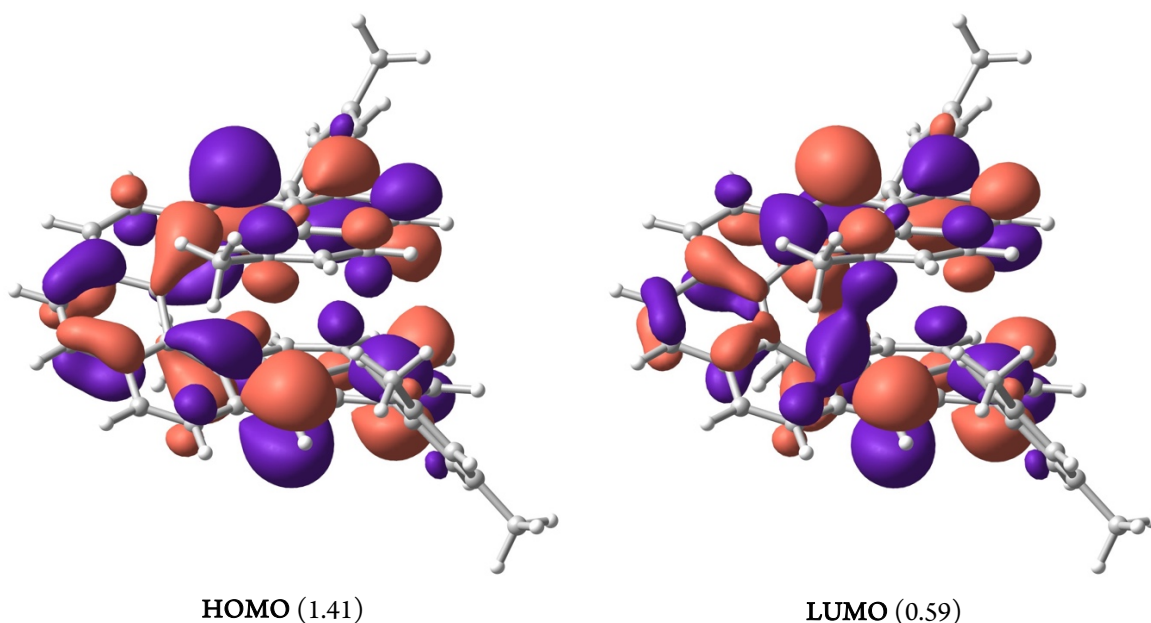

**Figure S56:** HOMO (left) and LUMO (right) of **DMNC-Ar** obtained from CAS(2,2)/NEVPT2/Def2TZVPP calculations (occupation numbers shown). Contour value = 0.022.

**Table S4:** A summary of Mulliken charges, spin densities, and isotropic fermi contact couplings for DMNC-Ar.

DMNC-Ar (triplet state)

Mulliken charges and spin densities

|      | 1         | 2         |
|------|-----------|-----------|
| 1 C  | -0.139936 | 0.000986  |
| 2 C  | -0.140099 | 0.001002  |
| 3 C  | 0.177315  | 0.049796  |
| 4 C  | 0.176987  | 0.049758  |
| 5 C  | -0.205683 | 0.028830  |
| 6 C  | -0.205126 | 0.028818  |
| 7 C  | -0.066931 | -0.050231 |
| 8 C  | 0.026668  | 0.181265  |
| 9 C  | -0.058921 | -0.082802 |
| 10 C | -0.143748 | 0.056008  |
| 11 C | -0.031455 | 0.335660  |
| 12 C | -0.153829 | -0.095961 |
| 13 C | 0.138029  | 0.069151  |
| 14 C | -0.056513 | -0.064473 |
| 15 C | -0.138555 | -0.090218 |
| 16 C | -0.099475 | 0.171274  |
| 17 C | -0.074655 | -0.086296 |
| 18 C | 0.010001  | 0.178970  |
| 19 C | 0.026652  | 0.181276  |
| 20 C | -0.058896 | -0.082776 |
| 21 C | -0.143818 | 0.056003  |
| 22 C | -0.066631 | -0.050213 |
| 23 C | -0.058638 | -0.064548 |
| 24 C | 0.137831  | 0.069159  |
| 25 C | -0.153270 | -0.095965 |
| 26 C | -0.030996 | 0.335679  |
| 27 C | -0.139428 | -0.090145 |
| 28 C | -0.091439 | 0.271847  |
| 29 C | -0.201331 | -0.124777 |
| 30 C | 0.159644  | 0.256905  |
| 31 C | -0.098853 | 0.171261  |
| 32 C | -0.074625 | -0.086298 |
| 33 C | 0.010601  | 0.178989  |
| 34 C | -0.091713 | 0.271883  |
| 35 C | -0.200000 | -0.124799 |
| 36 C | 0.158929  | 0.256979  |
| 37 C | 0.305563  | -0.026570 |
| 38 C | 0.303759  | -0.026537 |
| 39 C | -0.291709 | 0.031114  |
| 40 C | 0.076718  | -0.009688 |
| 41 C | -0.128235 | 0.027675  |
| 42 C | 0.063513  | -0.012282 |
| 43 C | -0.297372 | 0.025265  |
| 44 C | -0.364803 | 0.001501  |
| 45 C | -0.345759 | 0.001003  |
| 46 C | -0.295727 | 0.025315  |
| 47 C | 0.061243  | -0.012343 |
| 48 C | -0.136156 | 0.027771  |
| 49 C | 0.081191  | -0.009710 |
| 50 C | -0.283338 | 0.031029  |
| 51 C | -0.365602 | 0.001524  |
| 52 C | -0.345168 | 0.000986  |
| 53 C | -0.416385 | -0.014483 |
| 54 C | -0.416856 | -0.014492 |
| 55 H | 0.097930  | -0.002697 |
| 56 H | 0.097906  | -0.002697 |
| 57 H | 0.095110  | 0.003160  |
| 58 H | 0.093697  | -0.001587 |

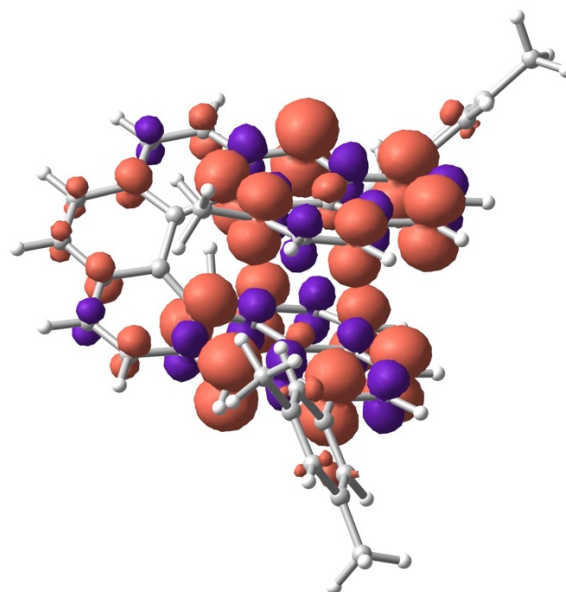

Contour value = 0.003

59 H 0.129919 -0.020595  
60 H 0.103246 -0.012367  
61 H 0.130072 0.004895  
62 H 0.093695 -0.001587  
63 H 0.095099 0.003160  
64 H 0.129595 -0.020599  
65 H 0.104613 -0.016146  
66 H 0.091216 0.005477  
67 H 0.103418 -0.012367  
68 H 0.130148 0.004903  
69 H 0.104569 -0.016144  
70 H 0.091276 0.005476  
71 H 0.108809 -0.001536  
72 H 0.084540 -0.001708  
73 H 0.137148 -0.002449  
74 H 0.122231 -0.000131  
75 H 0.127029 -0.000425  
76 H 0.113879 -0.000014  
77 H 0.121761 -0.000301  
78 H 0.107010 -0.000089  
79 H 0.128510 -0.000393  
80 H 0.137360 -0.002443  
81 H 0.084760 -0.001710  
82 H 0.108187 -0.001545  
83 H 0.114399 -0.000025  
84 H 0.121804 -0.000119  
85 H 0.127113 -0.000444  
86 H 0.106803 -0.000087  
87 H 0.128456 -0.000389  
88 H 0.121879 -0.000306  
89 H 0.135442 0.003839  
90 H 0.189172 0.010999  
91 H 0.127206 0.002534  
92 H 0.135465 0.003843  
93 H 0.189277 0.011012  
94 H 0.127278 0.002529

Sum of Mulliken charges = -0.00000 2.00000

### Isotropic Fermi Contact Couplings

| Atom     | a.u.     | MegaHertz | Gauss    | 10 <sup>(-4)</sup> cm <sup>-1</sup> |
|----------|----------|-----------|----------|-------------------------------------|
| 1 C(13)  | -0.00725 | -4.07698  | -1.45477 | -1.35994                            |
| 2 C(13)  | -0.00725 | -4.07696  | -1.45476 | -1.35993                            |
| 3 C(13)  | 0.00613  | 3.44730   | 1.23008  | 1.14989                             |
| 4 C(13)  | 0.00613  | 3.44723   | 1.23006  | 1.14987                             |
| 5 C(13)  | -0.00009 | -0.05217  | -0.01861 | -0.01740                            |
| 6 C(13)  | -0.00009 | -0.05229  | -0.01866 | -0.01744                            |
| 7 C(13)  | -0.00559 | -3.14169  | -1.12103 | -1.04795                            |
| 8 C(13)  | 0.01714  | 9.63578   | 3.43829  | 3.21415                             |
| 9 C(13)  | -0.02005 | -11.26871 | -4.02096 | -3.75884                            |
| 10 C(13) | 0.00782  | 4.39688   | 1.56892  | 1.46664                             |
| 11 C(13) | 0.02662  | 14.96165  | 5.33869  | 4.99067                             |
| 12 C(13) | -0.02193 | -12.32608 | -4.39825 | -4.11154                            |
| 13 C(13) | 0.01770  | 9.94821   | 3.54977  | 3.31836                             |
| 14 C(13) | -0.01693 | -9.51476  | -3.39510 | -3.17378                            |
| 15 C(13) | -0.01509 | -8.47973  | -3.02578 | -2.82853                            |
| 16 C(13) | 0.01412  | 7.93688   | 2.83208  | 2.64746                             |
| 17 C(13) | -0.01357 | -7.62780  | -2.72179 | -2.54436                            |
| 18 C(13) | 0.01889  | 10.61753  | 3.78860  | 3.54163                             |
| 19 C(13) | 0.01714  | 9.63598   | 3.43836  | 3.21422                             |
| 20 C(13) | -0.02005 | -11.26876 | -4.02097 | -3.75885                            |
| 21 C(13) | 0.00782  | 4.39701   | 1.56896  | 1.46669                             |
| 22 C(13) | -0.00559 | -3.14164  | -1.12102 | -1.04794                            |
| 23 C(13) | -0.01693 | -9.51467  | -3.39507 | -3.17375                            |
| 24 C(13) | 0.01770  | 9.94940   | 3.55019  | 3.31876                             |
| 25 C(13) | -0.02193 | -12.32617 | -4.39828 | -4.11157                            |
| 26 C(13) | 0.02662  | 14.96173  | 5.33872  | 4.99070                             |
| 27 C(13) | -0.01508 | -8.47911  | -3.02556 | -2.82833                            |

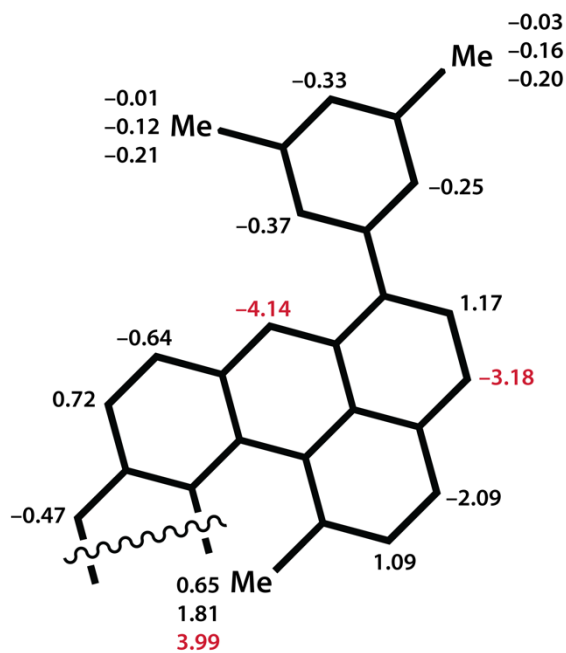

Hyperfine coupling constants of the hydrogen atoms (in Gauss), the largest values were used for the simulation (red)

|          |          |           |          |          |
|----------|----------|-----------|----------|----------|
| 28 C(13) | 0.02057  | 11.56318  | 4.12603  | 3.85706  |
| 29 C(13) | -0.01887 | -10.60793 | -3.78517 | -3.53843 |
| 30 C(13) | 0.02360  | 13.26560  | 4.73350  | 4.42493  |
| 31 C(13) | 0.01412  | 7.93642   | 2.83191  | 2.64731  |
| 32 C(13) | -0.01357 | -7.62740  | -2.72165 | -2.54423 |
| 33 C(13) | 0.01889  | 10.61698  | 3.78840  | 3.54144  |
| 34 C(13) | 0.02057  | 11.56417  | 4.12638  | 3.85739  |
| 35 C(13) | -0.01887 | -10.60803 | -3.78521 | -3.53846 |
| 36 C(13) | 0.02360  | 13.26530  | 4.73339  | 4.42483  |
| 37 C(13) | -0.00989 | -5.56054  | -1.98414 | -1.85480 |
| 38 C(13) | -0.00989 | -5.56174  | -1.98457 | -1.85520 |
| 39 C(13) | 0.00907  | 5.09592   | 1.81835  | 1.69982  |
| 40 C(13) | -0.00113 | -0.63612  | -0.22698 | -0.21219 |
| 41 C(13) | 0.00212  | 1.19013   | 0.42467  | 0.39699  |
| 42 C(13) | -0.00155 | -0.87231  | -0.31126 | -0.29097 |
| 43 C(13) | 0.00594  | 3.33661   | 1.19059  | 1.11297  |
| 44 C(13) | 0.00041  | 0.23074   | 0.08233  | 0.07697  |
| 45 C(13) | 0.00055  | 0.31006   | 0.11064  | 0.10343  |
| 46 C(13) | 0.00594  | 3.33886   | 1.19139  | 1.11372  |
| 47 C(13) | -0.00156 | -0.87634  | -0.31270 | -0.29232 |
| 48 C(13) | 0.00213  | 1.19507   | 0.42643  | 0.39863  |
| 49 C(13) | -0.00114 | -0.63852  | -0.22784 | -0.21299 |
| 50 C(13) | 0.00905  | 5.08685   | 1.81511  | 1.69679  |
| 51 C(13) | 0.00041  | 0.23156   | 0.08263  | 0.07724  |
| 52 C(13) | 0.00055  | 0.31014   | 0.11066  | 0.10345  |
| 53 C(13) | -0.00650 | -3.65356  | -1.30368 | -1.21870 |
| 54 C(13) | -0.00650 | -3.65332  | -1.30359 | -1.21861 |
| 55 H(1)  | -0.00059 | -1.32552  | -0.47298 | -0.44214 |
| 56 H(1)  | -0.00059 | -1.32545  | -0.47295 | -0.44212 |
| 57 H(1)  | 0.00090  | 2.02094   | 0.72112  | 0.67411  |
| 58 H(1)  | -0.00080 | -1.79562  | -0.64072 | -0.59896 |
| 59 H(1)  | -0.00519 | -11.60382 | -4.14053 | -3.87062 |
| 60 H(1)  | -0.00262 | -5.85716  | -2.08998 | -1.95374 |
| 61 H(1)  | 0.00137  | 3.06002   | 1.09189  | 1.02071  |
| 62 H(1)  | -0.00080 | -1.79548  | -0.64067 | -0.59891 |
| 63 H(1)  | 0.00090  | 2.02095   | 0.72112  | 0.67411  |
| 64 H(1)  | -0.00519 | -11.60355 | -4.14044 | -3.87053 |
| 65 H(1)  | -0.00399 | -8.91414  | -3.18079 | -2.97344 |
| 66 H(1)  | 0.00147  | 3.27836   | 1.16980  | 1.09354  |
| 67 H(1)  | -0.00262 | -5.85672  | -2.08982 | -1.95359 |
| 68 H(1)  | 0.00137  | 3.05998   | 1.09188  | 1.02070  |
| 69 H(1)  | -0.00399 | -8.91509  | -3.18112 | -2.97375 |
| 70 H(1)  | 0.00147  | 3.27842   | 1.16982  | 1.09356  |
| 71 H(1)  | -0.00047 | -1.05169  | -0.37527 | -0.35081 |
| 72 H(1)  | -0.00041 | -0.92592  | -0.33039 | -0.30885 |
| 73 H(1)  | -0.00032 | -0.71052  | -0.25353 | -0.23700 |
| 74 H(1)  | -0.00015 | -0.34609  | -0.12349 | -0.11544 |
| 75 H(1)  | -0.00026 | -0.58034  | -0.20708 | -0.19358 |
| 76 H(1)  | -0.00001 | -0.02167  | -0.00773 | -0.00723 |
| 77 H(1)  | -0.00019 | -0.42907  | -0.15310 | -0.14312 |
| 78 H(1)  | -0.00003 | -0.07523  | -0.02684 | -0.02509 |
| 79 H(1)  | -0.00025 | -0.55444  | -0.19784 | -0.18494 |
| 80 H(1)  | -0.00032 | -0.71315  | -0.25447 | -0.23788 |
| 81 H(1)  | -0.00042 | -0.92920  | -0.33156 | -0.30995 |
| 82 H(1)  | -0.00047 | -1.05071  | -0.37492 | -0.35048 |
| 83 H(1)  | -0.00001 | -0.03142  | -0.01121 | -0.01048 |
| 84 H(1)  | -0.00015 | -0.32686  | -0.11663 | -0.10903 |
| 85 H(1)  | -0.00027 | -0.59593  | -0.21264 | -0.19878 |
| 86 H(1)  | -0.00003 | -0.07284  | -0.02599 | -0.02430 |
| 87 H(1)  | -0.00025 | -0.55062  | -0.19648 | -0.18367 |
| 88 H(1)  | -0.00020 | -0.43666  | -0.15581 | -0.14565 |
| 89 H(1)  | 0.00227  | 5.06977   | 1.80902  | 1.69109  |
| 90 H(1)  | 0.00501  | 11.18971  | 3.99277  | 3.73248  |
| 91 H(1)  | 0.00081  | 1.82042   | 0.64957  | 0.60723  |
| 92 H(1)  | 0.00227  | 5.07134   | 1.80958  | 1.69162  |
| 93 H(1)  | 0.00501  | 11.18826  | 3.99225  | 3.73200  |
| 94 H(1)  | 0.00081  | 1.81879   | 0.64899  | 0.60668  |

For a better overview, three different functionals, some of which include long- and short-range London dispersive forces, were screened (Table S5 and Table S6). The energies of the open (o) and electrocyclicized or closed (c) forms of cethrenes are summarized in Table S7. The S–T gaps and  $\Delta E$  (open–closed) were calculated as triplet energy minus singlet energy and energy of closed minus energy of open, respectively.

**Table S5:** Energies, energy gaps, and orbital occupation numbers, and diradical characters for **DMNC-Ar** obtained from DFT and CASSCF calculations.

| functional     | Energies from DFT [kcal/mol] <sup>a</sup> |                     |                     | $\Delta E$ (open–closed) |
|----------------|-------------------------------------------|---------------------|---------------------|--------------------------|
|                | c-DMNC-Ar                                 | o-DMNC-Ar (singlet) | o-DMNC-Ar (triplet) |                          |
| B3LYP-D3       | -1305073.891                              | -1305086.016        | -1305084.321        | <b>12.125</b>            |
| PBE0           | -1303481.808                              | -1303486.462        | -1303485.019        | <b>4.654</b>             |
| $\omega$ B97DX | -1304592.318                              | -1304598.561        | -1304596.684        | <b>6.243</b>             |

<sup>a</sup>Using Def2SVP basis set including zero-point vibrational energy correction.

| functional     | Energies from CASSCF/NEVPT2 [kcal/mol] <sup>b</sup> |                     | orbital occupation <sup>b,c</sup> |      |       | S–T gap [kcal/mol] |                     |
|----------------|-----------------------------------------------------|---------------------|-----------------------------------|------|-------|--------------------|---------------------|
|                | o-DMNC-Ar (singlet)                                 | o-DMNC-Ar (triplet) | HOMO                              | LUMO | $y_0$ | DFT <sup>a</sup>   | CASSCF <sup>b</sup> |
| B3LYP-D3       | -1304298.644                                        | -1304296.691        | 1.49                              | 0.51 | 0.56  | 1.695              | <b>1.953</b>        |
| PBE0           | -1304294.107                                        | -1304293.819        | 1.33                              | 0.67 | 0.63  | 1.443              | <b>0.288</b>        |
| $\omega$ B97DX | -1304299.379                                        | -1304298.474        | 1.41                              | 0.59 | 0.59  | 1.878              | <b>0.905</b>        |

<sup>a</sup>Using Def2SVP basis set including zero-point vibrational energy correction. <sup>b</sup>Using Def2-TZVPP basis set. <sup>c</sup>From CASSCF.

**Table S6:** Energies, energy gaps, and orbital occupation numbers, and diradical characters for **NC** obtained from DFT and CASSCF calculations.

| functional                  | Energies from DFT [kcal/mol] <sup>a</sup> |                |
|-----------------------------|-------------------------------------------|----------------|
|                             | o-NC (singlet)                            | o-NC (triplet) |
| B3LYP-D3                    | -867569.7144                              | -867568.9231   |
| PBE0                        | -866522.3588                              | -866521.3856   |
| $\omega$ B97DX <sup>b</sup> | -867239.5772                              | -867238.0373   |

<sup>a</sup>Using Def2SVP basis set including zero-point vibrational energy correction. <sup>b</sup>Values taken from reference<sup>17</sup>.

| functional                  | Energies from CASSCF/NEVPT2 [kcal/mol] <sup>c</sup> |                | orbital occupation <sup>c,d</sup> |      |       | S–T gap [kcal/mol] |                     |
|-----------------------------|-----------------------------------------------------|----------------|-----------------------------------|------|-------|--------------------|---------------------|
|                             | o-NC (singlet)                                      | o-NC (triplet) | HOMO                              | LUMO | $y_0$ | DFT <sup>a</sup>   | CASSCF <sup>c</sup> |
| B3LYP-D3                    | -867021.4074                                        | -867021.4894   | 1.09                              | 0.91 | 0.85  | 0.791              | <b>-0.082</b>       |
| PBE0                        | -867018.299                                         | -867018.3574   | 1.06                              | 0.94 | 0.89  | 0.973              | <b>-0.058</b>       |
| $\omega$ B97DX <sup>b</sup> | n.a                                                 | n.a            | 1.1                               | 0.9  | 0.83  | 1.540              | <b>0.17</b>         |

<sup>a</sup>Using Def2SVP basis set including zero-point vibrational energy correction. <sup>b</sup>Values taken from reference<sup>17</sup>. <sup>c</sup>Using Def2-TZVPP basis set. <sup>d</sup>From CASSCF.

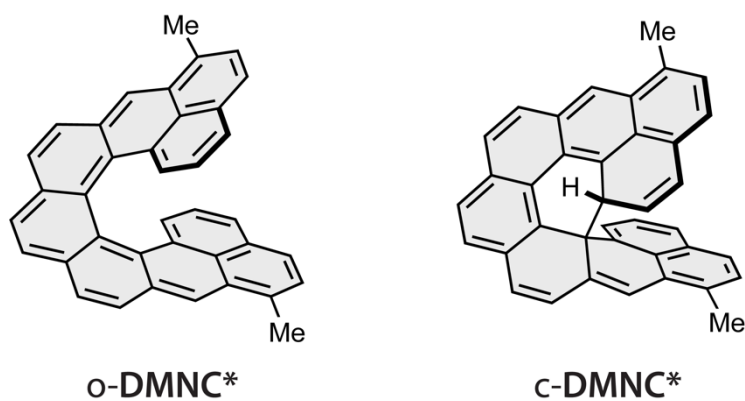

**Figure S57:** Structures of the open (left) and closed (right) form of DMNC\*.

**Table S7:** Energies for different cethrenes obtained from DFT calculations. Vertical comparisons indicate the strain which is induced by the methyl groups in the fjord region.

| functional                                | Energies from DFT [kcal/mol] <sup>a</sup> |              |                          |
|-------------------------------------------|-------------------------------------------|--------------|--------------------------|
|                                           | closed form                               | open form    | $\Delta E$ (open-closed) |
| Cethrene                                  | -674692.1609                              | -674677.4426 | <b>14.72</b>             |
| Dimethylcethrene (DMC)                    | -723951.3175                              | -723934.669  | <b>16.65</b>             |
| Nonacethrene (NC)                         | -867240.1658                              | -867239.5772 | <b>0.589</b>             |
| Dimethylnonacethrene (DMNC)               | -916492.1807                              | -916497.2698 | <b>-5.09</b>             |
| Dimethylnonacethrene*(DMNC*) <sup>b</sup> | -916501.3932                              | -916501.3838 | <b>0.00941</b>           |

<sup>a</sup>Using  $\omega$ B97DX functional and Def2SVP basis set including zero-point vibrational energy correction. <sup>b</sup>Methyl groups at different positions (see Figure S57).

**Table S8:** Summary of used parameters for the EPR simulation using WinSim.<sup>12</sup>

| parameter          | value     |
|--------------------|-----------|
| Field center       | 338.25 mT |
| Mod. Amp.          | 0.1 mT    |
| g-shift            | 2.0055    |
| Lineshape          | 0         |
| Simple LW          | 2.8       |
| HCC-1 <sup>a</sup> | 2x 5.382  |
| HCC-2 <sup>a</sup> | 2x 5.187  |
| HCC-3 <sup>a</sup> | 2x 4.137  |

<sup>a</sup>The values of the hyperfine coupling constants (HCC) from calculations (Table S4) were scaled by 130%.



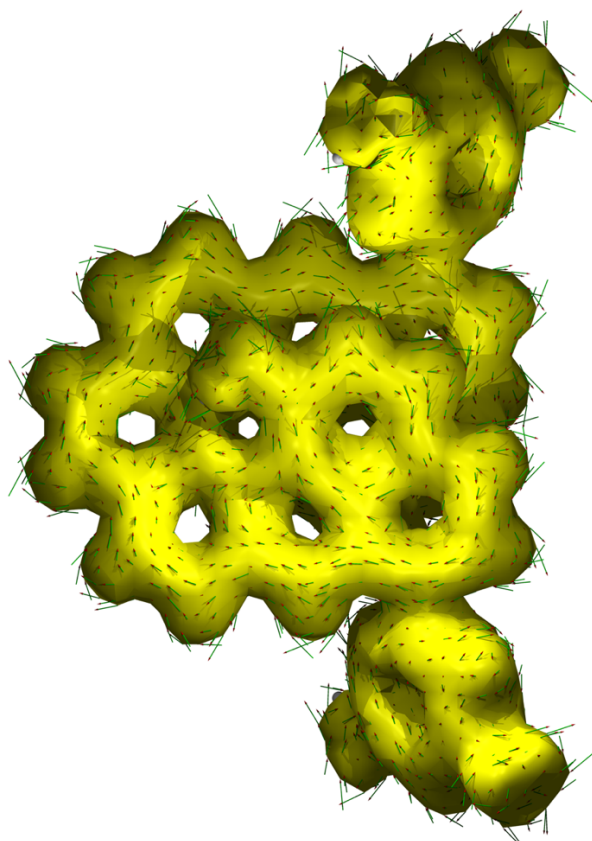

**Figure S58:** Plot of anisotropy of induced current density (ACID) for **DMNC-Ar**. The current-density vectors plotted onto the ACID isosurface indicate a diatropic ring current around the whole periphery of the backbone and within the individual benzene rings. No paratropic ring current could be found, therefore, no anti-aromatic character could be attributed to **DMNC-Ar**, which is further supported by calculations of the nucleus independent chemical shift (see Table S9 below).

**Table S9:** Out-of-plane ( $\text{NICS}_{zz}$ ) nucleus independent chemical shifts for **DMNC-Ar**. The dummy atoms placed above the rings (red dots) indicate that all rings are aromatic even though ring **C** displays much weaker aromaticity. If the dummy atoms are placed below (blue dots), this trend is not observable anymore because of the intramolecular through-space shielding. The NICS values for red dummy atoms indicate a high diradical character because in the diradical structure the main contributing resonance structure is one with two naphthalene (rings **A** and **B**) and one phenanthrene (rings **D** and **E**) aromatic units and unpaired electrons localized in rings **C**.

|          | $\text{NICS}(1)_{zz}$<br>(above, red dots) | $\text{NICS}(1)_{zz}$<br>(below, blue dots) |
|----------|--------------------------------------------|---------------------------------------------|
| <b>A</b> | -20.26                                     | -23.81                                      |
| <b>B</b> | -23.81                                     | -35.12                                      |
| <b>C</b> | -6.83                                      | -25.50                                      |
| <b>D</b> | -27.13                                     | -19.09                                      |
| <b>E</b> | -35.12                                     | -22.85                                      |

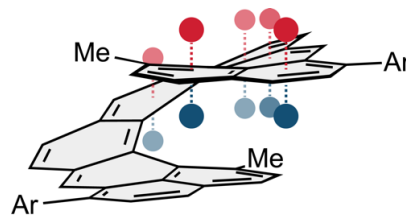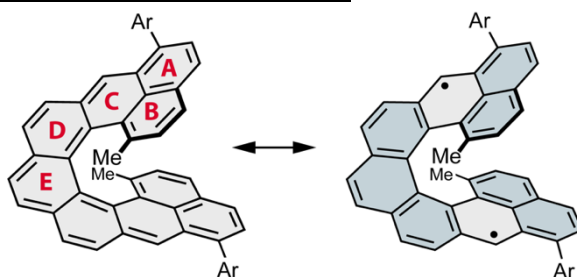

## Cartesian Coordinates

The cartesian coordinates are shown for geometries optimized at the  $\omega$ B97DX/Def2SVP level of DFT in the gas phase. The unrestricted broken-symmetry approach was utilized to adjust for the diradicaloid nature of the open forms of cethrenes, which resulted in the lowest-energy configuration.

**Table S10:** Cartesian coordinates.

|   |              |              |              |
|---|--------------|--------------|--------------|
| C | -0.861833000 | 3.114746000  | -0.099807000 |
| C | 0.541910000  | 3.101281000  | 0.022966000  |
| C | -1.585485000 | 4.314650000  | 0.058971000  |
| C | 1.228946000  | 4.316505000  | 0.023859000  |
| C | 0.502848000  | 5.525977000  | 0.104457000  |
| C | -0.873652000 | 5.525295000  | 0.175463000  |
| C | -3.024373000 | 4.253184000  | 0.166399000  |
| C | -1.576996000 | 1.875854000  | -0.339048000 |
| C | -2.987710000 | 1.834326000  | -0.158191000 |
| C | -3.685106000 | 3.070836000  | 0.116191000  |
| C | -3.656420000 | 0.622964000  | -0.290923000 |
| C | -2.969279000 | -0.556095000 | -0.626846000 |
| C | -1.560221000 | -0.485327000 | -0.880975000 |
| C | -0.881635000 | 0.746182000  | -0.766252000 |
| C | -0.838054000 | -1.681535000 | -1.214388000 |
| C | 0.587226000  | -1.573273000 | -1.498291000 |
| C | 1.242079000  | -0.410382000 | -1.426321000 |
| C | 0.593682000  | 0.911118000  | -1.118638000 |
| C | 1.258138000  | 1.750621000  | 0.092606000  |
| C | 2.770298000  | 1.890778000  | -0.049572000 |
| C | 3.377553000  | 3.192200000  | -0.271694000 |
| C | 2.676769000  | 4.333206000  | -0.156742000 |
| C | 1.001460000  | 0.925424000  | 1.384395000  |
| C | 1.765126000  | -0.292606000 | 1.454071000  |
| C | 3.022220000  | -0.405263000 | 0.767483000  |
| C | 3.557949000  | 0.820653000  | 0.197095000  |
| C | 1.337910000  | -1.369524000 | 2.267636000  |
| C | 2.061752000  | -2.588871000 | 2.243165000  |
| C | 3.221640000  | -2.701994000 | 1.520254000  |
| C | 3.743293000  | -1.596851000 | 0.801284000  |
| C | 0.216661000  | -1.177507000 | 3.112446000  |
| C | -0.340809000 | 0.065165000  | 3.207933000  |
| C | 0.055570000  | 1.157355000  | 2.379340000  |
| C | -1.502912000 | -2.882861000 | -1.256343000 |
| C | -2.895165000 | -2.954358000 | -1.008660000 |
| C | -3.634979000 | -1.833308000 | -0.719274000 |
| C | -5.103236000 | -1.959015000 | -0.501544000 |
| C | 5.050330000  | -1.751151000 | 0.107802000  |
| C | 6.152002000  | -2.276905000 | 0.795636000  |
| C | 7.387362000  | -2.446184000 | 0.167662000  |
| C | 7.505552000  | -2.089130000 | -1.180069000 |
| C | 6.425372000  | -1.571570000 | -1.898833000 |
| C | 5.204120000  | -1.406299000 | -1.239232000 |
| C | -5.595324000 | -2.744616000 | 0.541336000  |
| C | -6.972508000 | -2.899554000 | 0.746981000  |
| C | -7.851142000 | -2.249742000 | -0.119222000 |
| C | -7.389201000 | -1.458251000 | -1.179861000 |
| C | -6.013353000 | -1.321100000 | -1.357460000 |
| C | -8.366225000 | -0.796017000 | -2.116995000 |
| C | -7.476995000 | -3.742119000 | 1.890133000  |
| C | 6.556179000  | -1.232480000 | -3.361360000 |
| C | 8.578757000  | -2.965291000 | 0.930724000  |
| C | 0.729274000  | 1.709242000  | -2.443671000 |
| C | -0.585746000 | 2.477821000  | 2.746108000  |
| H | 1.053312000  | 6.469800000  | 0.124523000  |
| H | -1.422808000 | 6.462002000  | 0.297228000  |
| H | -3.570903000 | 5.185439000  | 0.329079000  |
| H | -4.769824000 | 3.035353000  | 0.243080000  |
| H | -4.734919000 | 0.591490000  | -0.129010000 |
| H | 1.120397000  | -2.482614000 | -1.786389000 |

### c-DMNC-Ar

#### Thermochemistry

Temperature: 298.150 Kelvin; Pressure: 1.00000 Atm.

Zero-point correction = 0.775427 (Hartree/Particle)

Thermal correction to Energy = 0.818114

Thermal correction to Enthalpy = 0.819058

Thermal correction to Gibbs Free Energy = 0.696861

Sum of electronic and zero-point Energies = -2078.999750

Sum of electronic and thermal Energies = -2078.957063

Sum of electronic and thermal Enthalpies = -2078.956119

Sum of electronic and thermal Free Energies = -2079.078316

Charge = 0 Multiplicity = 1

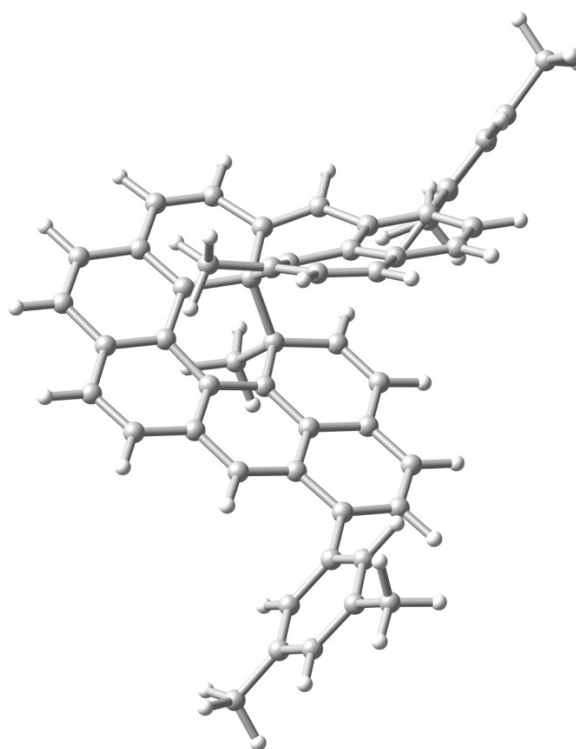

|   |              |              |              |
|---|--------------|--------------|--------------|
| H | 2.292943000  | -0.369325000 | -1.709875000 |
| H | 4.457801000  | 3.218922000  | -0.435923000 |
| H | 3.173153000  | 5.302895000  | -0.240558000 |
| H | 4.641234000  | 0.908932000  | 0.085487000  |
| H | 1.688785000  | -3.434710000 | 2.825919000  |
| H | 3.769400000  | -3.646792000 | 1.505016000  |
| H | -0.145076000 | -2.005019000 | 3.726955000  |
| H | -1.138701000 | 0.243870000  | 3.933584000  |
| H | -0.951461000 | -3.795229000 | -1.496045000 |
| H | -3.400700000 | -3.920877000 | -1.072306000 |
| H | 6.043843000  | -2.540138000 | 1.851538000  |
| H | 8.468520000  | -2.219604000 | -1.683778000 |
| H | 4.348229000  | -1.012187000 | -1.792319000 |
| H | -4.887739000 | -3.236611000 | 1.214758000  |
| H | -8.929599000 | -2.360646000 | 0.031502000  |
| H | -5.631270000 | -0.714379000 | -2.183128000 |
| H | -9.168364000 | -0.286240000 | -1.562339000 |
| H | -8.845571000 | -1.539300000 | -2.774016000 |
| H | -7.870413000 | -0.054447000 | -2.758749000 |
| H | -7.072665000 | -4.764688000 | 1.837134000  |
| H | -8.573701000 | -3.811055000 | 1.888697000  |
| H | -7.166393000 | -3.319628000 | 2.858548000  |
| H | 7.596912000  | -1.002767000 | -3.630638000 |
| H | 5.933480000  | -0.366812000 | -3.629890000 |
| H | 6.230908000  | -2.077827000 | -3.989236000 |
| H | 8.271280000  | -3.548538000 | 1.810141000  |
| H | 9.206508000  | -2.133112000 | 1.288564000  |
| H | 9.212087000  | -3.605286000 | 0.299236000  |
| H | 0.202181000  | 2.670921000  | -2.416336000 |
| H | 0.313301000  | 1.113660000  | -3.267966000 |
| H | 1.791756000  | 1.902541000  | -2.658739000 |
| H | -1.613607000 | 2.565698000  | 2.362755000  |
| H | -0.016397000 | 3.348151000  | 2.407007000  |
| H | -0.647623000 | 2.530924000  | 3.843383000  |

### o-DMNC-Ar (broken-symmetry unrestricted singlet)

|   |              |              |              |
|---|--------------|--------------|--------------|
| C | -0.652226000 | 3.203486000  | -0.313170000 |
| C | 0.652218000  | 3.203489000  | 0.313156000  |
| C | -1.370634000 | 4.425260000  | -0.356785000 |
| C | 1.370613000  | 4.425270000  | 0.356779000  |
| C | 0.673809000  | 5.645117000  | 0.127604000  |
| C | -0.673837000 | 5.645112000  | -0.127618000 |
| C | -2.775903000 | 4.392496000  | -0.624350000 |
| C | -1.261427000 | 2.029086000  | -0.866184000 |
| C | -2.679901000 | 1.975997000  | -0.892910000 |
| C | -3.420082000 | 3.201747000  | -0.789530000 |
| C | -3.321339000 | 0.725767000  | -0.950784000 |
| C | -2.583679000 | -0.478083000 | -0.990427000 |
| C | -1.181572000 | -0.395819000 | -1.304306000 |
| C | -0.531077000 | 0.873751000  | -1.371996000 |
| C | -0.456766000 | -1.586502000 | -1.587401000 |
| C | 0.878423000  | -1.481463000 | -2.032807000 |
| C | 1.426154000  | -0.239778000 | -2.275505000 |
| C | 0.744997000  | 0.954592000  | -1.982235000 |
| C | 1.261414000  | 2.029096000  | 0.866194000  |
| C | 2.679887000  | 1.976023000  | 0.892957000  |
| C | 3.420061000  | 3.201778000  | 0.789583000  |
| C | 2.775875000  | 4.392519000  | 0.624375000  |
| C | 0.531069000  | 0.873753000  | 1.372002000  |
| C | 1.181578000  | -0.395810000 | 1.304318000  |
| C | 2.583689000  | -0.478059000 | 0.990447000  |
| C | 3.321337000  | 0.725799000  | 0.950838000  |
| C | 0.456782000  | -1.586503000 | 1.587404000  |
| C | 1.099154000  | -2.842090000 | 1.430763000  |
| C | 2.421289000  | -2.913849000 | 1.039175000  |
| C | 3.186781000  | -1.756316000 | 0.817592000  |
| C | -0.878416000 | -1.481482000 | 2.032787000  |
| C | -1.426170000 | -0.239805000 | 2.275469000  |
| C | -0.745026000 | 0.954573000  | 1.982210000  |
| C | -1.099120000 | -2.842097000 | -1.430748000 |
| C | -2.421254000 | -2.913872000 | -1.039153000 |

### **Thermochemistry**

Temperature: 298.150 Kelvin; Pressure: 1.00000 Atm.

Zero-point correction = 0.771642 (Hartree/Particle)

Thermal correction to Energy = 0.814689

Thermal correction to Enthalpy = 0.815634

Thermal correction to Gibbs Free Energy = 0.694382

Sum of electronic and zero-point Energies = -2079.009699

Sum of electronic and thermal Energies = -2078.966652

Sum of electronic and thermal Enthalpies = -2078.965707

Sum of electronic and thermal Free Energies = -2079.086959

Charge = 0 Multiplicity = 1

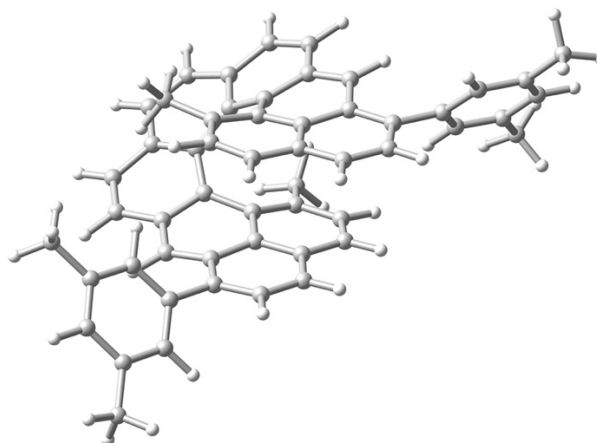

|   |              |              |              |
|---|--------------|--------------|--------------|
| C | -3.186756000 | -1.756346000 | -0.817575000 |
| C | -4.597273000 | -1.899459000 | -0.376706000 |
| C | 4.597293000  | -1.899426000 | 0.376714000  |
| C | -5.481133000 | -2.729765000 | -1.071323000 |
| C | -6.803571000 | -2.902570000 | -0.645841000 |
| C | -7.227029000 | -2.231798000 | 0.502262000  |
| C | -6.364815000 | -1.398813000 | 1.227358000  |
| C | -5.055993000 | -1.241071000 | 0.774959000  |
| C | -7.748060000 | -3.772360000 | -1.434994000 |
| C | -6.842521000 | -0.712867000 | 2.481380000  |
| C | 5.055997000  | -1.241083000 | -0.775001000 |
| C | 6.364804000  | -1.398830000 | -1.227403000 |
| C | 7.227035000  | -2.231810000 | -0.502297000 |
| C | 6.803596000  | -2.902543000 | 0.645819000  |
| C | 5.481159000  | -2.729706000 | 1.071330000  |
| C | 7.748003000  | -3.772462000 | 1.434927000  |
| C | 6.842620000  | -0.712761000 | -2.481316000 |
| C | 1.393026000  | 2.241699000  | -2.426307000 |
| C | -1.393084000 | 2.241668000  | 2.426267000  |
| H | 1.222125000  | 6.586723000  | 0.208984000  |
| H | -1.222162000 | 6.586714000  | -0.208991000 |
| H | -3.332391000 | 5.332831000  | -0.628145000 |
| H | -4.507996000 | 3.163041000  | -0.883262000 |
| H | -4.411349000 | 0.691693000  | -0.912649000 |
| H | 1.451216000  | -2.389753000 | -2.232254000 |
| H | 2.421788000  | -0.172079000 | -2.722382000 |
| H | 4.507973000  | 3.163082000  | 0.883336000  |
| H | 3.332356000  | 5.332859000  | 0.628174000  |
| H | 4.411348000  | 0.691740000  | 0.912737000  |
| H | 0.526084000  | -3.753752000 | 1.614084000  |
| H | 2.890821000  | -3.888777000 | 0.888386000  |
| H | -1.451202000 | -2.389780000 | 2.232218000  |
| H | -2.421810000 | -0.172117000 | 2.722332000  |
| H | -0.526043000 | -3.753752000 | -1.614084000 |
| H | -2.890780000 | -3.888804000 | -0.888370000 |
| H | -5.134737000 | -3.239678000 | -1.974831000 |
| H | -8.258060000 | -2.360467000 | 0.846537000  |
| H | -4.363182000 | -0.604460000 | 1.330828000  |
| H | -7.270599000 | -4.720315000 | -1.724438000 |
| H | -8.061431000 | -3.268400000 | -2.363363000 |
| H | -8.655222000 | -4.008220000 | -0.861233000 |
| H | -7.808150000 | -0.210860000 | 2.318396000  |
| H | -6.121506000 | 0.040574000  | 2.828195000  |
| H | -6.986454000 | -1.439348000 | 3.297022000  |
| H | 4.363171000  | -0.604515000 | -1.330901000 |
| H | 8.258056000  | -2.360500000 | -0.846598000 |
| H | 5.134787000  | -3.239595000 | 1.974862000  |
| H | 8.655975000  | -4.006854000 | 0.861851000  |
| H | 7.271042000  | -4.721189000 | 1.722685000  |
| H | 8.059920000  | -3.269388000 | 2.364261000  |
| H | 6.120423000  | 0.038864000  | -2.829599000 |
| H | 6.989263000  | -1.439496000 | -3.296237000 |
| H | 7.806926000  | -0.208497000 | -2.317401000 |
| H | 1.867707000  | 2.086303000  | -3.406720000 |
| H | 2.181170000  | 2.574765000  | -1.733996000 |
| H | 0.671054000  | 3.061586000  | -2.524942000 |
| H | -1.867806000 | 2.086253000  | 3.406659000  |
| H | -2.181206000 | 2.574743000  | 1.733932000  |
| H | -0.671120000 | 3.061555000  | 2.524944000  |

### o-DMNC-Ar (unrestricted triplet)

|   |              |              |              |
|---|--------------|--------------|--------------|
| C | -0.657192000 | 3.192937000  | -0.303134000 |
| C | 0.657069000  | 3.192980000  | 0.303010000  |
| C | -1.370731000 | 4.412055000  | -0.342319000 |
| C | 1.370573000  | 4.412121000  | 0.342100000  |
| C | 0.672191000  | 5.637192000  | 0.120028000  |
| C | -0.672389000 | 5.637163000  | -0.120326000 |
| C | -2.779706000 | 4.387995000  | -0.592305000 |
| C | -1.285563000 | 2.013522000  | -0.840974000 |
| C | -2.701048000 | 1.973069000  | -0.855310000 |
| C | -3.433210000 | 3.202069000  | -0.744634000 |
| C | -3.359553000 | 0.728212000  | -0.922360000 |
| C | -2.636887000 | -0.479037000 | -0.973527000 |
| C | -1.233550000 | -0.408760000 | -1.288304000 |
| C | -0.570811000 | 0.853892000  | -1.354143000 |
| C | -0.521268000 | -1.606527000 | -1.576064000 |
| C | 0.815918000  | -1.514417000 | -2.017020000 |
| C | 1.377079000  | -0.277442000 | -2.257434000 |
| C | 0.705810000  | 0.922761000  | -1.968976000 |
| C | 1.285482000  | 2.013623000  | 0.840934000  |
| C | 2.700969000  | 1.973208000  | 0.855248000  |
| C | 3.433092000  | 3.202222000  | 0.744476000  |
| C | 2.779551000  | 4.388119000  | 0.592072000  |
| C | 0.570777000  | 0.854016000  | 1.354219000  |
| C | 1.233545000  | -0.408626000 | 1.288461000  |
| C | 2.636876000  | -0.478895000 | 0.973650000  |
| C | 3.359505000  | 0.728372000  | 0.922385000  |
| C | 0.521293000  | -1.606383000 | 1.576332000  |
| C | 1.177995000  | -2.855122000 | 1.426823000  |
| C | 2.503487000  | -2.916284000 | 1.039808000  |
| C | 3.256314000  | -1.754320000 | 0.811685000  |
| C | -0.815898000 | -1.514269000 | 2.017272000  |
| C | -1.377095000 | -0.277290000 | 2.257582000  |
| C | -0.705837000 | 0.922903000  | 1.969060000  |
| C | -1.177937000 | -2.855268000 | -1.426454000 |
| C | -2.503441000 | -2.916426000 | -1.039464000 |
| C | -3.256298000 | -1.754462000 | -0.811480000 |
| C | -4.667326000 | -1.883833000 | -0.368999000 |
| C | 4.667300000  | -1.883704000 | 0.369099000  |
| C | -5.562765000 | -2.696407000 | -1.069819000 |
| C | -6.886366000 | -2.857258000 | -0.643279000 |
| C | -7.299359000 | -2.192571000 | 0.512122000  |
| C | -6.425466000 | -1.377612000 | 1.243760000  |
| C | -5.115722000 | -1.231275000 | 0.790191000  |
| C | -7.842468000 | -3.708426000 | -1.438730000 |
| C | -6.891311000 | -0.700114000 | 2.506812000  |
| C | 5.115640000  | -1.231146000 | -0.790018000 |
| C | 6.425290000  | -1.377916000 | -1.243955000 |
| C | 7.298992000  | -2.193280000 | -0.512726000 |
| C | 6.886089000  | -2.857852000 | 0.642893000  |
| C | 5.562697000  | -2.696710000 | 1.069665000  |
| C | 7.843513000  | -3.707161000 | 1.438735000  |
| C | 6.891350000  | -0.700051000 | -2.506742000 |
| C | 1.352747000  | 2.203193000  | -2.435870000 |
| C | -1.352793000 | 2.203352000  | 2.435885000  |
| H | 1.223860000  | 6.577162000  | 0.196870000  |
| H | -1.224086000 | 6.577109000  | -0.197238000 |
| H | -3.329444000 | 5.332258000  | -0.591297000 |
| H | -4.522306000 | 3.169491000  | -0.825702000 |
| H | -4.449719000 | 0.707720000  | -0.881390000 |
| H | 1.379956000  | -2.428174000 | -2.216373000 |
| H | 2.373833000  | -0.219849000 | -2.703345000 |
| H | 4.522190000  | 3.169684000  | 0.825530000  |
| H | 3.329262000  | 5.332397000  | 0.590990000  |
| H | 4.449670000  | 0.707905000  | 0.881398000  |
| H | 0.613605000  | -3.772089000 | 1.611019000  |
| H | 2.982218000  | -3.887792000 | 0.895898000  |
| H | -1.379913000 | -2.428027000 | 2.216690000  |
| H | -2.373861000 | -0.219682000 | 2.703466000  |
| H | -0.613518000 | -3.772237000 | -1.610554000 |
| H | -2.982162000 | -3.887929000 | -0.895487000 |
| H | -5.224352000 | -3.201329000 | -1.979141000 |

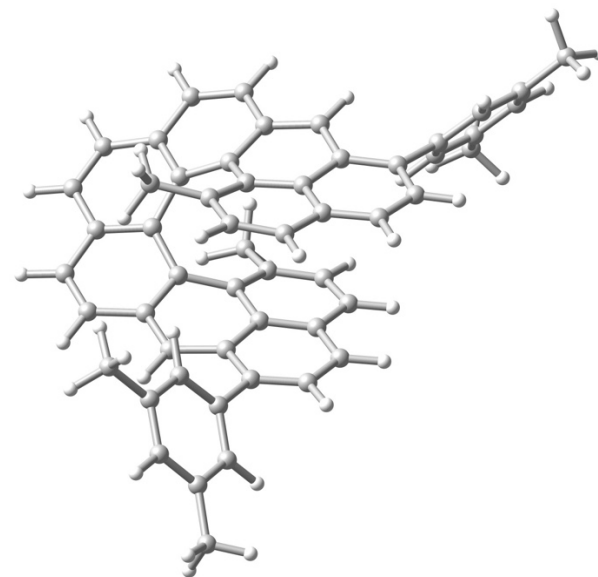

#### **Thermochemistry**

Temperature: 298.150 Kelvin; Pressure: 1.00000 Atm.

Zero-point correction = 0.771812 (Hartree/Particle)

Thermal correction to Energy = 0.814918

Thermal correction to Enthalpy = 0.815862

Thermal correction to Gibbs Free Energy = 0.693540

Sum of electronic and zero-point Energies = -2079.006707

Sum of electronic and thermal Energies = -2078.963601

Sum of electronic and thermal Enthalpies = -2078.962657

Sum of electronic and thermal Free Energies = -2079.084979

Charge = 0 Multiplicity = 3

|   |              |              |              |
|---|--------------|--------------|--------------|
| H | -8.331349000 | -2.311553000 | 0.856959000  |
| H | -4.414375000 | -0.608460000 | 1.351207000  |
| H | -7.381814000 | -4.665915000 | -1.724203000 |
| H | -8.139029000 | -3.199099000 | -2.369645000 |
| H | -8.758090000 | -3.926015000 | -0.871258000 |
| H | -7.864628000 | -0.208141000 | 2.360398000  |
| H | -6.172917000 | 0.059700000  | 2.845101000  |
| H | -7.014607000 | -1.430571000 | 3.322388000  |
| H | 4.414323000  | -0.608251000 | -1.350973000 |
| H | 8.330752000  | -2.312920000 | -0.858074000 |
| H | 5.224192000  | -3.201866000 | 1.978807000  |
| H | 8.743349000  | -3.954027000 | 0.858057000  |
| H | 7.372693000  | -4.649155000 | 1.756838000  |
| H | 8.168620000  | -3.180854000 | 2.350580000  |
| H | 6.168422000  | 0.053051000  | -2.850297000 |
| H | 7.024533000  | -1.431577000 | -3.319761000 |
| H | 7.859919000  | -0.199686000 | -2.357059000 |
| H | 1.806074000  | 2.036272000  | -3.424512000 |
| H | 2.156524000  | 2.539107000  | -1.763396000 |
| H | 0.632811000  | 3.025344000  | -2.528703000 |
| H | -1.805979000 | 2.036520000  | 3.424608000  |
| H | -2.156673000 | 2.539104000  | 1.763451000  |
| H | -0.632917000 | 3.025573000  | 2.528516000  |

### o-cethrene (broken-symmetry unrestricted singlet)

|   |              |              |              |
|---|--------------|--------------|--------------|
| C | 2.781032000  | 2.124357000  | 0.373237000  |
| C | 1.406355000  | 2.112128000  | 0.148764000  |
| C | 0.711190000  | 0.867787000  | -0.045754000 |
| C | 1.535381000  | -0.295644000 | -0.386425000 |
| C | 2.937317000  | -0.264975000 | -0.118540000 |
| C | 3.564071000  | 0.942241000  | 0.331370000  |
| C | 0.667644000  | 3.346733000  | 0.112391000  |
| C | -0.667639000 | 3.346734000  | -0.112385000 |
| C | -1.406351000 | 2.112129000  | -0.148757000 |
| C | -0.711188000 | 0.867788000  | 0.045765000  |
| C | -2.781028000 | 2.124358000  | -0.373238000 |
| C | -3.564067000 | 0.942244000  | -0.331375000 |
| C | -2.937316000 | -0.264973000 | 0.118539000  |
| C | -1.535382000 | -0.295644000 | 0.386431000  |
| C | -3.743121000 | -1.418390000 | 0.356658000  |
| C | -3.151670000 | -2.559537000 | 0.947180000  |
| C | -1.822987000 | -2.531873000 | 1.330149000  |
| C | -1.026527000 | -1.415067000 | 1.062175000  |
| C | -4.938095000 | 0.940163000  | -0.624526000 |
| C | -5.703765000 | -0.220558000 | -0.464580000 |
| C | -5.126931000 | -1.376476000 | 0.028323000  |
| C | 3.743119000  | -1.418393000 | -0.356662000 |
| C | 3.151664000  | -2.559540000 | -0.947180000 |
| C | 1.822978000  | -2.531877000 | -1.330139000 |
| C | 1.026520000  | -1.415069000 | -1.062162000 |
| H | -0.015677000 | -1.423802000 | -1.379029000 |
| H | 1.383279000  | -3.389392000 | -1.843695000 |
| H | -3.766975000 | -3.443023000 | 1.132900000  |
| H | -1.383295000 | -3.389387000 | 1.843712000  |
| H | 0.015666000  | -1.423799000 | 1.379054000  |
| H | -3.274262000 | 3.076447000  | -0.585827000 |
| H | -5.409101000 | 1.864998000  | -0.965853000 |
| H | -6.768631000 | -0.203216000 | -0.706197000 |
| H | -5.732300000 | -2.271519000 | 0.189618000  |
| H | 3.766968000  | -3.443027000 | -1.132900000 |
| C | 5.126930000  | -1.376479000 | -0.028336000 |
| H | 1.218209000  | 4.284223000  | 0.219110000  |
| H | -1.218204000 | 4.284224000  | -0.219107000 |
| C | 4.938100000  | 0.940160000  | 0.624513000  |
| H | 3.274269000  | 3.076446000  | 0.585821000  |
| C | 5.703769000  | -0.220562000 | 0.464564000  |
| H | 5.409110000  | 1.864994000  | 0.965837000  |
| H | 6.768636000  | -0.203220000 | 0.706175000  |
| H | 5.732297000  | -2.271523000 | -0.189633000 |

### **Thermochemistry**

Temperature: 298.150 Kelvin; Pressure: 1.00000 Atm.

Zero-point correction = 0.349000 (Hartree/Particle)

Thermal correction to Energy = 0.366964

Thermal correction to Enthalpy = 0.367908

Thermal correction to Gibbs Free Energy = 0.304020

Sum of electronic and zero-point Energies = -1075.166713

Sum of electronic and thermal Energies = -1075.148749

Sum of electronic and thermal Enthalpies = -1075.147804

Sum of electronic and thermal Free Energies = -1075.211693

Charge = 0 Multiplicity = 1

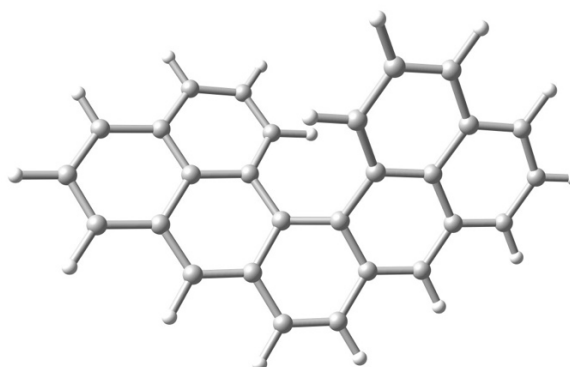

### c-cethrene

|   |              |              |              |
|---|--------------|--------------|--------------|
| C | 0.003928000  | 5.655769000  | -0.206982000 |
| C | -0.084403000 | 4.951909000  | -1.434604000 |
| C | -0.137911000 | 3.576208000  | -1.459450000 |
| C | -0.102077000 | 2.840989000  | -0.227460000 |
| C | 0.011732000  | 3.549523000  | 1.005872000  |
| C | 0.054260000  | 4.975927000  | 0.981142000  |
| C | 0.059332000  | 2.820708000  | 2.209879000  |
| C | 0.047192000  | 1.434547000  | 2.211249000  |
| C | -0.011732000 | 0.729189000  | 0.969847000  |
| C | -0.145244000 | 1.427576000  | -0.227600000 |
| C | 0.011732000  | -0.729189000 | 0.969847000  |
| C | -0.047192000 | -1.434547000 | 2.211249000  |
| C | -0.038495000 | -0.673917000 | 3.446941000  |
| C | 0.038495000  | 0.673917000  | 3.446941000  |
| C | 0.145244000  | -1.427576000 | -0.227600000 |
| C | 0.418968000  | -0.647333000 | -1.499933000 |
| C | -0.418968000 | 0.647333000  | -1.499933000 |
| C | -0.291753000 | 1.487959000  | -2.739050000 |
| C | -0.192637000 | 2.822150000  | -2.710915000 |
| C | 0.102077000  | -2.840989000 | -0.227460000 |
| C | -0.011732000 | -3.549523000 | 1.005872000  |
| C | -0.059332000 | -2.820708000 | 2.209879000  |
| C | 0.137911000  | -3.576208000 | -1.459450000 |
| C | 0.084403000  | -4.951909000 | -1.434604000 |
| C | -0.003928000 | -5.655769000 | -0.206982000 |
| C | -0.054260000 | -4.975927000 | 0.981142000  |
| C | 0.192637000  | -2.822150000 | -2.710915000 |
| C | 0.291753000  | -1.487959000 | -2.739050000 |
| H | -0.355412000 | 0.982313000  | -3.704673000 |
| H | 0.152918000  | -3.388744000 | -3.644989000 |
| H | 0.355412000  | -0.982313000 | -3.704673000 |
| H | -0.100390000 | -3.361380000 | 3.159215000  |
| H | -0.130668000 | -5.515526000 | 1.928115000  |
| H | -0.039752000 | -6.747197000 | -0.215757000 |
| H | 0.103498000  | -5.507409000 | -2.375544000 |
| H | -0.152918000 | 3.388744000  | -3.644989000 |
| H | 0.069893000  | 1.226077000  | 4.389367000  |
| H | -0.069893000 | -1.226077000 | 4.389367000  |
| H | 0.100390000  | 3.361380000  | 3.159215000  |
| H | 0.130668000  | 5.515526000  | 1.928115000  |
| H | 0.039752000  | 6.747197000  | -0.215757000 |
| H | -0.103498000 | 5.507409000  | -2.375544000 |
| H | 1.481590000  | -0.321689000 | -1.449347000 |
| H | -1.481590000 | 0.321689000  | -1.449347000 |

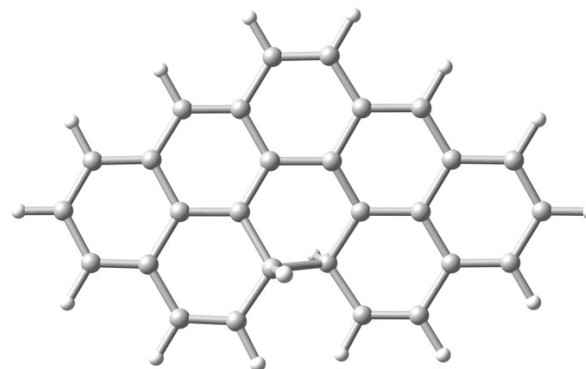

### **Thermochemistry**

Temperature: 298.150 Kelvin; Pressure: 1.00000 Atm.

Zero-point correction = 0.353493 (Hartree/Particle)

Thermal correction to Energy = 0.370606

Thermal correction to Enthalpy = 0.371550

Thermal correction to Gibbs Free Energy = 0.310387

Sum of electronic and zero-point Energies = -1075.190168

Sum of electronic and thermal Energies = -1075.173055

Sum of electronic and thermal Enthalpies = -1075.172111

Sum of electronic and thermal Free Energies = -1075.233274

Charge = 0 Multiplicity = 1

### o-DMC (broken-symmetry unrestricted singlet)

|   |              |              |              |
|---|--------------|--------------|--------------|
| C | -0.470893000 | -5.610203000 | -0.206858000 |
| C | 0.008665000  | -5.009370000 | -1.353480000 |
| C | 0.394221000  | -3.642273000 | -1.348090000 |
| C | 0.222473000  | -2.867648000 | -0.168157000 |
| C | -0.222641000 | -3.521915000 | 1.026572000  |
| C | -0.561648000 | -4.878720000 | 0.985454000  |
| C | -0.222473000 | -2.779868000 | 2.246873000  |
| C | -0.023725000 | -1.412643000 | 2.267567000  |
| C | 0.136058000  | -0.690960000 | 1.021821000  |
| C | 0.549566000  | -1.471466000 | -0.151388000 |
| C | -0.136058000 | 0.690960000  | 1.021821000  |
| C | 0.023725000  | 1.412643000  | 2.267567000  |
| C | 0.046882000  | 0.674908000  | 3.506533000  |
| C | -0.046882000 | -0.674908000 | 3.506533000  |
| C | 0.994299000  | -3.026891000 | -2.474153000 |
| C | 1.479253000  | -1.744959000 | -2.376769000 |
| C | 1.302206000  | -0.948609000 | -1.220894000 |
| C | -0.549566000 | 1.471466000  | -0.151388000 |
| C | -0.222473000 | 2.867648000  | -0.168157000 |
| C | 0.222641000  | 3.521915000  | 1.026572000  |
| C | 0.222473000  | 2.779868000  | 2.246873000  |
| C | -0.394221000 | 3.642273000  | -1.348090000 |
| C | -0.008665000 | 5.009370000  | -1.353480000 |
| C | 0.470893000  | 5.610203000  | -0.206858000 |

### **Thermochemistry**

Temperature: 298.150 Kelvin; Pressure: 1.00000 Atm.

Zero-point correction = 0.405024 (Hartree/Particle)

Thermal correction to Energy = 0.425832

Thermal correction to Enthalpy = 0.426776

Thermal correction to Gibbs Free Energy = 0.358470

Sum of electronic and zero-point Energies = -1153.663083

Sum of electronic and thermal Energies = -1153.642274

Sum of electronic and thermal Enthalpies = -1153.641330

Sum of electronic and thermal Free Energies = -1153.709636

Charge = 0 Multiplicity = 1

|   |              |              |              |
|---|--------------|--------------|--------------|
| C | 0.561648000  | 4.878720000  | 0.985454000  |
| C | -0.994299000 | 3.026891000  | -2.474153000 |
| C | -1.479253000 | 1.744959000  | -2.376769000 |
| C | -1.302206000 | 0.948609000  | -1.220894000 |
| C | 1.997038000  | 0.387927000  | -1.213802000 |
| H | 2.027760000  | -1.313894000 | -3.218569000 |
| H | -1.124476000 | 3.602277000  | -3.393803000 |
| H | -2.027760000 | 1.313894000  | -3.218569000 |
| C | -1.997038000 | -0.387927000 | -1.213802000 |
| H | 0.417280000  | 3.307430000  | 3.184285000  |
| H | 0.889574000  | 5.370693000  | 1.904364000  |
| H | 0.754336000  | 6.664721000  | -0.218432000 |
| H | -0.121039000 | 5.583901000  | -2.276015000 |
| H | 1.124476000  | -3.602277000 | -3.393803000 |
| H | -0.106883000 | -1.235177000 | 4.442547000  |
| H | 0.106883000  | 1.235177000  | 4.442547000  |
| H | -0.417280000 | -3.307430000 | 3.184285000  |
| H | -0.889574000 | -5.370693000 | 1.904364000  |
| H | -0.754336000 | -6.664721000 | -0.218432000 |
| H | 0.121039000  | -5.583901000 | -2.276015000 |
| H | 2.992938000  | 0.278122000  | -1.668665000 |
| H | 1.450316000  | 1.140771000  | -1.801842000 |
| H | 2.124571000  | 0.789618000  | -0.201241000 |
| H | -2.992938000 | -0.278122000 | -1.668665000 |
| H | -1.450316000 | -1.140771000 | -1.801842000 |
| H | -2.124571000 | -0.789618000 | -0.201241000 |

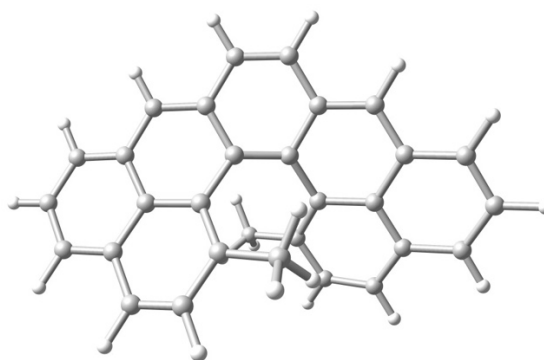

|   |              |              |              |
|---|--------------|--------------|--------------|
| C | -0.000461000 | 5.664770000  | -0.064325000 |
| C | -0.022101000 | 4.964864000  | -1.297057000 |
| C | -0.065702000 | 3.589075000  | -1.330154000 |
| C | -0.090109000 | 2.845871000  | -0.102642000 |
| C | -0.024673000 | 3.551580000  | 1.135849000  |
| C | 0.005343000  | 4.978532000  | 1.120805000  |
| C | 0.000550000  | 2.818915000  | 2.336559000  |
| C | 0.011728000  | 1.432964000  | 2.330373000  |
| C | -0.024673000 | 0.730132000  | 1.086076000  |
| C | -0.135380000 | 1.431692000  | -0.111997000 |
| C | 0.024673000  | -0.730132000 | 1.086076000  |
| C | -0.011728000 | -1.432964000 | 2.330373000  |
| C | -0.017569000 | -0.674342000 | 3.566566000  |
| C | 0.017569000  | 0.674342000  | 3.566566000  |
| C | 0.135380000  | -1.431692000 | -0.111997000 |
| C | 0.416402000  | -0.661679000 | -1.399508000 |
| C | -0.416402000 | 0.661679000  | -1.399508000 |
| C | -0.135839000 | 1.508607000  | -2.618774000 |
| C | -0.027684000 | 2.840721000  | -2.584238000 |
| C | 0.090109000  | -2.845871000 | -0.102642000 |
| C | 0.024673000  | -3.551580000 | 1.135849000  |
| C | -0.000550000 | -2.818915000 | 2.336559000  |
| C | 0.065702000  | -3.589075000 | -1.330154000 |
| C | 0.022101000  | -4.964864000 | -1.297057000 |
| C | 0.000461000  | -5.664770000 | -0.064325000 |
| C | -0.005343000 | -4.978532000 | 1.120805000  |
| C | 0.027684000  | -2.840721000 | -2.584238000 |
| C | 0.135839000  | -1.508607000 | -2.618774000 |
| C | -1.932626000 | 0.335590000  | -1.427627000 |
| H | -0.115287000 | 1.004950000  | -3.587731000 |
| H | -0.099608000 | -3.407208000 | -3.510428000 |
| H | 0.115287000  | -1.004950000 | -3.587731000 |
| C | 1.932626000  | -0.335590000 | -1.427627000 |
| H | -0.015880000 | -3.354733000 | 3.289359000  |
| H | -0.039590000 | -5.512643000 | 2.073352000  |
| H | -0.026421000 | -6.756470000 | -0.066595000 |
| H | -0.008036000 | -5.523358000 | -2.235966000 |
| H | 0.099608000  | 3.407208000  | -3.510428000 |
| H | 0.032308000  | 1.228386000  | 4.508247000  |
| H | -0.032308000 | -1.228386000 | 4.508247000  |
| H | 0.015880000  | 3.354733000  | 3.289359000  |
| H | 0.039590000  | 5.512643000  | 2.073352000  |
| H | 0.026421000  | 6.756470000  | -0.066595000 |

### c-DMC

#### Thermochemistry

Temperature: 298.150 Kelvin; Pressure: 1.00000 Atm.

Zero-point correction = 0.409281 (Hartree/Particle)

Thermal correction to Energy = 0.429258

Thermal correction to Enthalpy = 0.430203

Thermal correction to Gibbs Free Energy = 0.364071

Sum of electronic and zero-point Energies = -1153.689614

Sum of electronic and thermal Energies = -1153.669637

Sum of electronic and thermal Enthalpies = -1153.668693

Sum of electronic and thermal Free Energies = -1153.734824

Charge = 0 Multiplicity = 1

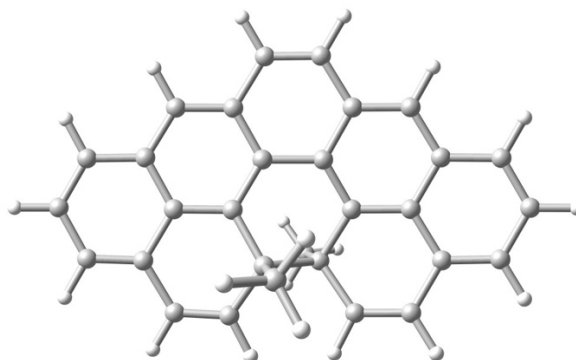



|   |              |              |              |
|---|--------------|--------------|--------------|
| H | 0.008036000  | 5.523358000  | -2.235966000 |
| H | -2.197162000 | -0.202484000 | -2.350378000 |
| H | -2.218113000 | -0.292117000 | -0.570894000 |
| H | -2.514255000 | 1.267082000  | -1.388403000 |
| H | 2.197162000  | 0.202484000  | -2.350378000 |
| H | 2.218113000  | 0.292117000  | -0.570894000 |
| H | 2.514255000  | -1.267082000 | -1.388403000 |

**o-DMNC (broken-symmetry unrestricted singlet)**

|   |              |              |              |
|---|--------------|--------------|--------------|
| C | 2.254364000  | -0.714184000 | 0.123880000  |
| C | 2.254250000  | 0.714378000  | -0.124058000 |
| C | 3.479466000  | -1.413049000 | -0.032641000 |
| C | 3.479248000  | 1.413428000  | 0.032453000  |
| C | 4.699715000  | 0.682648000  | 0.062689000  |
| C | 4.699815000  | -0.682075000 | -0.063021000 |
| C | 3.457420000  | -2.837592000 | -0.161090000 |
| C | 1.084906000  | -1.460425000 | 0.496484000  |
| C | 1.044881000  | -2.838230000 | 0.142517000  |
| C | 2.273233000  | -3.511500000 | -0.170927000 |
| C | -0.195116000 | -3.493889000 | 0.053022000  |
| C | -1.402493000 | -2.817003000 | 0.327785000  |
| C | -1.338392000 | -1.524469000 | 0.949883000  |
| C | -0.077164000 | -0.893418000 | 1.171893000  |
| C | -2.545002000 | -0.905844000 | 1.382246000  |
| C | -2.457570000 | 0.293752000  | 2.124156000  |
| C | -1.224771000 | 0.780843000  | 2.501794000  |
| C | -0.017648000 | 0.194915000  | 2.076501000  |
| C | 1.084626000  | 1.460488000  | -0.496369000 |
| C | 1.044397000  | 2.838222000  | -0.142164000 |
| C | 2.272668000  | 3.511647000  | 0.171259000  |
| C | 3.456973000  | 2.837946000  | 0.161139000  |
| C | -0.077353000 | 0.893429000  | -1.171859000 |
| C | -1.338674000 | 1.524269000  | -0.949828000 |
| C | -1.402982000 | 2.816646000  | -0.327425000 |
| C | -0.195708000 | 3.493658000  | -0.052492000 |
| C | -2.545154000 | 0.905605000  | -1.382492000 |
| C | -3.790925000 | 1.512927000  | -1.075852000 |
| C | -3.842023000 | 2.733461000  | -0.420816000 |
| C | -2.457481000 | -0.293774000 | -2.124736000 |
| C | -1.224571000 | -0.780637000 | -2.502323000 |
| C | -0.017576000 | -0.194702000 | -2.076667000 |
| C | -3.790667000 | -1.513390000 | 1.075617000  |
| C | -3.841554000 | -2.734098000 | 0.420892000  |
| C | -2.663462000 | -3.397025000 | 0.073427000  |
| C | 1.255618000  | 0.713617000  | 2.696099000  |
| C | 1.255938000  | -0.713170000 | -2.695971000 |
| H | 5.640319000  | 1.233695000  | 0.135801000  |
| H | 5.640502000  | -1.232979000 | -0.136144000 |
| H | 4.401656000  | -3.365413000 | -0.314807000 |
| H | 2.242414000  | -4.584254000 | -0.375829000 |
| H | -0.226789000 | -4.532614000 | -0.285926000 |
| H | -3.373868000 | 0.797675000  | 2.439080000  |
| H | -1.172099000 | 1.651755000  | 3.160421000  |
| H | 2.241689000  | 4.584362000  | 0.376346000  |
| H | 4.401135000  | 3.365900000  | 0.314854000  |
| H | -0.227538000 | 4.532324000  | 0.286621000  |
| H | -4.710328000 | 1.006950000  | -1.379469000 |
| H | -4.807681000 | 3.193233000  | -0.199153000 |
| H | -3.373678000 | -0.797736000 | -2.439888000 |
| H | -1.171706000 | -1.651406000 | -3.161123000 |
| H | -4.710164000 | -1.007438000 | 1.378991000  |
| H | -4.807135000 | -3.194030000 | 0.199228000  |
| H | 1.083086000  | 0.898425000  | 3.767041000  |
| H | 1.582136000  | 1.666225000  | 2.252437000  |
| H | 2.085464000  | 0.002441000  | 2.604112000  |
| H | 1.083813000  | -0.897631000 | -3.767035000 |
| H | 1.582388000  | -1.665901000 | -2.252527000 |
| H | 2.085702000  | -0.001961000 | -2.603416000 |
| H | -2.705826000 | -4.381628000 | -0.398424000 |
| C | -2.664047000 | 3.396441000  | -0.073043000 |
| H | -2.706591000 | 4.380936000  | 0.399018000  |

**Thermochemistry**  
 Temperature: 298.150 Kelvin; Pressure: 1.00000 Atm.  
 Zero-point correction = 0.498623 (Hartree/Particle)  
 Thermal correction to Energy = 0.524538  
 Thermal correction to Enthalpy = 0.525482  
 Thermal correction to Gibbs Free Energy = 0.447064  
 Sum of electronic and zero-point Energies = -1460.531055  
 Sum of electronic and thermal Energies = -1460.505140  
 Sum of electronic and thermal Enthalpies = -1460.504196  
 Sum of electronic and thermal Free Energies = -1460.582614  
 Charge = 0 Multiplicity = 1

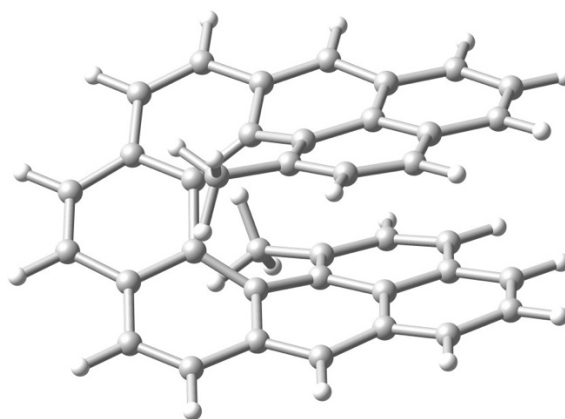

### c-DMNC

#### Thermochemistry

Temperature: 298.150 Kelvin; Pressure: 1.00000 Atm.

Zero-point correction = 0.503732 (Hartree/Particle)

Thermal correction to Energy = 0.528851

Thermal correction to Enthalpy = 0.529795

Thermal correction to Gibbs Free Energy = 0.452585

Sum of electronic and zero-point Energies = -1460.522945

Sum of electronic and thermal Energies = -1460.497825

Sum of electronic and thermal Enthalpies = -1460.496881

Sum of electronic and thermal Free Energies = -1460.574091

Charge = 0 Multiplicity = 1

|   |              |              |              |
|---|--------------|--------------|--------------|
| C | 2.380429000  | 0.276972000  | -0.069067000 |
| C | 1.960201000  | -1.059977000 | -0.219636000 |
| C | 3.719982000  | 0.576672000  | 0.254097000  |
| C | 2.928376000  | -2.060075000 | -0.326350000 |
| C | 4.283103000  | -1.747940000 | -0.073933000 |
| C | 4.666017000  | -0.467703000 | 0.263570000  |
| C | 4.062871000  | 1.929784000  | 0.624297000  |
| C | 1.419109000  | 1.354777000  | -0.204124000 |
| C | 1.768710000  | 2.666214000  | 0.231513000  |
| C | 3.127564000  | 2.909774000  | 0.661649000  |
| C | 0.810975000  | 3.672606000  | 0.187830000  |
| C | -0.482350000 | 3.418621000  | -0.296639000 |
| C | -0.793143000 | 2.122113000  | -0.815305000 |
| C | 0.179597000  | 1.102327000  | -0.789937000 |
| C | -2.109252000 | 1.870993000  | -1.333311000 |
| C | -2.391685000 | 0.543858000  | -1.867455000 |
| C | -1.479461000 | -0.433885000 | -1.873489000 |
| C | -0.055035000 | -0.269892000 | -1.412725000 |
| C | 0.461405000  | -1.351688000 | -0.326971000 |
| C | 0.182346000  | -2.786792000 | -0.766963000 |
| C | 1.274677000  | -3.689282000 | -1.089995000 |
| C | 2.552153000  | -3.387404000 | -0.801930000 |
| C | -0.363798000 | -1.089585000 | 0.964520000  |
| C | -1.746405000 | -1.468738000 | 0.850459000  |
| C | -2.140874000 | -2.510396000 | -0.051838000 |
| C | -1.082971000 | -3.258509000 | -0.708514000 |
| C | -2.736959000 | -0.894989000 | 1.685660000  |
| C | -4.102447000 | -1.227550000 | 1.486343000  |
| C | -4.466458000 | -2.183907000 | 0.567231000  |
| C | -3.473614000 | -2.861133000 | -0.167754000 |
| C | -2.314701000 | -0.031751000 | 2.728491000  |
| C | -0.979136000 | 0.118892000  | 2.970014000  |
| C | 0.031936000  | -0.431966000 | 2.125289000  |
| C | -3.052324000 | 2.872113000  | -1.313780000 |
| C | -2.742510000 | 4.158372000  | -0.799465000 |
| C | -1.494315000 | 4.428264000  | -0.308840000 |
| C | 0.776005000  | -0.398941000 | -2.717947000 |
| C | 1.440176000  | -0.273723000 | 2.654917000  |
| H | 5.028002000  | -2.544770000 | -0.139787000 |
| H | 5.706976000  | -0.247761000 | 0.512138000  |
| H | 5.096119000  | 2.141177000  | 0.910542000  |
| H | 3.395626000  | 3.919083000  | 0.983257000  |
| H | 1.067645000  | 4.679577000  | 0.527542000  |
| H | -3.386821000 | 0.362332000  | -2.280705000 |
| H | -1.725023000 | -1.388688000 | -2.338757000 |
| H | 1.012229000  | -4.677334000 | -1.476662000 |
| H | 3.347211000  | -4.118960000 | -0.964646000 |
| H | -1.304130000 | -4.272920000 | -1.052944000 |
| H | -4.857929000 | -0.731891000 | 2.101032000  |
| H | -5.517335000 | -2.449265000 | 0.434545000  |
| H | -3.058508000 | 0.447351000  | 3.369164000  |
| H | -0.651672000 | 0.699352000  | 3.836694000  |
| H | -4.054438000 | 2.671893000  | -1.700848000 |
| H | -3.510741000 | 4.934744000  | -0.799500000 |
| H | 1.844035000  | -0.202587000 | -2.561447000 |
| H | 0.399610000  | 0.320872000  | -3.457713000 |
| H | 0.666821000  | -1.411691000 | -3.135693000 |
| H | 1.846342000  | 0.733154000  | 2.474839000  |
| H | 2.142763000  | -1.006354000 | 2.246967000  |
| H | 1.410374000  | -0.416785000 | 3.745488000  |
| H | -1.251845000 | 5.418344000  | 0.084445000  |
| H | -3.754486000 | -3.678024000 | -0.837431000 |

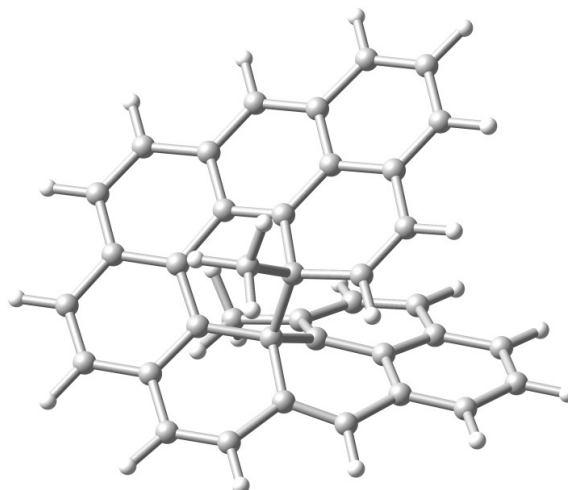

o-DMNC\* (broken-symmetry unrestricted singlet)

|   |              |              |              |
|---|--------------|--------------|--------------|
| C | -1.133781000 | 2.927224000  | 0.359165000  |
| C | -1.075398000 | 1.628360000  | 0.969278000  |
| C | 0.084063000  | 3.554839000  | 0.031482000  |
| C | 1.312788000  | 2.865525000  | 0.077647000  |
| C | 1.337486000  | 1.493586000  | 0.435390000  |
| C | 0.169479000  | 0.955097000  | 1.109575000  |
| C | 2.545581000  | 3.519498000  | -0.258445000 |
| C | 2.507501000  | 0.719418000  | 0.097585000  |
| C | 3.720420000  | 2.832780000  | -0.242441000 |
| C | 3.733255000  | 1.409695000  | -0.075343000 |
| C | 2.507540000  | -0.719291000 | -0.097576000 |
| C | 3.733330000  | -1.409504000 | 0.075351000  |
| C | 4.954968000  | -0.679053000 | 0.083347000  |
| C | 4.954932000  | 0.679310000  | -0.083332000 |
| C | 1.337567000  | -1.493519000 | -0.435390000 |
| C | 3.720572000  | -2.832591000 | 0.242437000  |
| C | 2.545771000  | -3.519374000 | 0.258425000  |
| C | 1.312943000  | -2.865464000 | -0.077667000 |
| C | 0.169532000  | -0.955085000 | -1.109571000 |
| C | 0.084257000  | -3.554849000 | -0.031519000 |
| C | -1.133621000 | -2.927294000 | -0.359191000 |
| C | -1.075309000 | -1.628416000 | -0.969280000 |
| C | -2.269057000 | 1.010965000  | 1.445840000  |
| C | -2.184279000 | -0.210944000 | 2.150022000  |
| C | -0.948449000 | -0.777454000 | 2.415809000  |
| C | 0.216161000  | -0.202886000 | 1.907366000  |
| C | 0.216150000  | 0.202909000  | -1.907348000 |
| C | -0.948494000 | 0.777433000  | -2.415765000 |
| C | -2.184294000 | 0.210860000  | -2.149968000 |
| C | -2.269004000 | -1.011067000 | -1.445811000 |
| C | -3.509605000 | 1.653863000  | 1.197928000  |
| C | -3.558059000 | 2.881544000  | 0.557376000  |
| C | -2.398061000 | 3.551581000  | 0.150067000  |
| C | -3.509517000 | -1.654034000 | -1.197903000 |
| C | -2.397868000 | -3.551720000 | -0.150096000 |
| C | -3.557904000 | -2.881732000 | -0.557379000 |
| H | 0.090737000  | 4.592833000  | -0.306109000 |
| H | 2.527132000  | 4.589466000  | -0.479141000 |
| H | 4.669318000  | 3.346804000  | -0.413358000 |
| H | 5.895081000  | -1.228501000 | 0.172878000  |
| H | 5.895016000  | 1.228808000  | -0.172861000 |
| H | 4.669497000  | -3.346564000 | 0.413354000  |
| H | 2.527379000  | -4.589345000 | 0.479109000  |
| H | 0.090988000  | -4.592847000 | 0.306056000  |
| H | -3.102144000 | -0.685789000 | 2.503727000  |
| H | -0.880706000 | -1.692288000 | 3.007835000  |
| H | 1.177719000  | -0.668969000 | 2.119978000  |
| H | 1.177683000  | 0.669042000  | -2.119964000 |
| H | -0.880802000 | 1.692279000  | -3.007777000 |
| H | -3.102186000 | 0.685666000  | -2.503656000 |
| H | -4.431205000 | 1.168911000  | 1.527980000  |
| H | -4.528140000 | 3.353835000  | 0.380814000  |
| H | -4.431145000 | -1.169120000 | -1.527934000 |
| H | -4.527959000 | -3.354075000 | -0.380817000 |
| C | -2.487767000 | 4.903610000  | -0.500141000 |
| H | -3.534007000 | 5.214547000  | -0.623576000 |
| H | -1.979253000 | 5.675928000  | 0.100129000  |
| H | -2.014271000 | 4.905467000  | -1.495201000 |
| C | -2.487502000 | -4.903766000 | 0.500086000  |
| H | -3.533726000 | -5.214748000 | 0.623542000  |
| H | -1.978974000 | -5.676051000 | -0.100213000 |
| H | -2.013981000 | -4.905626000 | 1.495134000  |

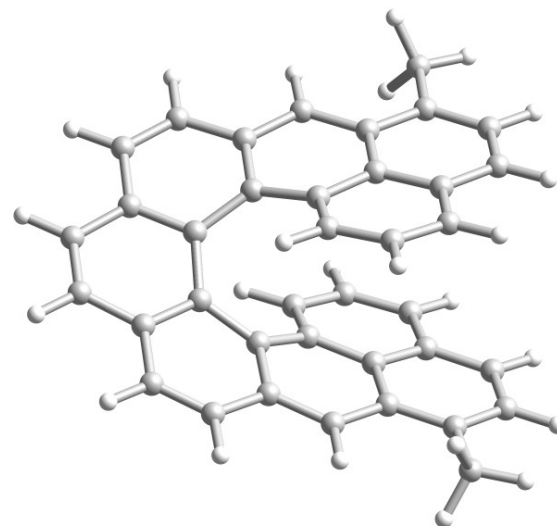

**Thermochemistry**

Temperature: 298.150 Kelvin; Pressure: 1.00000 Atm.

Zero-point correction = 0.498515 (Hartree/Particle)

Thermal correction to Energy = 0.524889

Thermal correction to Enthalpy = 0.525833

Thermal correction to Gibbs Free Energy = 0.445052

Sum of electronic and zero-point Energies = -1460.537611

Sum of electronic and thermal Energies = -1460.511238

Sum of electronic and thermal Enthalpies = -1460.510293

Sum of electronic and thermal Free Energies = -1460.591074

Charge = 0 Multiplicity = 1

### c-DMNC\*

|   |              |              |              |
|---|--------------|--------------|--------------|
| C | 1.537922000  | 2.079089000  | -0.039762000 |
| C | 0.182365000  | 2.420778000  | -0.224575000 |
| C | 2.487312000  | 3.067434000  | 0.302992000  |
| C | -0.159875000 | 3.769368000  | -0.355616000 |
| C | 0.809436000  | 4.760685000  | -0.088144000 |
| C | 2.091338000  | 4.419261000  | 0.290036000  |
| C | 3.820051000  | 2.651979000  | 0.676986000  |
| C | 1.966493000  | 0.701574000  | -0.191456000 |
| C | 3.267694000  | 0.315348000  | 0.233089000  |
| C | 4.176986000  | 1.344464000  | 0.686108000  |
| C | 3.636051000  | -1.024244000 | 0.155468000  |
| C | 2.759486000  | -1.996440000 | -0.356941000 |
| C | 1.488162000  | -1.576355000 | -0.866050000 |
| C | 1.115103000  | -0.220059000 | -0.798504000 |
| C | 0.589345000  | -2.546303000 | -1.428198000 |
| C | -0.689312000 | -2.084153000 | -1.959269000 |
| C | -1.056017000 | -0.797819000 | -1.932892000 |
| C | -0.188761000 | 0.290471000  | -1.380023000 |
| C | -0.849963000 | 1.297694000  | -0.339272000 |
| C | -2.208738000 | 1.800982000  | -0.810320000 |
| C | -2.386810000 | 3.192725000  | -1.187723000 |
| C | -1.469760000 | 4.130188000  | -0.887907000 |
| C | -1.068750000 | 0.508514000  | 0.964202000  |
| C | -2.177616000 | -0.391991000 | 0.986907000  |
| C | -3.251674000 | -0.252403000 | 0.048214000  |
| C | -3.284789000 | 0.986098000  | -0.715426000 |
| C | -2.246740000 | -1.403803000 | 1.979534000  |
| C | -3.303429000 | -2.349099000 | 1.911819000  |
| C | -4.272548000 | -2.251386000 | 0.943569000  |
| C | -4.285587000 | -1.181535000 | 0.015067000  |
| C | -1.271000000 | -1.430629000 | 3.010698000  |
| C | -0.292445000 | -0.471361000 | 3.052990000  |
| C | -0.186301000 | 0.492676000  | 2.022918000  |
| C | 0.960914000  | -3.867677000 | -1.452374000 |
| C | 2.216672000  | -4.283159000 | -0.941045000 |
| C | 3.114224000  | -3.393453000 | -0.405933000 |
| H | 0.073348000  | 0.941493000  | -2.239391000 |
| H | 0.525781000  | 5.812217000  | -0.177823000 |
| H | 2.817424000  | 5.194169000  | 0.547255000  |
| H | 4.534739000  | 3.421554000  | 0.979061000  |
| H | 5.179841000  | 1.047216000  | 1.002472000  |
| H | 4.633561000  | -1.312149000 | 0.492166000  |
| H | -1.351562000 | -2.831835000 | -2.403210000 |
| H | -2.003996000 | -0.495639000 | -2.379192000 |
| H | -3.351249000 | 3.479238000  | -1.614997000 |
| H | -1.670900000 | 5.186183000  | -1.083687000 |
| H | -4.250352000 | 1.341619000  | -1.085088000 |
| H | -3.338597000 | -3.156283000 | 2.647613000  |
| H | -5.074547000 | -2.993072000 | 0.904688000  |
| H | -1.326857000 | -2.208800000 | 3.775695000  |
| H | 0.438093000  | -0.463022000 | 3.864376000  |
| H | 0.632945000  | 1.208867000  | 2.067165000  |
| H | 0.279417000  | -4.611969000 | -1.871703000 |
| H | 2.474596000  | -5.344817000 | -0.978145000 |
| C | -5.419737000 | -1.053943000 | -0.968172000 |
| H | -6.062665000 | -1.944536000 | -0.948963000 |
| H | -6.056351000 | -0.183625000 | -0.738043000 |
| H | -5.052205000 | -0.923693000 | -1.997390000 |
| C | 4.443232000  | -3.857535000 | 0.123213000  |
| H | 5.280172000  | -3.389371000 | -0.419682000 |
| H | 4.564912000  | -3.603231000 | 1.188305000  |
| H | 4.546844000  | -4.946403000 | 0.023265000  |

### Thermochemistry

Temperature: 298.150 Kelvin; Pressure: 1.00000 Atm.

Zero-point correction = 0.503555 (Hartree/Particle)

Thermal correction to Energy = 0.529157

Thermal correction to Enthalpy = 0.530102

Thermal correction to Gibbs Free Energy = 0.450830

Sum of electronic and zero-point Energies = -1460.537626

Sum of electronic and thermal Energies = -1460.512024

Sum of electronic and thermal Enthalpies = -1460.511079

Sum of electronic and thermal Free Energies = -1460.590351

Charge = 0 Multiplicity = 1

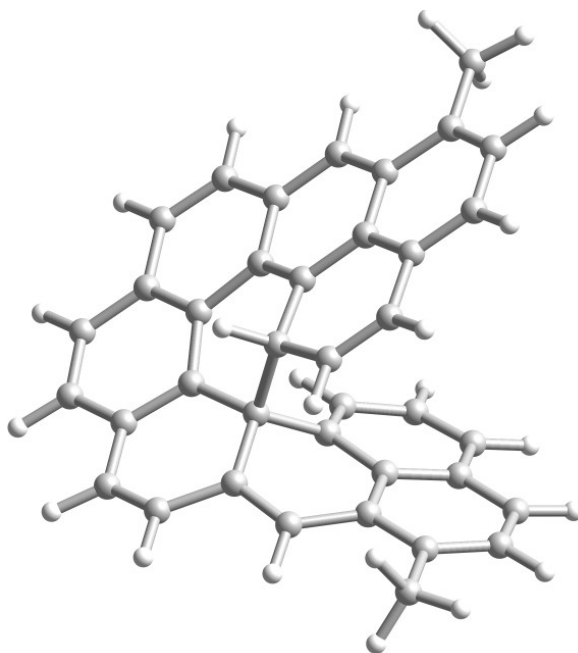

## References

- 1 G. R. Fulmer, A. J. M. Miller, N. H. Sherden, H. E. Gottlieb, A. Nudelman, B. M. Stoltz, J. E. Bercaw, K. I. Goldberg, *Organometallics*, 2010, **29**, 2176–2179.
- 2 B. G. Das, A. Chirila, M. Tromp, J. N. H. Reek, B. de Bruin, *J. Am. Chem. Soc.*, **2016**, *138*, 8968–8975.
- 3 X. Liu, Z. Wang, Q. Chen, M. He, L. Wang, *Appl. Organomet. Chem.*, 2018, **32**, e4039.
- 4 R. C. Clark, J. S. Reid, *Acta Crystallogr. Sect. A*, 1995, **51**, 887–897.
- 5 CrysAlisPro. Rigaku Oxford Diffraction Ltd: Yarnton, England 2019.
- 6 O. v Dolomanov, L. J. Bourhis, R. J. Gildea, J. A. K. Howard, H. Puschmann *J. Appl. Crystallogr.*, 2009, **42**, 339–341.
- 7 G. M. Sheldrick, SHELXT – Integrated Space-Group and Crystal-Structure Determination. *Acta Crystallogr. Sect. A*, 2015, **71**, 3–8.
- 8 G. M. Sheldrick, *Acta Crystallogr. Sect. C*, 2015, **71**, 3–8.
- 9 A. L. Spek, *Acta Crystallogr. Sect. D*, 2009, **65**, 148–155.
- 10 M. J. Frisch, G. W. Trucks, H. B. Schlegel, G. E. Scuseria, M. A. Robb, J. R. Cheeseman, G. Scalmani, V. Barone, G. A. Petersson, H. Nakatsuji, X. Li, M. Caricato, A. v. Marenich, J. Bloino, B. G. Janesko, R. Gomperts, B. Mennucci, H. P. Hratchian, J. v. Ortiz, A. F. Izmaylov, J. L. Sonnenberg, D. Williams-Young, F. Ding, F. Lipparini, F. Egidi, J. Goings, B. Peng, A. Petrone, T. Henderson, D. Ranasinghe, V. G. Zakrzewski, J. Gao, N. Rega, G. Zheng, W. Liang, M. Hada, M. Ehara, K. Toyota, R. Fukuda, J. Hasegawa, M. Ishida, T. Nakajima, Y. Honda, O. Kitao, H. Nakai, T. Vreven, K. Throssell, J. A. Jr. Montgomery, J. E. Peralta, F. Ogliaro, M. J. Bearpark, J. J. Heyd, E. N. Brothers, K. N. Kudin, V. N. Staroverov, T. A. Keith, R. Kobayashi, J. Normand, K. Raghavachari, A. P. Rendell, J. C. Burant, S. S. Iyengar, J. Tomasi, M. Cossi, J. M. Millam, M. Klene, C. Adamo, R. Cammi, J. W. Ochterski, R. L. Martin, K. Morokuma, O. Farkas, J. B. Foresman, D. J. Fox, Gaussian 16 Rev. C.01. Wallingford, CT 2016.
- 11 F. Neese, F. Wennmohs, U. Becker, C. Riplinger, *J. Chem. Phys.*, 2020, **152**, 224108.
- 12 WinSim EPR simulator, <https://www.niehs.nih.gov/research/resources/software/tox-pharm/tools/index.cfm>, retrieved 02.02.2023.
- 13 K. Yamaguchi, *Chem. Phys. Lett.*, 1975, **33**, 330–335.
- 14 P. v. R. Schleyer, C. Maerker, A. Dransfeld, H. Jiao, N. J. R. van Eikema Hommes, *J. Am. Chem. Soc.*, 1996, **118**, 6317–6318.
- 15 D. Geuenich, K. Hess, F. Köhler, R. Herges, *Chem. Rev.*, 2005, **105**, 3758–3772.
- 16 R. Herges, D. Geuenich, *J. Phys. Chem. A*, 2001, **105**, 3214–3220.
- 17 D. Čavlović, D. Häussinger, O. Blacque, P. Ravat, M. Juriček, *JACS Au*, 2022, **2**, 1616–1626.
